# Supplementary material for: Association of Overweight with Food Portion Size among Adults of São Paulo – Brazil
Source: PubMed Central journal article supplement (PMC5051931; doi:10.1371/journal.pone.0164127), 2016-10-05

**S1 Fig. Percentage of energy contribution (%) and dietary energy density (ED in kJ/g and kcal/g) of food groups consumed by adults in the Health Survey of São Paulo (2008).**

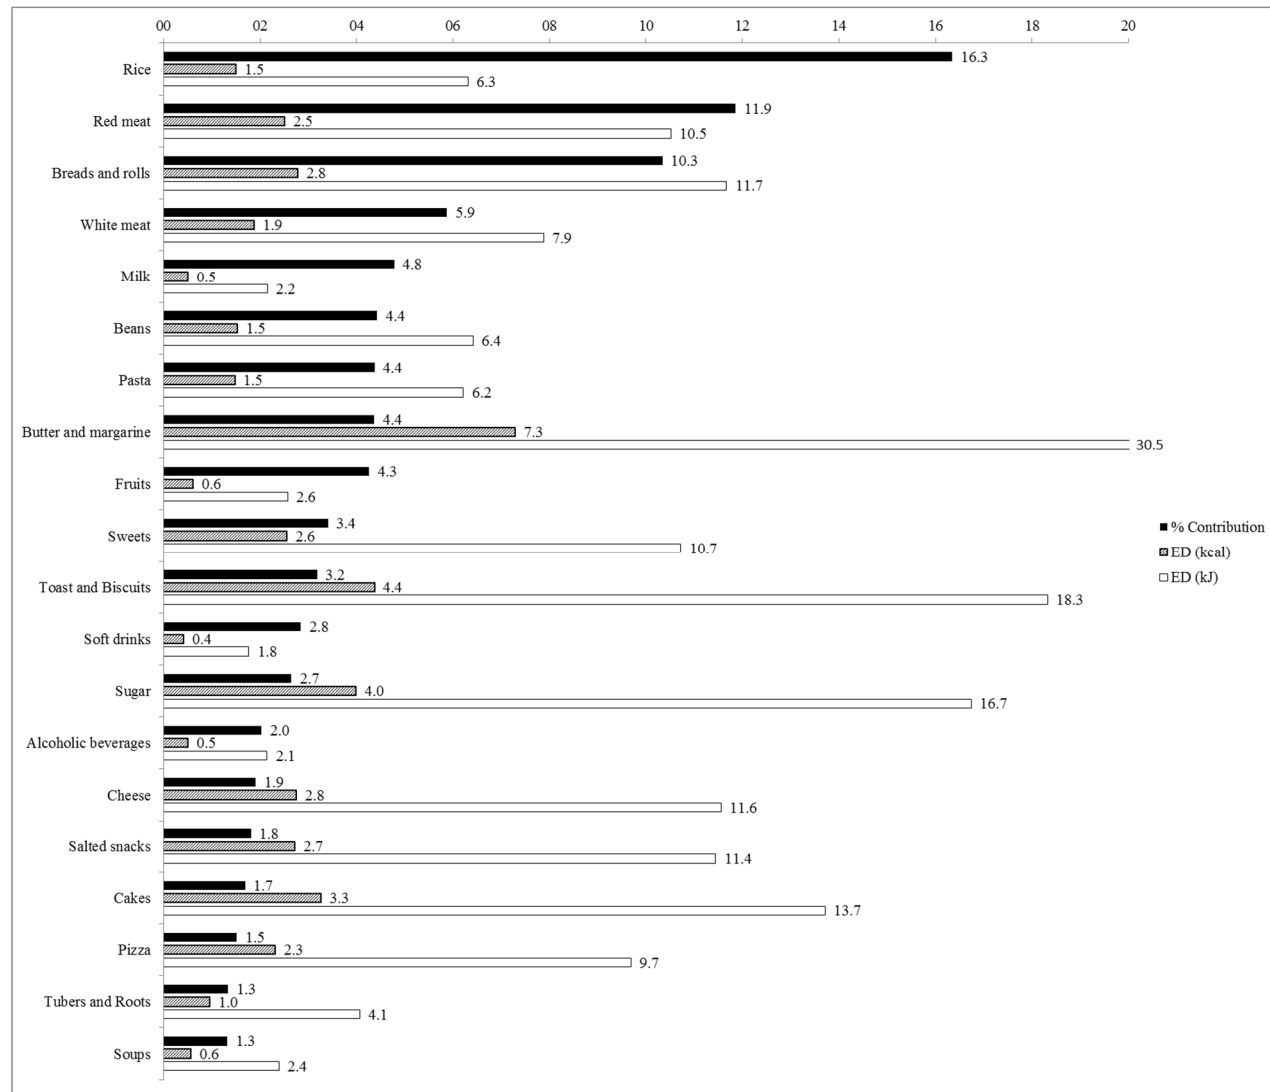

Supplement: pone.0164127.s001.pdf [file pone.0164127.s001.pdf]
