# Supplementary material for: Association of Overweight with Food Portion Size among Adults of São Paulo – Brazil
Source: PubMed Central journal article supplement (PMC5051931; doi:10.1371/journal.pone.0164127), 2016-10-05
Supplement: pone.0164127.s002.pdf [file pone.0164127.s002.pdf]

| id | age | gender    | familyincome_percapita | education_household | physical_activity | BMI      | energy_kcal_mean | energy_kcal_msm | grams_total_mean | grams_total_msm |
|----|-----|-----------|------------------------|---------------------|-------------------|----------|------------------|-----------------|------------------|-----------------|
| 1  | 54  | Feminino  | 425.5                  | 8                   | insuf. ativo      | 25.97012 | 1110.57          | 1299.235        | 1049.52          | 1169.696        |
| 2  | 57  | Masculino | 425.5                  | 8                   | sedentário        | 19.9446  | 2820.76          | 2637.858        | 1695.57          | 1663.744        |
| 3  | 34  | Feminino  | 425.5                  | 8                   | sedentário        | 30.48316 | 2747.15          | 2584.86         | 1854.17          | 1777.204        |
| 4  | 28  | Feminino  | 425.5                  | 8                   | sedentário        | 21.0772  | 1967.35          | 2001.95         | 809.47           | 968.2084        |
| 5  | 25  | Feminino  | 425.5                  | 8                   | ativo             | 24.67702 | 1230.63          | 1403.085        | 1617.44          | 1606.881        |
| 6  | 90  | Feminino  | 807.5                  | 13                  | sedentário        | 31.25    | 1401.42          | 1547.355        | 1753.36          | 1705.382        |
| 7  | 41  | Feminino  | 400                    | 8                   | ativo             | 24.56747 | 1227.15          | 1400.105        | 648.89           | 825.4564        |
| 8  | 62  | Feminino  | 407.1429               | 4                   | insuf. ativo      | 28.57796 | 843.01           | 1042.708        | 762.155          | 918.9025        |
| 9  | 59  | Feminino  | 433.3333               | 1                   | ativo             | 20.3125  | 2050.115         | 2042.293        | 1457.675         | 1488.405        |
| 10 | 73  | Feminino  | 138.3333               |                     | ativo             | 33.62209 | 1319.28          | 1378.581        | 1143.775         | 1064.341        |
| 11 | 84  | Masculino |                        | 3                   | insuf. ativo      | 24.69136 | 2321.61          | 2272.01         | 1464.15          | 1493.272        |
| 12 | 75  | Masculino | 382.5                  | 12                  | ativo             | 25.71166 | 2011.78          | 2012.328        | 1810.355         | 1711.79         |
| 13 | 78  | Feminino  | 1010                   | 4                   | insuf. ativo      | 25.23634 | 1698.515         | 1766.52         | 1502.915         | 1516.576        |
| 14 | 23  | Masculino | 275                    | 7                   | ativo             | 21.09375 | 1502.24          | 1630.807        | 1348.68          | 1405.735        |
| 15 | 30  | Feminino  | 275                    | 7                   | sedentário        | 29.0927  | 1566.83          | 1683.656        | 1458.35          | 1488.917        |
| 16 | 21  | Feminino  | 275                    | 7                   | sedentário        | 20.76124 | 824.45           | 1042.05         | 800.76           | 960.6483        |
| 17 | 63  | Feminino  | 138.3333               | 0                   | sedentário        | 28.125   | 2204.9           | 2181.986        | 1950.65          | 1788.086        |
| 18 | 75  | Masculino | 1192                   | 4                   | ativo             | 23.25502 | 1444.855         | 1559.083        | 1161.35          | 1256.821        |
| 19 | 71  | Feminino  | 1192                   | 4                   | ativo             | 24.63547 | 1411.09          | 1545.934        | 1022.42          | 1127.948        |
| 20 | 60  | Masculino | 494.3333               | 8                   | muito ativo       | 28.32658 | 1206             | 1374.894        | 1790.145         | 1729.483        |
| 21 | 50  | Feminino  | 925                    | 13                  | sedentário        | 26.31464 | 1175.45          | 1342.043        | 1089.895         | 1200.245        |
| 22 | 25  | Masculino | 925                    | 13                  | muito ativo       | 24.16716 | 620.28           | 848.0743        | 664.26           | 839.4511        |
| 23 | 28  | Feminino  | 925                    | 13                  | sedentário        | 21.49029 | 1607.87          | 1716.999        | 1161.16          | 1259.495        |
| 24 | 71  | Feminino  | 941.3333               | 3                   | insuf. ativo      | 26.95313 | 2355.48          | 2297.343        | 1383.03          | 1431.963        |
| 25 | 51  | Masculino | 240                    | 11                  | muito ativo       | 22.20408 | 3266.265         | 2941.927        | 2242.705         | 2032.581        |
| 26 | 43  | Feminino  | 240                    | 11                  | ativo             | 30.79585 | 1685.095         | 1734.638        | 1554.39          | 1535.098        |
| 27 | 66  | Masculino | 1250                   | 4                   | sedentário        | 29.29688 | 1884.995         | 1841.222        | 1364.75          | 1390.987        |
| 28 | 71  | Feminino  | 1250                   | 4                   | sedentário        | 29.55255 | 1981.495         | 1993.226        | 1544.065         | 1552.464        |
| 29 | 87  | Masculino |                        | 11                  | sedentário        | 21.60494 | 1965.665         | 1985.9          | 1644.06          | 1622.796        |
| 30 | 62  | Masculino | 300                    | 0.5                 | ativo             | 24.60938 | 1341.65          | 1494.811        | 1544.145         | 1508.496        |
| 31 | 60  | Feminino  | 300                    | 0.5                 | sedentário        | 26.22222 | 1061.15          | 1255.47         | 1203.365         | 1290.242        |
| 32 | 39  | Feminino  | 266.6667               | 11                  | insuf. ativo      | 27.53482 | 1524.425         | 1638.652        | 926.315          | 1065.034        |
| 33 | 40  | Masculino | 266.6667               | 11                  | ativo             | 24.97704 | 3280.42          | 2962.275        | 2400.66          | 2151.002        |
| 34 | 27  | Masculino |                        | 4                   | sedentário        | 22.20408 | 1475.72          | 1608.971        | 1135.42          | 1238.985        |
| 35 | 29  | Masculino |                        | 13                  | sedentário        | 23.42356 | 2162.28          | 2151.737        | 1258.64          | 1336.186        |
| 36 | 88  | Feminino  | 1902.5                 | 13                  | sedentário        | 28.13366 | 1502.605         | 1630.878        | 1308.41          | 1346.717        |
| 37 | 66  | Feminino  | 1902.5                 | 13                  | muito ativo       | 25.80645 | 1157.27          | 1339.886        | 877.16           | 1026.322        |
| 38 | 82  | Feminino  | 1000                   | 4                   | insuf. ativo      | 21.64412 | 591.62           | 819.9824        | 596.54           | 777.2004        |
| 39 | 84  | Masculino | 1000                   | 4                   | sedentário        | 24.22145 | 585.96           | 814.4065        | 484.76           | 670.7448        |
| 40 | 85  | Masculino | 2288                   | 13                  | ativo             | 26.98962 | 1621.07          | 1727.685        | 1715.93          | 1678.453        |

|    |    |           |          |     |              |          |          |          |          |          |
|----|----|-----------|----------|-----|--------------|----------|----------|----------|----------|----------|
| 41 | 75 | Feminino  | 2288     | 13  | ativo        | 27.35884 | 1892.95  | 1943.952 | 2318.48  | 2096.292 |
| 42 | 63 | Masculino | 6050     | 12  | sedentário   | 29.41076 | 2075.46  | 2077.24  | 2682.88  | 2334.702 |
| 43 | 61 | Feminino  | 1750     | 13  | ativo        | 27.94215 | 1189.5   | 1353.791 | 1089.43  | 1185.861 |
| 44 | 63 | Masculino | 6666.667 | 13  | muito ativo  | 30.09496 | 1882.74  | 1932.344 | 2920.32  | 2375.67  |
| 45 | 76 | Masculino | 2350     | 12  | ativo        | 20.57613 | 1935.325 | 1976.951 | 1655.575 | 1573.263 |
| 46 | 80 | Masculino | 375      | 3   | sedentário   | 29.01745 | 2544.22  | 2437.1   | 1531.5   | 1543.535 |
| 47 | 67 | Feminino  | 375      | 3   | sedentário   | 28.51563 | 2180.19  | 2165.35  | 1609.36  | 1600.961 |
| 48 | 82 | Feminino  | 207.5    |     | ativo        | 22.04916 | 1858.65  | 1917.051 | 1357.72  | 1412.653 |
| 49 | 42 | Feminino  | 112.5    |     | ativo        | 28       | 1825.47  | 1890.927 | 1545.12  | 1553.632 |
| 50 | 73 | Feminino  | 415      | 3   | sedentário   | 31.0137  | 856.705  | 1056.665 | 659.78   | 815.3809 |
| 51 | 75 | Feminino  | 830      | 0   | insuf. ativo | 25       | 755.405  | 964.2466 | 962.585  | 1086.211 |
| 52 | 25 | Masculino | 240      |     | ativo        | 20.98399 | 2881.13  | 2681.097 | 1451.58  | 1483.828 |
| 53 | 68 | Masculino | 425      | 7   | sedentário   | 25.86451 | 2067.8   | 2079.517 | 1593.24  | 1589.13  |
| 54 | 62 | Feminino  | 425      | 7   | ativo        | 32.00732 | 1237.56  | 1409.016 | 1026.55  | 1150.938 |
| 55 | 40 | Feminino  |          | 8   | insuf. ativo | 20.95661 | 1337.43  | 1493.748 | 1182.06  | 1276.066 |
| 56 | 66 | Feminino  | 535      | 1   | sedentário   | 31.25    | 1352.56  | 1501.358 | 1379.185 | 1405.486 |
| 57 | 42 | Masculino | 535      | 1   | ativo        | 29.51557 | 2330.04  | 2276.552 | 2062.195 | 1919.665 |
| 58 | 51 | Masculino | 512.3333 | 0   | ativo        | 29.75207 | 871.19   | 1084.695 | 949.365  | 1080.262 |
| 59 | 51 | Feminino  | 512.3333 | 0   | ativo        | 26.95313 | 1280.99  | 1446.028 | 1108.68  | 1217.557 |
| 60 | 26 | Feminino  | 120      | 8   | insuf. ativo | 24.98959 | 2384.675 | 2318.189 | 1958.825 | 1850.007 |
| 61 | 50 | Masculino | 1638.333 | 0.5 | muito ativo  | 24.56747 | 3442.93  | 3074.502 | 3535.49  | 2864.977 |
| 62 | 76 | Feminino  | 830      | 4   | sedentário   | 26.34649 | 870.6851 | 1057.742 | 1043.63  | 1138.654 |
| 63 | 26 | Masculino | 457.5    | 12  | muito ativo  | 23.04002 | 3070.04  | 2802.522 | 2732.83  | 2318.969 |
| 64 | 52 | Feminino  | 457.5    | 12  | insuf. ativo | 26.07897 | 1005.265 | 1191.341 | 724.66   | 883.242  |
| 65 | 33 | Masculino | 720      | 10  | insuf. ativo | 26.23457 | 2330.63  | 2278.764 | 2336.47  | 2108.31  |
| 66 | 25 | Masculino | 720      | 10  | ativo        | 24.9308  | 3117.21  | 2848.315 | 2085.37  | 1938.339 |
| 67 | 67 | Masculino | 507.5    | 6   | sedentário   | 32.76939 | 1159.4   | 1285.731 | 967.325  | 1041.258 |
| 68 | 67 | Feminino  | 507.5    | 6   | ativo        | 27.70145 | 762.415  | 967.678  | 499.245  | 684.7401 |
| 69 | 45 | Feminino  | 180.5556 | 2   | insuf. ativo | 22.49135 | 1452.705 | 1279.582 | 1666.77  | 1526.732 |
| 70 | 47 | Masculino | 180.5556 | 2   | muito ativo  | 19.15709 | 2462.905 | 2204.562 | 2162.825 | 1765.824 |
| 71 | 22 | Feminino  | 180.5556 | 2   | ativo        | 24.8833  | 1988.435 | 1804.441 | 1624.975 | 1484.937 |
| 72 | 62 | Feminino  |          | 1   | insuf. ativo | 20.44674 | 2357.14  | 2298.583 | 1429.24  | 1466.993 |
| 73 | 62 | Feminino  | 415      | 3   | insuf. ativo | 23.72529 | 1332.22  | 1489.361 | 931.21   | 1071.958 |
| 74 | 48 | Feminino  | 682.5    | 11  | insuf. ativo | 20.39542 | 1580.77  | 1695.001 | 1011.18  | 1138.329 |
| 75 | 39 | Feminino  | 504.25   | 3   | ativo        | 31.2213  | 953.9    | 1160.263 | 919.9    | 1062.462 |
| 76 | 48 | Masculino | 666.6667 | 8   | ativo        | 25.08286 | 2114.05  | 2109.098 | 1945.8   | 1817.222 |
| 77 | 46 | Feminino  | 666.6667 | 8   | sedentário   | 28.13366 | 1207.32  | 1375.674 | 1235.93  | 1310.65  |
| 78 | 86 | Feminino  | 682.5    | 0   | sedentário   | 34.92768 | 1090.91  | 1282.02  | 621      | 799.8641 |
| 79 | 46 | Masculino | 525      | 11  | ativo        | 29.06122 | 1685.05  | 1715.925 | 1333.44  | 1378.281 |
| 80 | 45 | Feminino  | 525      | 11  | ativo        | 36.57979 | 2071.69  | 2080.447 | 1891.96  | 1800.15  |
| 81 | 82 | Feminino  | 400      | 4   | sedentário   | 29.51594 | 982.82   | 1186.235 | 1037.75  | 1160.097 |

|     |    |           |          |     |              |          |          |          |          |          |
|-----|----|-----------|----------|-----|--------------|----------|----------|----------|----------|----------|
| 82  | 54 | Feminino  | 300      | 8   | muito ativo  | 25.91068 | 1398.235 | 1503.773 | 1413.705 | 1423.057 |
| 83  | 32 | Masculino | 300      | 8   | ativo        | 26.84636 | 2548.3   | 2440.096 | 2549.57  | 2248.943 |
| 84  | 60 | Feminino  | 366.6667 | 0.5 | muito ativo  | 29.51594 | 658.19   | 884.8807 | 1147.28  | 1248.449 |
| 85  | 44 | Masculino | 188.3333 | 6   | sedentário   | 29.71428 | 1438.79  | 1575.851 | 1272.535 | 1343.273 |
| 86  | 69 | Feminino  | 475      | 4   | insuf. ativo | 30.46875 | 1612.53  | 1719.941 | 2056.065 | 1777.608 |
| 87  | 31 | Masculino | 1400     | 7   | muito ativo  | 38.30317 | 1927.37  | 1970.843 | 1364.62  | 1417.926 |
| 88  | 67 | Masculino | 525      | 4   | insuf. ativo | 36.43665 | 1335.79  | 1429.123 | 1461.61  | 1476.917 |
| 89  | 67 | Masculino | 313.3333 | 4   | sedentário   | 25.39063 | 1391.37  | 1532.18  | 1404.585 | 1411.52  |
| 90  | 64 | Feminino  | 313.3333 | 4   | insuf. ativo | 27.34375 | 1184.46  | 1348.88  | 1120.605 | 1186.88  |
| 91  | 30 | Feminino  | 1250     | 13  | ativo        | 22.60027 | 1314.33  | 1474.268 | 1221.88  | 1307.443 |
| 92  | 49 | Feminino  | 366.6667 | 8   | ativo        | 25.07619 | 1316.81  | 1476.362 | 1287.29  | 1358.445 |
| 93  | 68 | Feminino  | 415      | 2   | insuf. ativo | 18.73049 | 1915.835 | 1961.429 | 1785.765 | 1727.576 |
| 94  | 76 | Masculino | 966.4    | 3   | sedentário   | 23.69146 | 1139.365 | 1306.367 | 940.3099 | 1073.223 |
| 95  | 24 | Masculino | 60       | 8   | insuf. ativo | 27.70083 | 1851.39  | 1911.343 | 1640.79  | 1623.945 |
| 96  | 42 | Masculino | 440      | 10  | ativo        | 19.25703 | 2046.035 | 2035.872 | 1610.29  | 1601.319 |
| 97  | 50 | Feminino  | 675      | 11  | ativo        | 21.09375 | 1579.85  | 1694.253 | 1473.96  | 1500.628 |
| 98  | 73 | Masculino | 700      | 5   | ativo        | 26.18775 | 1590.915 | 1702.238 | 1326.395 | 1374.294 |
| 99  | 76 | Masculino | 537.5    | 4   | ativo        | 24.21875 | 2610.035 | 2430.223 | 1905.2   | 1790.866 |
| 100 | 72 | Feminino  | 537.5    | 4   | ativo        | 30.11242 | 1939.99  | 1980.605 | 1676.495 | 1648.427 |
| 101 | 83 | Feminino  | 830      | 4   | sedentário   | 25.29938 | 853.53   | 1068.898 | 714.03   | 884.2625 |
| 102 | 59 | Feminino  | 450      | 8   | muito ativo  | 23.63403 | 738.76   | 947.118  | 936.26   | 1074.126 |
| 103 | 52 | Masculino | 450      | 8   | ativo        | 27.14304 | 3745.375 | 3273.312 | 2532.385 | 2228.605 |
| 104 | 50 | Masculino | 788.75   | 8   | muito ativo  | 26.85441 | 2395.99  | 2240.965 | 1600.335 | 1536.024 |
| 105 | 22 | Masculino | 788.75   | 8   | ativo        | 25.43269 | 2015.515 | 1964.21  | 1521.535 | 1535.592 |
| 106 | 43 | Feminino  | 788.75   | 8   | insuf. ativo | 24.4646  | 1934.48  | 1940.136 | 1623.73  | 1593.291 |
| 107 | 81 | Feminino  | 800      | 0   | sedentário   | 27.34375 | 822.99   | 1040.697 | 609.09   | 788.8549 |
| 108 | 78 | Feminino  | 415      | 4   | ativo        | 18.94631 | 903.9901 | 1115.075 | 747.74   | 914.1981 |
| 109 | 68 | Feminino  | 207.5    | 0   | insuf. ativo | 22.26563 | 928.06   | 1096.555 | 1126.645 | 1231.869 |
| 110 | 48 | Masculino | 675      | 12  | ativo        | 21.41095 | 1005.425 | 1206.431 | 1530.51  | 1537.068 |
| 111 | 67 | Feminino  | 966.5    | 8   | insuf. ativo | 30.86301 | 1645.31  | 1739.052 | 1271.585 | 1337.564 |
| 112 | 62 | Feminino  | 207.5    | 5   | insuf. ativo | 45.78564 | 1133.095 | 1308.953 | 921.605  | 1060.127 |
| 113 | 49 | Masculino | 448      | 4   | muito ativo  | 29.41176 | 1712.64  | 1801.323 | 1205.92  | 1294.898 |
| 114 | 56 | Feminino  | 448      | 4   | insuf. ativo | 18.04803 | 1066.22  | 1260.313 | 1049.09  | 1169.346 |
| 115 | 79 | Feminino  | 601      | 4   | ativo        | 29.72108 | 805.305  | 1000.674 | 1340.625 | 1387.907 |
| 116 | 45 | Masculino | 1200     | 4   | muito ativo  | 22.32143 | 3585.775 | 3135.217 | 2753.47  | 2378.176 |
| 117 | 35 | Masculino | 740      | 11  | insuf. ativo | 28.90508 | 3757.42  | 3288.401 | 3336.8   | 2744.801 |
| 118 | 42 | Feminino  | 740      | 11  | ativo        | 24.21229 | 2413.92  | 2340.869 | 1958.76  | 1850.69  |
| 119 | 79 | Feminino  | 207.5    | 0.5 | ativo        | 28.51563 | 880.39   | 1093.542 | 791.37   | 952.4761 |
| 120 | 60 | Feminino  | 183.3333 | 4   | muito ativo  | 26.66667 | 882.8    | 1095.746 | 1071.22  | 1187.326 |
| 121 | 47 | Feminino  | 688.3333 | 12  | sedentário   | 34.22222 | 1137.92  | 1322.904 | 761.725  | 906.459  |
| 122 | 22 | Masculino | 688.3333 | 12  | sedentário   | 25.25951 | 2150.23  | 2135.909 | 2131.25  | 1968.691 |

|     |    |           |          |    |              |          |          |          |          |          |
|-----|----|-----------|----------|----|--------------|----------|----------|----------|----------|----------|
| 123 | 21 | Masculino | 688.3333 | 12 | sedentário   | 21.84465 | 3874.37  | 3338.8   | 3401.085 | 2760.35  |
| 124 | 20 | Masculino | 688.3333 | 12 | ativo        | 21.3103  | 2147.82  | 2071.524 | 1932.41  | 1795.714 |
| 125 | 24 | Feminino  | 688.3333 | 12 | muito ativo  | 24.34961 | 1972.385 | 1941.446 | 1325.955 | 1386.051 |
| 126 | 21 | Masculino | 168.75   | 11 | muito ativo  | 25.42001 | 2073.34  | 2064.862 | 1453.95  | 1450.445 |
| 127 | 64 | Feminino  | 207.5    | 4  | insuf. ativo | 24.21875 | 916.965  | 1125.354 | 955.86   | 1066.376 |
| 128 | 37 | Feminino  | 366.6667 | 11 | ativo        | 22.38631 | 2042.685 | 2010.634 | 1564.85  | 1464.356 |
| 129 | 41 | Masculino | 757.5    | 7  | ativo        | 23.37473 | 1592.955 | 1699.681 | 1467.91  | 1487.085 |
| 130 | 73 | Feminino  | 269.1667 | 11 | ativo        | 25.68371 | 1480.76  | 1613.127 | 1662.68  | 1639.888 |
| 131 | 52 | Masculino | 570.25   | 1  | muito ativo  | 24.91349 | 3090.5   | 2829.54  | 2311.7   | 2091.757 |
| 132 | 26 | Masculino | 570.25   | 1  | ativo        | 26.06168 | 3077.41  | 2820.326 | 1986     | 1869.665 |
| 133 | 59 | Masculino | 960      | 11 | sedentário   | 30.83653 | 2745.4   | 2583.596 | 2680.65  | 2333.958 |
| 134 | 28 | Masculino | 960      | 11 | insuf. ativo | 22.40879 | 2852.055 | 2642.086 | 2524.81  | 2138.025 |
| 135 | 21 | Masculino | 960      | 11 | muito ativo  | 24.4898  | 2575.93  | 2460.355 | 2113.63  | 1957.717 |
| 136 | 49 | Feminino  | 960      | 11 | ativo        | 29.06574 | 663.74   | 890.2366 | 688.38   | 861.2623 |
| 137 | 23 | Feminino  | 960      | 11 | muito ativo  | 22.40588 | 1848.77  | 1909.282 | 1388.94  | 1436.459 |
| 138 | 41 | Feminino  | 987.5    | 4  | muito ativo  | 23.24341 | 1399.76  | 1545.971 | 1671.39  | 1646.217 |
| 139 | 41 | Masculino | 987.5    | 4  | ativo        | 20.0692  | 1035.81  | 1233.439 | 441.38   | 627.9905 |
| 140 | 22 | Masculino | 987.5    | 4  | ativo        | 28.08163 | 2560.035 | 2446.635 | 1139.725 | 1214.07  |
| 141 | 21 | Feminino  | 987.5    | 4  | sedentário   | 20.76124 | 1972.84  | 2006.211 | 650.8    | 827.1996 |
| 142 | 54 | Feminino  | 645      | 0  | insuf. ativo | 33.16327 | 1225.87  | 1387.681 | 985.63   | 1114.994 |
| 143 | 64 | Feminino  | 100      | 5  | ativo        | 17.3076  | 1347.595 | 1499.673 | 1171.5   | 1260.378 |
| 144 | 67 | Feminino  | 600      | 4  | ativo        | 27.34375 | 1493.88  | 1623.932 | 1212.68  | 1300.216 |
| 145 | 26 | Feminino  | 214.4286 | 2  | ativo        | 20.54569 | 2945.055 | 2641.258 | 2070.775 | 1892.829 |
| 146 | 36 | Masculino | 125      | 11 | ativo        | 18.09161 | 2619.67  | 2467.835 | 2167.485 | 1978.271 |
| 147 | 27 | Feminino  | 125      | 11 | muito ativo  | 20.3125  | 1878.125 | 1928.397 | 1382.5   | 1421.685 |
| 148 | 56 | Feminino  | 375      | 8  | muito ativo  | 20.77562 | 1064.565 | 1258.404 | 1005.045 | 1133.193 |
| 149 | 48 | Masculino | 832      | 11 | ativo        | 26.3958  | 2637.04  | 2504.994 | 2124.95  | 1965.461 |
| 150 | 46 | Feminino  | 832      | 11 | muito ativo  | 24.00549 | 2208.73  | 2178.812 | 1770.47  | 1697.608 |
| 151 | 23 | Feminino  | 832      | 11 | muito ativo  | 22.18935 | 1549.57  | 1470.705 | 1251.625 | 1162.427 |
| 152 | 28 | Feminino  | 366.6667 | 11 | insuf. ativo | 25.29938 | 1951.94  | 1984.931 | 1652.27  | 1632.088 |
| 153 | 41 | Masculino | 1240     | 11 | muito ativo  | 29.40779 | 4797.59  | 3942.63  | 2994.05  | 2502.209 |
| 154 | 35 | Masculino | 500      | 11 | muito ativo  | 30.93044 | 2421.38  | 2346.408 | 1549.29  | 1556.719 |
| 155 | 78 | Feminino  | 375      | 4  | sedentário   | 32.05128 | 1039.395 | 1235.857 | 1109.56  | 1216.739 |
| 156 | 66 | Masculino | 600      | 4  | sedentário   | 23.4375  | 660.295  | 856.0042 | 668.465  | 839.4934 |
| 157 | 44 | Masculino | 523      | 8  | ativo        | 26.87868 | 908.7599 | 1119.414 | 1241.21  | 1322.584 |
| 158 | 68 | Masculino | 1415     | 4  | ativo        | 22.07031 | 2050.575 | 1948.708 | 1551.315 | 1390.002 |
| 159 | 72 | Feminino  | 1415     | 4  | insuf. ativo | 22.07108 | 847.175  | 1058.475 | 858.91   | 993.1702 |
| 160 | 41 | Masculino | 3000     | 11 | ativo        | 22.14533 | 3211.12  | 2892.292 | 2961.735 | 2459.862 |
| 161 | 77 | Feminino  | 606.6667 | 8  | insuf. ativo | 23.49524 | 1314.27  | 1469.486 | 1297.615 | 1351.104 |
| 162 | 56 | Masculino | 1300     | 12 | ativo        | 26.19619 | 2338.245 | 2278.938 | 2172.45  | 1997.376 |
| 163 | 29 | Masculino | 1300     | 12 | ativo        | 24.37673 | 1477.23  | 1610.216 | 1236.22  | 1318.681 |

|     |    |           |          |    |              |          |          |          |          |          |
|-----|----|-----------|----------|----|--------------|----------|----------|----------|----------|----------|
| 164 | 35 | Feminino  | 1300     | 12 | insuf. ativo | 19.31295 | 1565.54  | 1682.342 | 982.63   | 1114.751 |
| 165 | 28 | Feminino  | 780      | 7  | muito ativo  | 25.39063 | 2055.655 | 2067.014 | 1745.855 | 1698.552 |
| 166 | 61 | Masculino | 216.6667 | 4  | ativo        | 25.14861 | 1317.53  | 1476.97  | 1316.36  | 1380.906 |
| 167 | 70 | Feminino  | 298.3333 | 0  | sedentário   | 33.02508 | 1702.945 | 1771.496 | 1419.655 | 1459.737 |
| 168 | 61 | Feminino  | 403      | 11 | ativo        | 47.10569 | 1486.3   | 1551.677 | 821.225  | 910.1564 |
| 169 | 64 | Masculino | 1115     | 2  | sedentário   | 18.00554 | 1628.65  | 1733.813 | 1636.06  | 1620.494 |
| 170 | 30 | Feminino  | 590      | 11 | muito ativo  | 20.57613 | 1297.825 | 1455.339 | 782.48   | 935.9101 |
| 171 | 44 | Masculino | 433.3333 | 7  | ativo        | 32.74416 | 2684.82  | 2539.738 | 2129.83  | 1968.796 |
| 172 | 42 | Feminino  | 433.3333 | 7  | muito ativo  | 28.36035 | 1380.58  | 1529.953 | 934.28   | 1074.53  |
| 173 | 42 | Feminino  | 158.75   | 3  | insuf. ativo | 23.4375  | 1226.64  | 1347.459 | 962.72   | 1063.129 |
| 174 | 61 | Feminino  |          | 2  | sedentário   | 21.96712 | 1191.74  | 1369.68  | 873.05   | 1022.825 |
| 175 | 63 | Masculino | 175      | 4  | muito ativo  | 26.81359 | 1304.77  | 1466.185 | 1332.16  | 1393.063 |
| 176 | 45 | Feminino  |          | 0  | muito ativo  | 43.31414 | 1255.82  | 1424.609 | 1690.99  | 1660.429 |
| 177 | 32 | Feminino  | 280      | 8  | insuf. ativo | 26.66667 | 885.31   | 1098.04  | 742.5    | 909.566  |
| 178 | 34 | Masculino | 186      | 5  | ativo        | 26.72993 | 2911.11  | 2702.496 | 2254.09  | 2053.081 |
| 179 | 33 | Feminino  | 186      | 5  | muito ativo  | 21.55102 | 1575.85  | 1690.999 | 1197.6   | 1288.342 |
| 180 | 79 | Masculino | 415      | 1  | sedentário   | 25.64892 | 686.155  | 911.7598 | 476.76   | 660.968  |
| 181 | 70 | Feminino  | 415      | 1  | sedentário   | 31.88776 | 1989.18  | 2018.878 | 1199.61  | 1289.927 |
| 182 | 42 | Masculino | 172      | 4  | ativo        | 20.2449  | 1347.79  | 1502.462 | 1505.55  | 1524.235 |
| 183 | 35 | Feminino  | 172      | 4  | sedentário   | 29.38476 | 1186.76  | 1365.386 | 842.81   | 996.9706 |
| 184 | 47 | Feminino  | 621.6667 | 6  | ativo        | 22.47659 | 1676.57  | 1772.418 | 1367.45  | 1420.087 |
| 185 | 71 | Masculino | 481.6667 | 0  | ativo        | 17.00882 | 1090.98  | 1282.082 | 1033.24  | 1156.412 |
| 186 | 64 | Feminino  | 481.6667 | 0  | muito ativo  | 28.8     | 449.98   | 677.3859 | 539.7    | 723.6912 |
| 187 | 69 | Masculino | 762.5    | 4  | ativo        | 23.2438  | 2969.17  | 2743.798 | 2523.57  | 2231.95  |
| 188 | 40 | Masculino | 150      | 11 | muito ativo  | 32.5771  | 1952.4   | 1990.334 | 2682.23  | 2334.976 |
| 189 | 37 | Feminino  | 150      | 11 | ativo        | 24.08822 | 1997.71  | 2025.481 | 1959.85  | 1851.451 |
| 190 | 32 | Feminino  |          |    | ativo        | 29.31986 | 1063.37  | 1257.791 | 741.73   | 908.3748 |
| 191 | 74 | Feminino  | 800      | 4  | insuf. ativo | 22.89282 | 1113.41  | 1295.767 | 1557.06  | 1517.881 |
| 192 | 20 | Masculino | 750      | 11 | sedentário   | 27.42857 | 4512.14  | 3786.178 | 2505.17  | 2219.896 |
| 193 | 68 | Feminino  | 300.3333 | 4  | insuf. ativo | 21.45727 | 1473.985 | 1607.51  | 1331.665 | 1379.705 |
| 194 | 84 | Masculino | 285      | 2  | sedentário   | 27.04164 | 1684.415 | 1761.219 | 1524.535 | 1538.236 |
| 195 | 81 | Feminino  | 285      | 2  | insuf. ativo | 20.82999 | 1307.735 | 1468.627 | 1341.805 | 1388.492 |
| 196 | 40 | Feminino  | 316.6667 | 8  | muito ativo  | 24.97399 | 2079.72  | 2088.667 | 2047.8   | 1912.474 |
| 197 | 31 | Feminino  | 200      | 6  | sedentário   | 19.53125 | 1631.42  | 1736.051 | 1831.48  | 1761.126 |
| 198 | 28 | Feminino  | 160      | 11 | muito ativo  | 31.18459 | 1133.18  | 1318.958 | 630.51   | 808.6199 |
| 199 | 60 | Feminino  | 415      | 2  | insuf. ativo | 23.18339 | 1101.41  | 1291.222 | 1137.76  | 1240.854 |
| 200 | 49 | Feminino  | 505      | 8  | insuf. ativo | 24.00549 | 1657.44  | 1725.445 | 1715.455 | 1606.859 |
| 201 | 31 | Masculino | 433.3333 | 8  | ativo        | 29.5858  | 1083.885 | 1274.63  | 947.31   | 1085.301 |
| 202 | 80 | Feminino  | 59.28571 | 11 | sedentário   | 21.79164 | 926.485  | 1113.893 | 973.345  | 1097.201 |
| 203 | 64 | Feminino  |          | 1  | ativo        | 16.40625 | 1145.955 | 1329.87  | 851.48   | 1001.036 |
| 204 | 33 | Masculino | 600      | 10 | insuf. ativo | 21.22634 | 1921.44  | 1966.218 | 1747.87  | 1701.441 |

|     |    |           |          |     |              |          |          |          |          |          |
|-----|----|-----------|----------|-----|--------------|----------|----------|----------|----------|----------|
| 205 | 50 | Masculino | 612      | 8   | ativo        | 26.89232 | 2032.9   | 2052.661 | 1211.63  | 1299.391 |
| 206 | 21 | Masculino | 563      | 3   | ativo        | 20.57143 | 2857.6   | 2664.268 | 2477     | 2201.4   |
| 207 | 42 | Masculino | 200      | 0   | muito ativo  | 24.21875 | 1929.72  | 1972.675 | 1408.13  | 1451.026 |
| 208 | 78 | Masculino |          | 4   | sedentário   | 29.75778 | 825.13   | 1042.68  | 1202.12  | 1291.905 |
| 209 | 47 | Masculino | 700      | 11  | muito ativo  | 26.3656  | 709.12   | 933.7317 | 533.73   | 717.9986 |
| 210 | 42 | Feminino  | 700      | 11  | insuf. ativo | 27.68878 | 1226.46  | 1399.514 | 1079.65  | 1194.151 |
| 211 | 58 | Masculino | 933.3333 | 3   | sedentário   | 24.91349 | 1865.245 | 1917.335 | 1455.09  | 1486.129 |
| 212 | 59 | Feminino  | 933.3333 | 3   | insuf. ativo | 24.45606 | 1762.5   | 1834.618 | 1488.42  | 1511.415 |
| 213 | 25 | Feminino  | 933.3333 | 3   | sedentário   | 21.51386 | 1992.89  | 1880.885 | 1666.94  | 1610.772 |
| 214 | 43 | Feminino  | 300      | 11  | insuf. ativo | 23.61275 | 896.84   | 1108.149 | 998.915  | 1125.166 |
| 215 | 66 | Masculino | 368.8    | 12  | sedentário   | 35.55556 | 1946.61  | 1983.332 | 1411.115 | 1450.151 |
| 216 | 49 | Masculino | 366.6667 | 10  | sedentário   | 25.10239 | 3001.105 | 2755.99  | 1936.56  | 1834.907 |
| 217 | 20 | Masculino | 366.6667 | 10  | sedentário   | 22.15265 | 1908.73  | 1892.365 | 1651.91  | 1593.961 |
| 218 | 47 | Feminino  | 366.6667 | 10  | ativo        | 21.28743 | 1246.415 | 1361.731 | 1025.035 | 1145.651 |
| 219 | 73 | Feminino  | 263.75   | 3   | insuf. ativo | 24.21875 | 1332.35  | 1487.688 | 1141.105 | 1243.517 |
| 220 | 40 | Masculino | 390      | 11  | ativo        | 28.3737  | 2483.2   | 2392.172 | 1999.89  | 1879.316 |
| 221 | 35 | Feminino  | 390      | 11  | insuf. ativo | 22.03857 | 1492.365 | 1568.867 | 1176.48  | 1268.702 |
| 222 | 20 | Feminino  | 627.6667 | 7   | sedentário   | 21.78649 | 3154.89  | 2874.74  | 2009.4   | 1885.913 |
| 223 | 53 | Masculino | 1717.5   | 0.5 | muito ativo  | 19.66231 | 1553.075 | 1671.05  | 1518.965 | 1529.186 |
| 224 | 52 | Feminino  | 1717.5   | 0.5 | muito ativo  | 20.56933 | 1284.865 | 1442.45  | 1335.415 | 1371.727 |
| 225 | 80 | Feminino  | 420      | 0   | sedentário   | 23.7037  | 881.38   | 1094.447 | 1298.97  | 1367.485 |
| 226 | 53 | Feminino  | 611.3333 | 8   | insuf. ativo | 22.21368 | 972.69   | 1176.89  | 1393.36  | 1418.498 |
| 227 | 48 | Masculino | 333.3333 | 8   | ativo        | 23.10843 | 1629.725 | 1679.421 | 1118.665 | 1186.971 |
| 228 | 25 | Masculino | 333.3333 | 8   | sedentário   | 27.71768 | 1256.56  | 1425.153 | 1117.29  | 1206.316 |
| 229 | 42 | Feminino  | 333.3333 | 8   | insuf. ativo | 22.65625 | 1032.91  | 1214.083 | 935.655  | 1038.019 |
| 230 | 21 | Feminino  | 333.3333 | 8   | sedentário   | 20.70082 | 1515.01  | 1641.292 | 967.92   | 1102.589 |
| 231 | 77 | Masculino | 164      | 4   | sedentário   | 23.23346 | 772.08   | 980.8644 | 738.825  | 889.4383 |
| 232 | 81 | Feminino  | 164      | 4   | sedentário   | 24.7666  | 671.94   | 896.1847 | 672.575  | 839.7427 |
| 233 | 58 | Masculino | 334.2857 | 3   | ativo        | 33.20313 | 1876.605 | 1928.697 | 1551.995 | 1528.104 |
| 234 | 51 | Feminino  | 334.2857 | 3   | sedentário   | 27.92667 | 1496.01  | 1607.72  | 1449.1   | 1471.881 |
| 235 | 31 | Feminino  | 334.2857 | 3   | ativo        | 21.48438 | 2513.48  | 2414.497 | 2020.3   | 1893.466 |
| 236 | 21 | Feminino  | 334.2857 | 3   | sedentário   | 17.6693  | 1976.7   | 2009.205 | 1654.54  | 1633.966 |
| 237 | 61 | Feminino  | 320.6667 | 8   | sedentário   | 25.33333 | 1360.39  | 1513.042 | 1058.22  | 1176.775 |
| 238 | 43 | Feminino  | 59.42857 | 4   | sedentário   | 16.79688 | 1063.2   | 1257.651 | 710.68   | 881.2697 |
| 239 | 38 | Feminino  | 345.7143 | 8   | muito ativo  | 32.95068 | 1671.375 | 1702.181 | 1375.925 | 1392.878 |
| 240 | 65 | Masculino | 2950     | 10  | muito ativo  | 23.71185 | 2005.665 | 2030.025 | 1860.38  | 1781.079 |
| 241 | 31 | Feminino  | 200      | 11  | muito ativo  | 35.15625 | 1109.87  | 1298.624 | 1620.98  | 1609.472 |
| 242 | 62 | Masculino | 324.8    | 4   | sedentário   | 17.30104 | 1390.175 | 1523.031 | 885.46   | 1033.284 |
| 243 | 48 | Masculino | 1618.75  | 9   | ativo        | 25.60554 | 2529.425 | 2408.436 | 1889.74  | 1795.644 |
| 244 | 22 | Masculino | 1618.75  | 9   | muito ativo  | 23.87543 | 2923.62  | 2711.151 | 1971.12  | 1766.039 |
| 245 | 60 | Feminino  | 350      | 11  | sedentário   | 29.0006  | 1475.51  | 1608.798 | 1297.14  | 1366.07  |

|     |    |           |          |    |              |          |          |          |          |          |
|-----|----|-----------|----------|----|--------------|----------|----------|----------|----------|----------|
| 246 | 74 | Feminino  | 82.4     | 13 | ativo        | 23.11111 | 1332.56  | 1487.147 | 1596.45  | 1590.652 |
| 247 | 27 | Masculino | 975      | 10 | muito ativo  | 24.60973 | 2834.535 | 2647.217 | 2642.28  | 2303.838 |
| 248 | 30 | Feminino  | 103.75   | 2  | sedentário   | 20.76124 | 1448.79  | 1563.343 | 1245.845 | 1325.196 |
| 249 | 61 | Masculino |          | 9  | ativo        | 22.86237 | 1314.03  | 1473.714 | 1499.005 | 1517.428 |
| 250 | 21 | Feminino  | 235      | 11 | muito ativo  | 24.13602 | 2046.03  | 2062.776 | 1675.98  | 1649.549 |
| 251 | 62 | Feminino  | 333.3333 | 5  | sedentário   | 25.29938 | 1410.935 | 1555.243 | 1312.225 | 1370.603 |
| 252 | 58 | Feminino  | 30       | 10 | muito ativo  | 21.63115 | 2624.815 | 2494.024 | 1969.825 | 1856.804 |
| 253 | 79 | Feminino  | 500      | 4  | sedentário   | 26.02617 | 2080.075 | 1943.814 | 2277.82  | 1814.02  |
| 254 | 71 | Masculino | 440      | 12 | sedentário   | 24.22145 | 800.61   | 1018.502 | 779.885  | 942.2878 |
| 255 | 87 | Feminino  | 140      | 3  | sedentário   | 23.11111 | 1747.67  | 1829.272 | 1655.29  | 1634.512 |
| 256 | 92 | Feminino  | 560      | 6  | sedentário   | 23.50781 | 594.13   | 822.4521 | 849.34   | 1002.572 |
| 257 | 57 | Masculino | 135.5556 | 3  | ativo        | 25.90431 | 978.48   | 1181.99  | 899.465  | 1045.212 |
| 258 | 30 | Feminino  | 135.5556 | 3  | ativo        | 22.06035 | 1057.21  | 1252.25  | 1251.645 | 1324.272 |
| 259 | 79 | Masculino | 522.5    | 4  | sedentário   | 25.34435 | 1383.93  | 1531.676 | 1355.245 | 1410.319 |
| 260 | 69 | Feminino  | 522.5    | 4  | sedentário   | 25.33333 | 1278.7   | 1435.112 | 1046.285 | 1165.471 |
| 261 | 49 | Masculino | 1700     | 11 | sedentário   | 26.3656  | 2333.245 | 2267.915 | 1939.225 | 1826.452 |
| 262 | 46 | Feminino  | 433.3333 | 8  | muito ativo  | 20.28123 | 1969.825 | 2001.974 | 1605.945 | 1594.168 |
| 263 | 64 | Feminino  | 600      | 8  | ativo        | 24.14152 | 821.295  | 1038.914 | 1173.965 | 1261.249 |
| 264 | 62 | Masculino | 335      | 5  | ativo        | 24.16327 | 1634.15  | 1733.276 | 1489.83  | 1472.219 |
| 265 | 77 | Masculino | 1166.667 | 13 | ativo        | 23.73866 | 2017.8   | 2034.337 | 1619.835 | 1594.969 |
| 266 | 75 | Feminino  | 1166.667 | 13 | insuf. ativo | 32.03125 | 777.515  | 995.4204 | 928.185  | 1068.921 |
| 267 | 64 | Masculino | 1564     | 4  | ativo        | 19.26717 | 1747.76  | 1829.344 | 1834.27  | 1763.106 |
| 268 | 61 | Feminino  | 1564     | 4  | sedentário   | 30.48316 | 1199.17  | 1376.079 | 1124.05  | 1229.889 |
| 269 | 37 | Feminino  |          | 13 | muito ativo  | 20.70313 | 1206.705 | 1355.048 | 1507.68  | 1467.631 |
| 270 | 41 | Masculino |          | 13 | muito ativo  | 23.12062 | 1383.05  | 1532.019 | 1477.3   | 1503.13  |
| 271 | 67 | Masculino | 206      | 7  | insuf. ativo | 26.53376 | 2347.4   | 2291.307 | 2631.94  | 2302.492 |
| 272 | 34 | Feminino  | 2500     | 13 | sedentário   | 25.65437 | 898.59   | 1102.793 | 1085.915 | 1150.232 |
| 273 | 61 | Masculino | 700      | 11 | sedentário   | 28.40055 | 1393.445 | 1539.376 | 1479.825 | 1491.966 |
| 274 | 62 | Masculino |          | 11 | muito ativo  | 29.04657 | 1600.74  | 1711.219 | 923.3    | 1065.32  |
| 275 | 53 | Masculino | 1333.333 | 11 | muito ativo  | 26.67487 | 1150.16  | 1333.719 | 646.47   | 823.246  |
| 276 | 54 | Feminino  | 1333.333 | 11 | ativo        | 23.30906 | 1327.795 | 1481.29  | 1201.51  | 1284.522 |
| 277 | 30 | Feminino  | 1333.333 | 11 | insuf. ativo | 17.21109 | 1312.89  | 1473.051 | 1274.01  | 1348.143 |
| 278 | 77 | Masculino | 415      | 11 | ativo        | 27.92969 | 1825.88  | 1891.25  | 2140.87  | 1976.333 |
| 279 | 50 | Feminino  |          | 12 | sedentário   | 24.97704 | 825.615  | 1040.281 | 817.085  | 899.2775 |
| 280 | 61 | Feminino  | 433.3333 | 12 | insuf. ativo | 23.37258 | 1506.02  | 1633.912 | 875.68   | 1025.063 |
| 281 | 30 | Feminino  | 2000     | 13 | insuf. ativo | 27.68166 | 1420.13  | 1562.934 | 1145.82  | 1247.285 |
| 282 | 77 | Feminino  | 566.6667 | 5  | insuf. ativo | 36       | 1038.44  | 1235.77  | 1024.85  | 1149.546 |
| 283 | 69 | Feminino  | 253.75   | 5  | ativo        | 33.29865 | 1366.9   | 1494.317 | 864.905  | 1011.086 |
| 284 | 57 | Feminino  | 400      | 4  | ativo        | 20.44444 | 884      | 1096.843 | 840.6    | 995.0725 |
| 285 | 64 | Masculino | 915      | 8  | sedentário   | 28.22839 | 1216.21  | 1390.724 | 1116.16  | 1223.564 |
| 286 | 77 | Feminino  | 457.5    | 1  | insuf. ativo | 24.88889 | 1103.065 | 1280.739 | 1070.735 | 1179.179 |

|     |    |           |          |     |              |          |          |          |          |          |
|-----|----|-----------|----------|-----|--------------|----------|----------|----------|----------|----------|
| 287 | 71 | Feminino  | 415      | 1   | insuf. ativo | 27.34375 | 833.41   | 1050.341 | 1543.46  | 1552.403 |
| 288 | 56 | Feminino  |          |     | insuf. ativo | 18.75    | 1072.03  | 1265.43  | 965.34   | 1100.446 |
| 289 | 67 | Feminino  | 3000     | 4   | ativo        | 33.29865 | 1885.67  | 1938.251 | 1426.24  | 1464.728 |
| 290 | 64 | Feminino  | 166.6667 |     | muito ativo  | 28.125   | 1014.04  | 1214.105 | 584.98   | 766.4156 |
| 291 | 70 | Masculino | 600      | 11  | sedentário   | 21.04805 | 2111.1   | 2112.701 | 1627.2   | 1614.021 |
| 292 | 75 | Masculino | 252.5    | 7   | sedentário   | 27.54821 | 1934.755 | 1970.964 | 1738.51  | 1686.133 |
| 293 | 65 | Feminino  | 252.5    | 7   | sedentário   | 23.87512 | 1741.145 | 1805.303 | 1270.85  | 1318.887 |
| 294 | 64 | Feminino  | 665.5    | 1   | sedentário   | 29.38476 | 1537.895 | 1653.179 | 1127.97  | 1232.328 |
| 295 | 32 | Feminino  |          | 3   | insuf. ativo | 17.71542 | 984.62   | 1187.846 | 865.78   | 1016.629 |
| 296 | 70 | Feminino  | 1707.5   | 8   | sedentário   | 28.76397 | 1742.62  | 1818.865 | 1481.235 | 1498.773 |
| 297 | 50 | Masculino | 175      | 2   | insuf. ativo | 22.58955 | 2024.23  | 2039.99  | 1820.47  | 1753.13  |
| 298 | 48 | Feminino  | 175      | 2   | sedentário   | 30.48669 | 4475.645 | 3702.211 | 3318.32  | 2607.042 |
| 299 | 54 | Feminino  | 600      | 2   | insuf. ativo | 19.81785 | 1650.21  | 1745.94  | 1545.015 | 1543.672 |
| 300 | 48 | Feminino  | 833.3333 | 4   | insuf. ativo | 28.39872 | 1316.39  | 1462.073 | 1118.81  | 1212.007 |
| 301 | 71 | Feminino  | 266.6667 | 3   | insuf. ativo | 31.21748 | 1290.295 | 1453.383 | 1020.435 | 1145.424 |
| 302 | 38 | Masculino | 500      | 11  | ativo        | 23.98687 | 2604.86  | 2481.516 | 1639.26  | 1622.829 |
| 303 | 32 | Feminino  | 500      | 11  | ativo        | 24.56747 | 2046.705 | 2021.963 | 1156.345 | 1247.197 |
| 304 | 29 | Masculino | 376      | 4   | muito ativo  | 22.9854  | 1787.86  | 1861.193 | 1666.25  | 1642.483 |
| 305 | 32 | Feminino  | 376      | 4   | ativo        | 24.23823 | 1675.19  | 1733.833 | 854.55   | 1006.979 |
| 306 | 60 | Feminino  |          | 2   | sedentário   | 22.22222 | 1168.775 | 1336.685 | 823.34   | 938.5187 |
| 307 | 24 | Feminino  | 225      | 7   | ativo        | 27.43484 | 2749.26  | 2318.115 | 1210.28  | 1254.934 |
| 308 | 46 | Feminino  | 83       | 2   | ativo        | 21.48438 | 954.78   | 1140.211 | 731.11   | 863.1335 |
| 309 | 61 | Masculino | 666      | 2   | ativo        | 25.28257 | 2364.73  | 2304.248 | 2389.05  | 2143.302 |
| 310 | 23 | Masculino | 675      | 6   | ativo        | 20.44914 | 1848.46  | 1909.038 | 1815.6   | 1749.844 |
| 311 | 20 | Masculino | 675      | 6   | ativo        | 22.30935 | 1387.27  | 1535.546 | 1230.67  | 1314.335 |
| 312 | 75 | Masculino | 276.6667 | 0.5 | sedentário   | 26.6782  | 484.58   | 712.8428 | 461.59   | 648.0192 |
| 313 | 21 | Feminino  | 666.6667 | 10  | ativo        | 20.93664 | 1417.76  | 1560.963 | 1645.69  | 1627.519 |
| 314 | 46 | Feminino  | 253.75   | 6   | ativo        | 21.33333 | 930.38   | 1139.027 | 720.64   | 890.158  |
| 315 | 91 | Masculino | 1150     | 10  | sedentário   | 29.05475 | 1545.54  | 1666.287 | 1439.85  | 1474.997 |
| 316 | 91 | Feminino  | 1150     | 10  | sedentário   | 23.71185 | 1527.8   | 1651.776 | 1609.4   | 1600.991 |
| 317 | 72 | Masculino | 1107.5   | 11  | ativo        | 23.4375  | 1837.045 | 1887.841 | 1536.335 | 1544.197 |
| 318 | 82 | Feminino  | 1107.5   | 11  | insuf. ativo | 24.44444 | 1078.5   | 1221.303 | 1067.775 | 1149.234 |
| 319 | 35 | Feminino  | 710      | 13  | ativo        | 25.4017  | 2207.73  | 2186.235 | 1918.28  | 1822.369 |
| 320 | 35 | Feminino  | 710      | 13  | ativo        | 24.39106 | 1083.36  | 1275.393 | 1043.07  | 1164.439 |
| 321 | 80 | Masculino | 6400     | 11  | ativo        | 29.80277 | 1311.11  | 1435.723 | 1608.19  | 1566.151 |
| 322 | 49 | Feminino  | 300      | 4   | ativo        | 22.22222 | 1458.65  | 1579.986 | 1060.17  | 1177.403 |
| 323 | 85 | Feminino  | 415      | 4   | sedentário   | 22.7583  | 1491.2   | 1621.726 | 1873.6   | 1790.933 |
| 324 | 78 | Masculino | 760      | 4   | sedentário   | 27.35884 | 1540.11  | 1661.849 | 1543.28  | 1552.269 |
| 325 | 79 | Feminino  | 760      | 4   | muito ativo  | 20.82999 | 2355.26  | 2297.179 | 1946.19  | 1841.911 |
| 326 | 50 | Feminino  | 433.3333 | 13  | ativo        | 20.19509 | 1090.025 | 1279.569 | 965.33   | 1095.697 |
| 327 | 91 | Masculino | 1000     | 10  | insuf. ativo | 20.76124 | 1598.88  | 1679.734 | 1543.21  | 1492.144 |



|     |    |           |          |     |              |          |          |          |          |          |
|-----|----|-----------|----------|-----|--------------|----------|----------|----------|----------|----------|
| 328 | 84 | Feminino  | 1000     | 10  | insuf. ativo | 25.40282 | 1853.06  | 1912.574 | 1825.87  | 1740.974 |
| 329 | 55 | Feminino  | 550      | 11  | muito ativo  | 30.0215  | 1423.785 | 1495.452 | 781.105  | 922.4834 |
| 330 | 31 | Feminino  | 550      | 11  | muito ativo  | 22.9854  | 2347.94  | 2291.71  | 1160.35  | 1258.851 |
| 331 | 62 | Feminino  | 2205     | 10  | muito ativo  | 34.54735 | 1296     | 1458.76  | 1085.34  | 1198.751 |
| 332 | 72 | Feminino  | 415      | 4   | ativo        | 24.4646  | 1382.67  | 1531.701 | 926.65   | 1068.133 |
| 333 | 81 | Feminino  | 1050     | 11  | insuf. ativo | 27.94215 | 1185.64  | 1364.42  | 916.32   | 1059.451 |
| 334 | 50 | Masculino | 3500     | 13  | muito ativo  | 23.5102  | 1313.86  | 1473.871 | 1827.33  | 1758.18  |
| 335 | 64 | Feminino  | 240      | 8   | muito ativo  | 23.18339 | 2134.66  | 2130.696 | 1388.2   | 1435.896 |
| 336 | 65 | Masculino | 3315     | 11  | muito ativo  | 31.67347 | 1423.85  | 1563.198 | 1260.435 | 1327.886 |
| 337 | 64 | Feminino  | 3315     | 11  | ativo        | 23.95123 | 1026.16  | 1224.879 | 1166.84  | 1264.006 |
| 338 | 68 | Masculino | 1333.333 | 11  | ativo        | 25.60554 | 1147.525 | 1325.698 | 1201.43  | 1279.392 |
| 339 | 39 | Masculino | 500      | 11  | muito ativo  | 27.7551  | 1199.44  | 1375.927 | 789.7    | 938.8343 |
| 340 | 39 | Feminino  | 500      | 11  | muito ativo  | 25.88758 | 1690     | 1756.724 | 1255.77  | 1310.465 |
| 341 | 72 | Masculino | 857.5    | 0.5 | sedentário   | 22.86254 | 2067.895 | 2079.427 | 1572.075 | 1571.424 |
| 342 | 65 | Feminino  | 857.5    | 0.5 | insuf. ativo | 22.76944 | 1352     | 1503.851 | 1494.795 | 1513.894 |
| 343 | 27 | Masculino | 569      | 8   | ativo        | 24.22145 | 4750.57  | 3939.413 | 2891.52  | 2468.537 |
| 344 | 24 | Masculino | 569      | 8   | sedentário   | 22.14533 | 3078.66  | 2821.206 | 2352.86  | 2119.239 |
| 345 | 53 | Feminino  | 569      | 8   | insuf. ativo | 24.00549 | 1631.53  | 1736.14  | 1221.95  | 1307.498 |
| 346 | 97 | Masculino | 674.6667 | 3   | sedentário   | 17.30104 | 975.64   | 1179.801 | 1030.06  | 1153.811 |
| 347 | 41 | Masculino |          | 13  | sedentário   | 28.71972 | 1894.35  | 1937.666 | 1370.305 | 1416.551 |
| 348 | 40 | Feminino  |          | 13  | insuf. ativo | 18.64535 | 1698.91  | 1788.725 | 1077.235 | 1180.305 |
| 349 | 27 | Feminino  | 476      | 7   | sedentário   | 26.42357 | 2978.77  | 2750.61  | 3067.49  | 2578.931 |
| 350 | 23 | Masculino | 476      | 7   | sedentário   | 19.11075 | 3952.71  | 3419.202 | 3430.27  | 2801.558 |
| 351 | 32 | Feminino  | 200      |     | insuf. ativo | 24.03461 | 1625.18  | 1731.008 | 3367.94  | 2763.755 |
| 352 | 21 | Feminino  | 200      |     | sedentário   | 18.73278 | 2747.89  | 2585.394 | 2343.6   | 2113.067 |
| 353 | 65 | Feminino  | 207.5    | 0   | insuf. ativo | 36.79017 | 931.445  | 1139.903 | 950.175  | 1086.847 |
| 354 | 61 | Feminino  | 457.5    | 11  | muito ativo  | 26.7094  | 678.71   | 893.6019 | 660.085  | 830.0723 |
| 355 | 29 | Masculino | 533.3333 | 11  | ativo        | 32.87197 | 1591.58  | 1699.777 | 1047.78  | 1163.498 |
| 356 | 27 | Feminino  | 533.3333 | 11  | insuf. ativo | 20.20202 | 918.49   | 1124.651 | 767.205  | 919.687  |
| 357 | 35 | Masculino | 167.125  | 8   | ativo        | 19.94321 | 2723.67  | 2567.889 | 2172.72  | 1998.025 |
| 358 | 55 | Feminino  | 167.125  | 8   | muito ativo  | 31.23941 | 1253.83  | 1422.912 | 1083.44  | 1197.216 |
| 359 | 48 | Masculino | 509.2    | 6   | sedentário   | 26.14928 | 1858.265 | 1831.127 | 1220.295 | 1255.282 |
| 360 | 45 | Feminino  | 509.2    | 6   | sedentário   | 23.86359 | 1704.58  | 1789.419 | 1203.115 | 1272.906 |
| 361 | 22 | Feminino  | 509.2    | 6   | insuf. ativo | 19.81405 | 2211.65  | 2184.911 | 1522.42  | 1534.082 |
| 362 | 21 | Feminino  | 509.2    | 6   | insuf. ativo | 23.82367 | 1763.13  | 1716.574 | 877.145  | 946.3934 |
| 363 | 63 | Masculino | 230      | 1   | insuf. ativo | 32.49055 | 2324.745 | 2274.308 | 1392.645 | 1437.118 |
| 364 | 38 | Feminino  | 165      | 9   | insuf. ativo | 23.72529 | 928.14   | 1136.999 | 665.63   | 840.6948 |
| 365 | 81 | Feminino  | 232.5    | 0   | insuf. ativo | 37.61574 | 1059.005 | 1230.327 | 901.205  | 1012.775 |
| 366 | 41 | Masculino | 208.3333 | 6   | ativo        | 29.35752 | 2082.315 | 2089.898 | 2379.62  | 2123.375 |
| 367 | 41 | Feminino  | 208.3333 | 6   | sedentário   | 20.95727 | 1939.03  | 1957.998 | 1568.885 | 1566.147 |
| 368 | 68 | Feminino  | 525      | 1   | insuf. ativo | 26.87817 | 547.995  | 775.2935 | 678.71   | 849.6779 |

|     |    |           |          |     |              |          |          |          |          |          |
|-----|----|-----------|----------|-----|--------------|----------|----------|----------|----------|----------|
| 369 | 41 | Masculino | 112.5    | 5   | muito ativo  | 17.63085 | 1489.83  | 1620.599 | 2629.97  | 2301.217 |
| 370 | 40 | Feminino  | 112.5    | 5   | ativo        | 19.37716 | 1395.95  | 1542.793 | 1060.89  | 1178.945 |
| 371 | 73 | Feminino  | 465      | 5   | insuf. ativo | 29.6875  | 754.62   | 976.1591 | 833.03   | 975.0731 |
| 372 | 23 | Feminino  | 350      | 11  | insuf. ativo | 19.53125 | 3908.04  | 3389.414 | 2938.03  | 2497.878 |
| 373 | 29 | Masculino | 1666.667 | 11  | sedentário   | 25.05931 | 1051.955 | 1247.508 | 775.725  | 935.6463 |
| 374 | 52 | Masculino | 500      | 11  | ativo        | 26.1752  | 841.36   | 1057.683 | 981.8    | 1114.098 |
| 375 | 46 | Feminino  | 500      | 11  | sedentário   | 39.47681 | 1278.33  | 1417.155 | 1103.39  | 1205.802 |
| 376 | 63 | Masculino | 465      | 1   | sedentário   | 21.30395 | 382.23   | 606.6334 | 654.27   | 830.3636 |
| 377 | 62 | Feminino  | 465      | 1   | ativo        | 24.03461 | 889.89   | 1102.223 | 913.36   | 1056.958 |
| 378 | 30 | Feminino  | 800      | 5   | muito ativo  | 29.38476 | 1804.37  | 1871.797 | 1402.13  | 1445.766 |
| 379 | 70 | Feminino  | 443.3333 | 3   | muito ativo  | 16       | 1436.93  | 1576.885 | 1509.07  | 1526.858 |
| 380 | 44 | Masculino | 276.6667 | 3   | muito ativo  | 26.12245 | 3291.93  | 2882.997 | 3047.435 | 2539.214 |
| 381 | 62 | Masculino | 371.6667 | 4   | sedentário   | 22.72044 | 1796.565 | 1863.241 | 1658.45  | 1587.915 |
| 382 | 78 | Masculino | 200      | 4   | insuf. ativo | 23.03005 | 2013.72  | 1847.434 | 1070.425 | 1148.261 |
| 383 | 88 | Feminino  | 200      | 4   | sedentário   | 20.88889 | 1154.85  | 1330.234 | 689.375  | 862.0856 |
| 384 | 34 | Feminino  | 400      | 12  | muito ativo  | 33.49768 | 3603.71  | 3184.377 | 2330.07  | 2104.037 |
| 385 | 63 | Feminino  | 805      | 4   | insuf. ativo | 35.84079 | 1176.67  | 1356.307 | 1385.34  | 1432.942 |
| 386 | 64 | Masculino | 707.5    | 4   | sedentário   | 32.32323 | 1341.48  | 1478.585 | 925.745  | 1041.516 |
| 387 | 26 | Masculino | 1166.667 | 12  | insuf. ativo | 23.67126 | 2356.5   | 2298.105 | 1876.43  | 1792.93  |
| 388 | 28 | Masculino | 17.14286 | 4   | insuf. ativo | 23.87512 | 1829.065 | 1893.426 | 1078.345 | 1186.174 |
| 389 | 53 | Feminino  | 17.14286 | 4   | muito ativo  | 24.16716 | 1239.845 | 1410.166 | 1041.57  | 1163.167 |
| 390 | 56 | Feminino  | 1032.5   | 4   | insuf. ativo | 27.33991 | 779.01   | 985.7531 | 703.81   | 853.4991 |
| 391 | 65 | Feminino  |          |     | insuf. ativo | 37.09869 | 459.42   | 687.1028 | 697.27   | 869.2562 |
| 392 | 46 | Feminino  |          | 13  | sedentário   | 21.79931 | 868.37   | 1071.485 | 636.89   | 814.3367 |
| 393 | 62 | Masculino | 266.6667 | 4   | ativo        | 25.51021 | 1749.89  | 1831.04  | 1393.09  | 1439.613 |
| 394 | 74 | Feminino  | 400      | 0.5 | sedentário   | 24.4646  | 1072.18  | 1252.099 | 842.88   | 990.0171 |
| 395 | 22 | Masculino | 500      | 11  | muito ativo  | 23.67126 | 2620.09  | 2492.635 | 2624.03  | 2297.369 |
| 396 | 57 | Feminino  | 337.5    | 11  | ativo        | 30.0621  | 1314.62  | 1465.481 | 1015.13  | 1115.353 |
| 397 | 35 | Masculino | 250      | 5   | ativo        | 28.40551 | 1764.85  | 1839.146 | 1236.955 | 1317.536 |
| 398 | 40 | Feminino  | 250      | 5   | insuf. ativo | 26.95313 | 1757.435 | 1778.35  | 1679.035 | 1571.409 |
| 399 | 75 | Masculino | 310      | 0.5 | sedentário   | 25.55933 | 965.33   | 1170.546 | 1004.53  | 1132.86  |
| 400 | 67 | Feminino  | 310      | 0.5 | sedentário   | 23.71185 | 1350.51  | 1504.748 | 1007.05  | 1134.933 |
| 401 | 81 | Feminino  | 3500     | 11  | ativo        | 27.39226 | 687.875  | 899.7443 | 788.875  | 944.1064 |
| 402 | 49 | Feminino  | 116.6667 | 6   | muito ativo  | 29.66655 | 1382.46  | 1523.984 | 1092.3   | 1187.538 |
| 403 | 20 | Feminino  | 116.6667 | 6   | ativo        | 30.47797 | 2599.485 | 2471.245 | 2047.82  | 1896.329 |
| 404 | 63 | Masculino | 306.6667 | 11  | muito ativo  | 23.18339 | 1901.825 | 1950.683 | 1308.67  | 1374.163 |
| 405 | 30 | Masculino | 1760     | 11  | muito ativo  | 27.77427 | 1352.03  | 1506.025 | 1874.5   | 1791.568 |
| 406 | 27 | Feminino  | 1760     | 11  | muito ativo  | 21.875   | 1802.98  | 1871.266 | 1341.275 | 1350.581 |
| 407 | 79 | Feminino  | 1833.333 | 4   | sedentário   | 17.56965 | 1209.655 | 1384.502 | 884.22   | 1030.272 |
| 408 | 78 | Masculino | 310      | 4   | sedentário   | 28.08163 | 4100.74  | 3517.384 | 2982.87  | 2526.053 |
| 409 | 76 | Feminino  | 310      | 4   | ativo        | 31.25    | 1992.8   | 2021.681 | 1191.67  | 1283.662 |

|     |    |           |          |     |              |          |          |          |          |          |
|-----|----|-----------|----------|-----|--------------|----------|----------|----------|----------|----------|
| 410 | 68 | Masculino | 207.5    | 4   | muito ativo  | 28.40816 | 1853.525 | 1875.319 | 1480.87  | 1489.699 |
| 411 | 62 | Masculino | 700      | 13  | ativo        | 24.4418  | 1543.55  | 1664.661 | 2154.38  | 1985.544 |
| 412 | 58 | Feminino  | 1700     | 13  | ativo        | 31.14187 | 2222.7   | 2195.698 | 2195.665 | 1987.822 |
| 413 | 71 | Masculino |          | 4   | ativo        | 22.22222 | 1534.33  | 1657.121 | 1073.64  | 1189.287 |
| 414 | 68 | Feminino  |          | 4   | insuf. ativo | 29.34129 | 1534.33  | 1657.121 | 1073.64  | 1189.287 |
| 415 | 39 | Feminino  | 140      | 11  | ativo        | 27.0538  | 1321.64  | 1479.436 | 1581.92  | 1580.787 |
| 416 | 48 | Masculino | 466.3333 | 10  | ativo        | 24.91349 | 1043.095 | 1199.657 | 977.325  | 1067.065 |
| 417 | 26 | Masculino | 466.3333 | 10  | ativo        | 28.72738 | 2418.465 | 2290.548 | 1963.25  | 1836.265 |
| 418 | 21 | Feminino  | 466.3333 | 10  | ativo        | 24.12879 | 897.9    | 1109.529 | 769.79   | 933.6073 |
| 419 | 37 | Feminino  | 850      | 13  | insuf. ativo | 23.30668 | 2162.96  | 2152.254 | 1402.11  | 1446.461 |
| 420 | 79 | Feminino  | 138.3333 | 2   | insuf. ativo | 21.48438 | 1071.65  | 1265.096 | 1029.34  | 1153.222 |
| 421 | 62 | Masculino | 703      | 4   | ativo        | 25.40282 | 1222.715 | 1284.807 | 1379.205 | 1248.792 |
| 422 | 88 | Feminino  | 703      | 4   | sedentário   | 18.42653 | 1383.18  | 1532.127 | 1440.4   | 1475.411 |
| 423 | 50 | Feminino  | 280      | 5   | ativo        | 24.16716 | 1610.645 | 1703.811 | 1305.395 | 1370.953 |
| 424 | 28 | Feminino  | 280      | 5   | muito ativo  | 24.30462 | 1062.17  | 1256.743 | 1340.62  | 1399.557 |
| 425 | 83 | Masculino | 860      | 0   | sedentário   | 19.37716 | 1734.665 | 1727.539 | 1413.81  | 1413.196 |
| 426 | 72 | Feminino  | 860      | 0   | ativo        | 20.56933 | 981.96   | 1138.381 | 797.475  | 935.8153 |
| 427 | 42 | Feminino  | 253.75   | 8   | ativo        | 25.71166 | 1411.94  | 1470.224 | 999.83   | 1116.706 |
| 428 | 26 | Feminino  | 283.3333 | 11  | insuf. ativo | 24.08822 | 3368.82  | 3023.472 | 2220.6   | 2030.483 |
| 429 | 71 | Feminino  | 6400     | 8   | ativo        | 25       | 1047.15  | 1243.479 | 986.28   | 1117.804 |
| 430 | 27 | Feminino  | 416.4286 | 5   | ativo        | 27.37966 | 1570.93  | 1686.89  | 1042.175 | 1144.837 |
| 431 | 30 | Feminino  | 100      | 6   | ativo        | 24.60973 | 1703.71  | 1792.223 | 1904.435 | 1804.555 |
| 432 | 61 | Feminino  | 150      | 0   | muito ativo  | 27.05515 | 2615.77  | 2489.483 | 2192.28  | 2011.307 |
| 433 | 83 | Masculino | 207.5    | 2   | ativo        | 23.30906 | 1021.59  | 1220.819 | 1181.7   | 1275.782 |
| 434 | 47 | Masculino | 900      | 11  | muito ativo  | 20.0692  | 1562.44  | 1680.078 | 1334.28  | 1394.691 |
| 435 | 48 | Feminino  | 900      | 11  | ativo        | 28.125   | 2799.14  | 2622.324 | 2427.74  | 2168.926 |
| 436 | 66 | Masculino | 232.5    | 8   | insuf. ativo | 28.90625 | 1035.525 | 1180.349 | 611.9    | 781.5611 |
| 437 | 66 | Masculino | 415      | 4   | sedentário   | 24.91349 | 1210.945 | 1373.89  | 1109.24  | 1211.701 |
| 438 | 62 | Masculino | 266.25   | 2   | muito ativo  | 24.60973 | 1801.845 | 1716.6   | 1914.705 | 1687.509 |
| 439 | 45 | Feminino  |          |     | insuf. ativo | 27.47563 | 1613.22  | 1721.332 | 1232.97  | 1316.137 |
| 440 | 70 | Masculino | 353.75   | 9   | ativo        | 20.70313 | 670.88   | 897.1151 | 499.32   | 684.9017 |
| 441 | 51 | Masculino | 225      | 3   | ativo        | 20.98399 | 1332.53  | 1489.622 | 1320.23  | 1383.887 |
| 442 | 54 | Feminino  | 225      | 3   | ativo        | 24.65591 | 1592.78  | 1704.76  | 1352.76  | 1408.859 |
| 443 | 20 | Feminino  | 225      | 3   | insuf. ativo | 18.9069  | 2041.22  | 2059.072 | 1909.51  | 1816.213 |
| 444 | 25 | Masculino | 298.3333 | 5   | muito ativo  | 21.45329 | 3607.465 | 3035.071 | 2898.725 | 2289.131 |
| 445 | 52 | Masculino | 307.5    | 5   | muito ativo  | 19.4674  | 3572.37  | 3163.047 | 2503.95  | 2219.097 |
| 446 | 36 | Masculino | 466.6667 | 8   | muito ativo  | 28.73467 | 3005.45  | 2769.517 | 1679.72  | 1652.262 |
| 447 | 34 | Feminino  | 466.6667 | 8   | insuf. ativo | 19.10009 | 2199.86  | 2180.273 | 1673.94  | 1648.068 |
| 448 | 33 | Feminino  | 333.3333 | 4   | insuf. ativo | 22.65625 | 922.08   | 1131.508 | 867.87   | 1018.411 |
| 449 | 33 | Feminino  | 235.7143 | 7   | muito ativo  | 22.77319 | 1617     | 1724.392 | 1446.51  | 1480.013 |
| 450 | 70 | Feminino  | 100      | 0.5 | insuf. ativo | 39.11111 | 1163.755 | 1339.484 | 1139.97  | 1214.112 |

|     |    |           |          |     |              |          |          |          |          |          |
|-----|----|-----------|----------|-----|--------------|----------|----------|----------|----------|----------|
| 451 | 47 | Feminino  | 233.3333 | 5   | insuf. ativo | 18.75    | 1978.18  | 2010.353 | 1661.83  | 1639.27  |
| 452 | 20 | Masculino | 233.3333 | 5   | ativo        | 19.53125 | 1006.41  | 1207.309 | 636.69   | 814.2934 |
| 453 | 42 | Feminino  | 766.6667 | 11  | sedentário   | 26.5625  | 1198.125 | 1363.049 | 740.21   | 904.2361 |
| 454 | 34 | Feminino  | 90       | 0   | ativo        | 32.88889 | 1142.5   | 1327.065 | 850.82   | 1003.84  |
| 455 | 59 | Masculino | 260      | 8   | ativo        | 27.82932 | 1619.08  | 1726.075 | 1373.51  | 1424.71  |
| 456 | 27 | Masculino | 260      | 8   | sedentário   | 22.89308 | 1857.45  | 1916.107 | 1478.7   | 1504.178 |
| 457 | 54 | Feminino  | 260      | 8   | ativo        | 21.71925 | 1266.7   | 1433.878 | 980.15   | 1112.732 |
| 458 | 30 | Feminino  | 260      | 8   | ativo        | 16.79688 | 637.03   | 864.3851 | 636.5    | 814.1191 |
| 459 | 81 | Feminino  | 375      | 4   | insuf. ativo | 22.95918 | 2999.64  | 2765.403 | 1978.96  | 1864.768 |
| 460 | 75 | Feminino  | 683      | 9   | sedentário   | 31.11111 | 938.725  | 1146.374 | 1223.185 | 1300.432 |
| 461 | 23 | Feminino  | 500      | 12  | insuf. ativo | 24.96494 | 1589.32  | 1701.95  | 1196.41  | 1287.403 |
| 462 | 30 | Feminino  | 500      | 12  | ativo        | 26.70362 | 2044.86  | 2061.875 | 1945.15  | 1841.185 |
| 463 | 71 | Feminino  | 1216.667 | 0.5 | insuf. ativo | 25.71166 | 1357.385 | 1487.364 | 1674.525 | 1642.854 |
| 464 | 55 | Masculino | 579      | 11  | insuf. ativo | 24.22145 | 2707.065 | 2546.019 | 3479.74  | 2550.223 |
| 465 | 81 | Feminino  | 579      | 11  | sedentário   | 33.29865 | 623.97   | 851.6743 | 555.01   | 738.225  |
| 466 | 79 | Feminino  | 382.5    | 3   | sedentário   | 21.36752 | 361.74   | 584.8606 | 631.28   | 809.3275 |
| 467 | 72 | Masculino | 292.8571 | 5   | sedentário   | 24.60973 | 1076.99  | 1074.044 | 1323.255 | 1288.303 |
| 468 | 31 | Masculino | 292.8571 | 5   | sedentário   | 25.71166 | 1318.31  | 1477.629 | 2054.65  | 1917.198 |
| 469 | 30 | Masculino | 292.8571 | 5   | ativo        | 20.67901 | 1193.12  | 1370.869 | 1079.85  | 1194.313 |
| 470 | 63 | Feminino  | 292.8571 | 5   | sedentário   | 27.81588 | 1594.585 | 1703.468 | 1130.985 | 1233.865 |
| 471 | 41 | Feminino  | 292.8571 | 5   | insuf. ativo | 32.38836 | 1152.03  | 1335.341 | 1535.95  | 1546.836 |
| 472 | 68 | Feminino  | 866.6667 | 4   | insuf. ativo | 29.29688 | 908.285  | 1085.69  | 1174.205 | 1214.124 |
| 473 | 73 | Feminino  | 363      | 4   | sedentário   | 31.25    | 1511.64  | 1638.527 | 831.79   | 987.4941 |
| 474 | 38 | Masculino | 240      | 0.5 | ativo        | 24.22145 | 2253.945 | 2076.971 | 1906.84  | 1623.188 |
| 475 | 38 | Feminino  | 240      | 0.5 | ativo        | 25.39063 | 788.625  | 992.7435 | 1048.515 | 1111.436 |
| 476 | 64 | Feminino  | 669      | 8   | ativo        | 22.40588 | 1650.25  | 1744.067 | 1205.255 | 1293.706 |
| 477 | 39 | Feminino  | 283.3333 | 6   | ativo        | 24.00549 | 435.01   | 661.9083 | 510      | 695.2275 |
| 478 | 62 | Feminino  | 4400     | 13  | muito ativo  | 22.30815 | 1215.865 | 1390.367 | 1921.61  | 1780.981 |
| 479 | 72 | Feminino  | 583.3333 | 0   | sedentário   | 46.74557 | 1012.67  | 1174.149 | 1127.785 | 1221.97  |
| 480 | 57 | Masculino | 560      | 6   | ativo        | 26.57313 | 2074.8   | 2084.891 | 1106.89  | 1216.118 |
| 481 | 28 | Masculino | 560      | 6   | sedentário   | 20.00657 | 2124.49  | 2122.934 | 964.95   | 1100.122 |
| 482 | 25 | Masculino | 560      | 6   | ativo        | 24.72518 | 1933.41  | 1975.551 | 1086.62  | 1199.785 |
| 483 | 55 | Feminino  | 560      | 6   | insuf. ativo | 22.93975 | 2863.05  | 2668.169 | 1792.27  | 1733.223 |
| 484 | 26 | Feminino  | 560      | 6   | ativo        | 16.79688 | 1926.3   | 1970.009 | 1342.13  | 1400.715 |
| 485 | 72 | Feminino  | 776.6667 | 2   | insuf. ativo | 33.6593  | 923.615  | 1132.899 | 1041.185 | 1159.144 |
| 486 | 74 | Masculino | 411.6667 | 4   | sedentário   | 22.40879 | 1750.81  | 1831.769 | 1213.8   | 1300.015 |
| 487 | 60 | Feminino  | 411.6667 | 4   | insuf. ativo | 26.37024 | 1638.945 | 1707.752 | 1637.33  | 1619.361 |
| 488 | 61 | Feminino  |          | 8   | muito ativo  | 26.17188 | 943.52   | 1150.903 | 748.29   | 914.6838 |
| 489 | 79 | Masculino | 310      | 0   | ativo        | 23.30668 | 2125.38  | 2123.613 | 1502.33  | 1521.834 |
| 490 | 78 | Feminino  | 310      | 0   | insuf. ativo | 28.53745 | 2119.94  | 2119.458 | 1726.9   | 1686.361 |
| 491 | 53 | Feminino  |          | 4   | insuf. ativo | 25.55884 | 1051.37  | 1247.209 | 816.14   | 973.9847 |

|     |    |           |          |    |              |          |          |          |          |          |
|-----|----|-----------|----------|----|--------------|----------|----------|----------|----------|----------|
| 492 | 44 | Masculino | 482.5    | 4  | muito ativo  | 19.88385 | 2309.21  | 2262.715 | 2656.6   | 2318.441 |
| 493 | 20 | Masculino | 482.5    | 4  | sedentário   | 22.14533 | 4250.17  | 3615.689 | 1754.21  | 1705.992 |
| 494 | 40 | Feminino  | 482.5    | 4  | muito ativo  | 17.96875 | 2432.63  | 2354.755 | 1398     | 1443.342 |
| 495 | 44 | Masculino | 960      | 11 | muito ativo  | 25.95156 | 4892.16  | 4029.584 | 5406.93  | 3925.168 |
| 496 | 55 | Feminino  | 683.3333 | 4  | muito ativo  | 29.04866 | 1052.605 | 1235.586 | 1046.125 | 1127.716 |
| 497 | 51 | Feminino  | 27.5     | 0  | ativo        | 23.53036 | 513.91   | 742.5694 | 425.09   | 611.7    |
| 498 | 21 | Masculino | 27.5     | 0  | ativo        | 20.74507 | 1022.9   | 1221.984 | 603.75   | 783.9028 |
| 499 | 31 | Masculino | 800      | 2  | muito ativo  | 23.62445 | 1452.72  | 1549.4   | 1426.26  | 1422.539 |
| 500 | 65 | Masculino | 316.6667 | 4  | sedentário   | 26.57313 | 1037.5   | 1234.935 | 1330.06  | 1391.175 |
| 501 | 29 | Feminino  | 212.5    | 4  | ativo        | 28.90625 | 1770.59  | 1847.495 | 1146.3   | 1247.668 |
| 502 | 65 | Masculino | 420      | 4  | sedentário   | 25.14861 | 2005.055 | 2010.282 | 1869.705 | 1786.978 |
| 503 | 61 | Feminino  | 420      | 4  | insuf. ativo | 27.88762 | 1457.265 | 1593.714 | 1176.095 | 1269.386 |
| 504 | 21 | Feminino  | 500      | 10 | insuf. ativo | 31.25    | 1433.905 | 1568.993 | 1501.365 | 1487.486 |
| 505 | 28 | Masculino | 500      | 10 | insuf. ativo | 25.71166 | 1622.545 | 1660.876 | 1254.09  | 1274.444 |
| 506 | 37 | Masculino |          | 7  | ativo        | 23.66144 | 1424.04  | 1566.184 | 1681.87  | 1653.821 |
| 507 | 69 | Feminino  | 600      | 0  | insuf. ativo | 19.56296 | 613.04   | 841      | 527.12   | 711.679  |
| 508 | 46 | Feminino  | 1040     | 0  | ativo        | 29.96878 | 591.14   | 819.5099 | 700.11   | 871.8049 |
| 509 | 25 | Feminino  | 1040     | 0  | ativo        | 20.13478 | 1016.5   | 1216.294 | 736.66   | 904.3943 |
| 510 | 84 | Masculino | 506      | 3  | ativo        | 19.94321 | 1349.35  | 1438.542 | 925.84   | 1058.49  |
| 511 | 76 | Feminino  | 506      | 3  | insuf. ativo | 28.06183 | 866.71   | 1081.007 | 912.165  | 1055.057 |
| 512 | 82 | Feminino  | 737.3333 | 2  | sedentário   | 19.14672 | 998.94   | 1200.483 | 1010.42  | 1128.711 |
| 513 | 74 | Masculino | 357.5    | 4  | insuf. ativo | 29.86055 | 773.29   | 994.3752 | 846.05   | 999.7512 |
| 514 | 78 | Feminino  | 357.5    | 4  | insuf. ativo | 26.44898 | 660.055  | 847.7603 | 702.895  | 757.175  |
| 515 | 88 | Feminino  | 1500     | 11 | insuf. ativo | 18.66667 | 1748.81  | 1830.18  | 1399.56  | 1444.526 |
| 516 | 53 | Feminino  | 1750     | 13 | ativo        | 21.04805 | 2245.22  | 2214.576 | 1507.08  | 1525.375 |
| 517 | 60 | Masculino |          | 13 | muito ativo  | 24.90641 | 2045.99  | 2062.745 | 3051.81  | 2569.161 |
| 518 | 41 | Masculino | 6500     | 13 | sedentário   | 25.45807 | 1817.47  | 1712.318 | 984.415  | 1004.381 |
| 519 | 90 | Feminino  | 715      | 4  | ativo        | 27.34375 | 862.76   | 1077.383 | 1305.33  | 1372.398 |
| 520 | 72 | Feminino  | 415      | 4  | ativo        | 19.43301 | 2468.56  | 2381.357 | 3002.64  | 2538.441 |
| 521 | 58 | Feminino  | 4700     | 13 | sedentário   | 18.42404 | 2007.85  | 2033.323 | 1602.41  | 1595.864 |
| 522 | 73 | Masculino | 366.6667 | 13 | sedentário   | 19.59184 | 1718.9   | 1789.554 | 1751.405 | 1670.323 |
| 523 | 63 | Feminino  | 416.6667 | 8  | sedentário   | 24.12879 | 929.51   | 1138.239 | 874.05   | 1023.676 |
| 524 | 64 | Feminino  | 3933.333 | 8  | ativo        | 32.88242 | 1643.685 | 1740.895 | 1612.66  | 1601.233 |
| 525 | 37 | Feminino  | 300      | 8  | insuf. ativo | 29.38476 | 716.885  | 924.4715 | 823.42   | 915.7507 |
| 526 | 34 | Feminino  | 551.6667 | 11 | ativo        | 16.609   | 2001.54  | 1910.058 | 2443.335 | 2160.2   |
| 527 | 43 | Masculino | 166.6667 | 6  | sedentário   | 26.85185 | 1362.84  | 1514.148 | 1049.965 | 1161.027 |
| 528 | 50 | Masculino | 500      | 7  | sedentário   | 26.23457 | 2850.54  | 2659.213 | 2505.98  | 2220.428 |
| 529 | 71 | Feminino  | 900      | 2  | sedentário   | 30.42185 | 617.54   | 837.1219 | 662.72   | 721.2036 |
| 530 | 66 | Feminino  | 548.3333 | 3  | insuf. ativo | 22.65625 | 1220.61  | 1388.234 | 875.355  | 1008.59  |
| 531 | 57 | Masculino | 1728.333 | 2  | ativo        | 19.1953  | 1411.925 | 1535.462 | 1358.91  | 1410.79  |
| 532 | 58 | Feminino  | 1728.333 | 2  | ativo        | 22.47659 | 1556.965 | 1673.78  | 1361     | 1414.872 |

|     |    |           |          |    |              |          |          |          |          |          |
|-----|----|-----------|----------|----|--------------|----------|----------|----------|----------|----------|
| 533 | 43 | Feminino  | 419      | 4  | muito ativo  | 24.74094 | 1404.65  | 1550.048 | 1233.13  | 1316.262 |
| 534 | 71 | Feminino  |          |    | insuf. ativo | 39.66942 | 2180.77  | 2165.79  | 1064.06  | 1181.519 |
| 535 | 51 | Masculino |          | 10 | insuf. ativo | 21.2031  | 2076.27  | 2086.02  | 1832.84  | 1762.091 |
| 536 | 88 | Feminino  |          | 13 | sedentário   | 24.97399 | 1131.34  | 1317.24  | 996.815  | 1121.468 |
| 537 | 63 | Feminino  |          | 13 | sedentário   | 25.72103 | 1050.85  | 1241.502 | 973.245  | 1100.896 |
| 538 | 60 | Feminino  |          | 13 | insuf. ativo | 23.05176 | 942.97   | 1150.308 | 1164.555 | 1242.96  |
| 539 | 62 | Masculino | 1600     | 13 | sedentário   | 31.40766 | 1338.935 | 1467.799 | 1134.525 | 1193.162 |
| 540 | 67 | Masculino | 498.3333 | 11 | sedentário   | 26.54321 | 332.77   | 553.7544 | 747.09   | 913.6239 |
| 541 | 66 | Feminino  | 498.3333 | 11 | insuf. ativo | 27.58732 | 710.845  | 920.3782 | 1010.75  | 1122.625 |
| 542 | 79 | Masculino | 963      | 8  | ativo        | 20.0692  | 2546.505 | 2432.699 | 1910.87  | 1817.086 |
| 543 | 67 | Feminino  | 963      | 8  | ativo        | 19.10009 | 987.725  | 1176.795 | 934.5    | 1051.246 |
| 544 | 67 | Masculino | 521.6667 | 11 | sedentário   | 28.3737  | 1344.665 | 1480.516 | 1016.51  | 1141.455 |
| 545 | 70 | Feminino  | 521.6667 | 11 | insuf. ativo | 24.00549 | 815.685  | 1017.088 | 540.165  | 720.5574 |
| 546 | 35 | Masculino |          | 6  | sedentário   | 28.01022 | 4517.29  | 3789.507 | 2958.45  | 2510.722 |
| 547 | 30 | Feminino  |          | 6  | sedentário   | 21.63115 | 1723.9   | 1786.737 | 1335.67  | 1346.881 |
| 548 | 73 | Masculino | 1150     | 11 | insuf. ativo | 27.77778 | 1190.99  | 1366.61  | 1250.675 | 1309.8   |
| 549 | 55 | Masculino | 2440     | 13 | insuf. ativo | 27.68166 | 1726.405 | 1810.87  | 1438.45  | 1468.868 |
| 550 | 24 | Masculino | 2440     | 13 | sedentário   | 26.72993 | 1373.99  | 1524.439 | 906.62   | 1051.277 |
| 551 | 51 | Feminino  | 2440     | 13 | ativo        | 28.51563 | 683.915  | 903.4127 | 601.495  | 778.2223 |
| 552 | 85 | Masculino | 937.5    | 4  | sedentário   | 29.01745 | 2379.425 | 2298.973 | 2528.04  | 2233.909 |
| 553 | 63 | Masculino | 4500     | 11 | sedentário   | 26.09328 | 1950.05  | 1988.506 | 1638.27  | 1622.107 |
| 554 | 54 | Feminino  | 1086.667 | 11 | ativo        | 34.72223 | 1844.8   | 1882.503 | 1874.22  | 1787.938 |
| 555 | 80 | Masculino |          | 10 | ativo        | 26.42357 | 1802.52  | 1872.799 | 1759.16  | 1709.542 |
| 556 | 79 | Feminino  |          | 10 | ativo        | 20.9042  | 1723.61  | 1810.089 | 1478.63  | 1504.126 |
| 557 | 57 | Masculino | 675      | 9  | insuf. ativo | 44.59877 | 909.76   | 1120.324 | 984.23   | 1116.109 |
| 558 | 79 | Masculino | 1137.333 | 2  | sedentário   | 32.28306 | 2089.815 | 2079.555 | 2113.645 | 1937.48  |
| 559 | 80 | Feminino  | 1137.333 | 2  | sedentário   | 26.44628 | 1617.36  | 1677.803 | 1644.02  | 1602.59  |
| 560 | 72 | Feminino  | 820      | 13 | muito ativo  | 26.15933 | 1760.38  | 1821.199 | 1487.39  | 1384.636 |
| 561 | 57 | Feminino  |          | 7  | ativo        | 29.38468 | 2226.795 | 2192.667 | 1343.61  | 1388.369 |
| 562 | 21 | Masculino | 400      | 11 | ativo        | 22.20599 | 1275.88  | 1441.686 | 854.79   | 1007.239 |
| 563 | 20 | Feminino  | 400      | 11 | muito ativo  | 18.67093 | 1257.915 | 1388.992 | 941.35   | 1046.962 |
| 564 | 35 | Masculino | 2000     | 11 | insuf. ativo | 24.22145 | 2348.925 | 2276.489 | 1519.12  | 1531.454 |
| 565 | 59 | Masculino | 1666.667 | 4  | sedentário   | 21.45329 | 833.14   | 1050.091 | 866.34   | 1017.107 |
| 566 | 62 | Masculino | 2550     | 11 | sedentário   | 31.09789 | 1350.54  | 1484.673 | 1184.385 | 1257.488 |
| 567 | 31 | Feminino  | 200      | 4  | ativo        | 20       | 1120.03  | 1307.497 | 1057.77  | 1176.409 |
| 568 | 62 | Masculino | 790      | 11 | insuf. ativo | 24.34176 | 1875.39  | 1926.827 | 1604.935 | 1551.118 |
| 569 | 59 | Feminino  | 790      | 11 | ativo        | 34.04903 | 1921.89  | 1928.702 | 1968.53  | 1857.17  |
| 570 | 28 | Feminino  | 790      | 11 | muito ativo  | 22.03172 | 2070.245 | 2074.336 | 1437.565 | 1473.231 |
| 571 | 86 | Feminino  | 200      | 4  | sedentário   | 29.13632 | 1294.09  | 1456.42  | 1229.395 | 1303.79  |
| 572 | 63 | Masculino | 475      | 0  | insuf. ativo | 28.40551 | 658.155  | 872.2985 | 786.545  | 937.126  |
| 573 | 43 | Masculino | 375      | 11 | ativo        | 31.14187 | 1592.7   | 1704.088 | 1146.05  | 1245.298 |

|     |    |           |          |     |              |          |          |          |          |          |
|-----|----|-----------|----------|-----|--------------|----------|----------|----------|----------|----------|
| 574 | 36 | Feminino  | 375      | 11  | muito ativo  | 20.54569 | 1577.5   | 1692.342 | 623.87   | 802.5097 |
| 575 | 64 | Feminino  | 228.75   | 4   | insuf. ativo | 15.58172 | 1011.42  | 1194.332 | 1025.185 | 1148.398 |
| 576 | 67 | Feminino  | 235.8333 | 8   | ativo        | 26.83518 | 1266.045 | 1410.066 | 1270.235 | 1345.088 |
| 577 | 70 | Feminino  | 475      | 11  | muito ativo  | 24.21875 | 1004.45  | 1205.562 | 672.99   | 847.3664 |
| 578 | 49 | Feminino  | 500      | 8   | muito ativo  | 29.35752 | 1430.14  | 1560.916 | 1175.075 | 1270.512 |
| 579 | 66 | Feminino  | 277.5    | 1   | insuf. ativo | 25.39063 | 1435.625 | 1565.752 | 1168.71  | 1249.395 |
| 580 | 71 | Feminino  | 415      | 4   | insuf. ativo | 31.25    | 1431.04  | 1567.863 | 1143.155 | 1238.088 |
| 581 | 34 | Feminino  | 630      | 10  | muito ativo  | 17.52781 | 1584.32  | 1695.953 | 1786.825 | 1716.698 |
| 582 | 41 | Masculino | 6000     | 12  | ativo        | 27.43484 | 2943.26  | 2522.191 | 3020.135 | 2393.657 |
| 583 | 84 | Feminino  | 866      | 11  | insuf. ativo | 23.33547 | 1503.19  | 1628.758 | 1246.3   | 1316.967 |
| 584 | 69 | Feminino  | 1200     | 4   | insuf. ativo | 29.77778 | 1038.87  | 1236.15  | 1105.56  | 1215.049 |
| 585 | 61 | Feminino  | 2350     | 13  | insuf. ativo | 36.73095 | 1182.98  | 1361.952 | 1485.275 | 1502.787 |
| 586 | 74 | Feminino  | 775      | 11  | ativo        | 26.7094  | 1191.47  | 1292.197 | 1415.055 | 1417.451 |
| 587 | 47 | Masculino | 1251.6   | 11  | ativo        | 30.64453 | 2343.05  | 2288.055 | 2032.59  | 1901.969 |
| 588 | 48 | Feminino  | 1251.6   | 11  | ativo        | 20.96436 | 983.6    | 1186.933 | 551.76   | 735.1475 |
| 589 | 25 | Feminino  | 1251.6   | 11  | ativo        | 19.53125 | 2508.5   | 2410.829 | 2454.39  | 2186.515 |
| 590 | 24 | Feminino  | 1251.6   | 11  | muito ativo  | 19.47341 | 1968.98  | 2003.215 | 1700.45  | 1667.274 |
| 591 | 69 | Masculino | 1000     | 11  | muito ativo  | 25.71166 | 1342.94  | 1387.011 | 960.745  | 1030.098 |
| 592 | 64 | Feminino  | 1000     | 11  | insuf. ativo | 29.29688 | 870.1851 | 1044.538 | 948.025  | 1054.064 |
| 593 | 33 | Masculino | 866.6667 | 11  | ativo        | 21.46194 | 1904.08  | 1952.169 | 1678.64  | 1622.758 |
| 594 | 42 | Feminino  |          | 11  | insuf. ativo | 20.61313 | 1232.205 | 1359.58  | 995.915  | 1098.876 |
| 595 | 47 | Masculino | 1666.667 | 11  | sedentário   | 28.57796 | 1338.705 | 1494.287 | 1126.6   | 1231.637 |
| 596 | 49 | Feminino  | 1666.667 | 11  | muito ativo  | 23.33547 | 2666.59  | 2526.498 | 2306.46  | 2088.249 |
| 597 | 80 | Feminino  | 2200     | 4   | sedentário   | 23.42209 | 1805.63  | 1875.258 | 1148.21  | 1249.19  |
| 598 | 83 | Masculino | 448.5714 | 0.5 | sedentário   | 23.79536 | 1504.81  | 1632.918 | 1355.7   | 1411.108 |
| 599 | 78 | Feminino  | 448.5714 | 0.5 | insuf. ativo | 24.4646  | 1651.91  | 1752.581 | 1489.44  | 1512.212 |
| 600 | 69 | Feminino  | 823.5    | 1   | muito ativo  | 25.23634 | 1873.93  | 1929.047 | 1709.64  | 1673.914 |
| 601 | 45 | Feminino  | 726.6667 | 11  | ativo        | 20.56881 | 1186.645 | 1361.329 | 1427.515 | 1462.974 |
| 602 | 20 | Masculino | 726.6667 | 11  | sedentário   | 20.04745 | 2269.18  | 2232.635 | 1530.12  | 1542.511 |
| 603 | 25 | Feminino  | 726.6667 | 11  | sedentário   | 37.34187 | 1482.53  | 1614.586 | 1058.64  | 1177.116 |
| 604 | 62 | Masculino | 666.25   | 4   | ativo        | 24.22145 | 2338.84  | 2284.907 | 1485.86  | 1509.536 |
| 605 | 83 | Masculino | 666.25   | 4   | sedentário   | 20.20202 | 1094.73  | 1285.37  | 646.95   | 823.6846 |
| 606 | 47 | Masculino | 575      | 11  | ativo        | 34.74891 | 1664.22  | 1760.964 | 1043.78  | 1165.007 |
| 607 | 39 | Feminino  | 575      | 11  | sedentário   | 27.04164 | 1968.71  | 1999.604 | 1645.78  | 1620.12  |
| 608 | 58 | Feminino  | 300      | 11  | insuf. ativo | 24.80159 | 998.13   | 1182.58  | 720.385  | 885.9934 |
| 609 | 25 | Masculino | 300      | 11  | sedentário   | 22.69402 | 1026.85  | 1225.492 | 530.7    | 715.1039 |
| 610 | 23 | Feminino  | 900      | 11  | muito ativo  | 19.37716 | 1102.09  | 1291.818 | 854.27   | 1006.794 |
| 611 | 31 | Feminino  | 900      | 11  | ativo        | 20.98399 | 1178.86  | 1358.568 | 902.75   | 1048.01  |
| 612 | 22 | Feminino  |          | 12  | ativo        | 25.96953 | 951.3    | 1157.92  | 710.93   | 881.4931 |
| 613 | 66 | Masculino | 790      | 11  | insuf. ativo | 22.23099 | 2167.62  | 2142.92  | 1896.38  | 1784.916 |
| 614 | 64 | Feminino  | 203      | 4   | ativo        | 25.28257 | 1297.91  | 1460.378 | 719.51   | 889.1511 |

|     |    |           |          |     |              |          |          |          |          |          |
|-----|----|-----------|----------|-----|--------------|----------|----------|----------|----------|----------|
| 615 | 51 | Feminino  | 1000     | 12  | muito ativo  | 24.14152 | 1840.965 | 1830.977 | 1585.11  | 1543.714 |
| 616 | 26 | Masculino | 1000     | 12  | muito ativo  | 18.937   | 3298.99  | 2895.093 | 3784.88  | 2838.357 |
| 617 | 46 | Masculino | 790      | 10  | ativo        | 33.13976 | 2720.57  | 2565.646 | 2371.16  | 2131.418 |
| 618 | 48 | Feminino  | 790      | 10  | muito ativo  | 23.30668 | 1098.88  | 1289.007 | 1091.57  | 1203.78  |
| 619 | 66 | Masculino | 2000     | 11  | muito ativo  | 27.33564 | 2221.6   | 2181.389 | 2002.735 | 1872.74  |
| 620 | 67 | Feminino  | 1033.333 | 13  | sedentário   | 33.26707 | 1146.735 | 1314.599 | 1356.58  | 1399.462 |
| 621 | 46 | Masculino | 2400     | 13  | ativo        | 28.39506 | 2789.48  | 2607.128 | 1766.635 | 1712.608 |
| 622 | 46 | Feminino  | 2400     | 13  | insuf. ativo | 31.64432 | 1331.8   | 1485.86  | 1078.98  | 1193.488 |
| 623 | 20 | Feminino  | 2400     | 13  | insuf. ativo | 28.73469 | 1373.42  | 1509.455 | 1226.43  | 1304.963 |
| 624 | 42 | Feminino  | 1200     | 11  | muito ativo  | 21.09619 | 1139.84  | 1324.753 | 1317.91  | 1382.1   |
| 625 | 41 | Masculino | 825      | 4   | sedentário   | 33.20313 | 856.74   | 1071.851 | 945.52   | 1083.932 |
| 626 | 38 | Feminino  | 825      | 4   | sedentário   | 19.37716 | 1203.53  | 1370.193 | 890.475  | 1035.324 |
| 627 | 69 | Masculino | 1080.667 | 4   | muito ativo  | 32.17993 | 1645.45  | 1747.374 | 1555.7   | 1561.46  |
| 628 | 63 | Feminino  | 1080.667 | 4   | sedentário   | 26.29758 | 1602.25  | 1712.443 | 1579.99  | 1579.382 |
| 629 | 44 | Masculino |          | 8   | muito ativo  | 24.09297 | 1779.055 | 1853.016 | 1118.45  | 1223.905 |
| 630 | 38 | Feminino  |          | 8   | ativo        | 28.04038 | 2071.75  | 2079.682 | 1826.42  | 1741.49  |
| 631 | 68 | Masculino | 1175     | 2   | insuf. ativo | 24.22145 | 1800.555 | 1865.686 | 1754.955 | 1681.186 |
| 632 | 63 | Feminino  | 1175     | 2   | sedentário   | 25.53671 | 1616.635 | 1709.599 | 1783.775 | 1703.3   |
| 633 | 35 | Masculino | 666.6667 | 13  | ativo        | 25.7122  | 1010.95  | 1211.354 | 1239.96  | 1321.606 |
| 634 | 23 | Masculino | 350      |     | insuf. ativo | 23.88844 | 2316.05  | 2267.844 | 1579.32  | 1578.889 |
| 635 | 61 | Masculino | 1150     | 4   | sedentário   | 27.54821 | 1586.24  | 1699.448 | 1319.32  | 1383.186 |
| 636 | 35 | Feminino  | 1500     | 13  | sedentário   | 21.45329 | 1490.32  | 1621.002 | 1149.32  | 1250.074 |
| 637 | 24 | Feminino  | 750      | 11  | insuf. ativo | 20.17325 | 1731.245 | 1816.01  | 1300.105 | 1366.127 |
| 638 | 65 | Masculino | 1505     | 13  | sedentário   | 34.06361 | 2091.635 | 2096.649 | 1378.765 | 1427.347 |
| 639 | 64 | Feminino  | 1505     | 13  | sedentário   | 26.67276 | 1795.165 | 1864.311 | 1182.005 | 1274.527 |
| 640 | 61 | Feminino  | 936.25   | 8   | ativo        | 31.11111 | 892.66   | 1104.751 | 933.5    | 1073.877 |
| 641 | 70 | Masculino | 378.75   | 4   | ativo        | 27.54821 | 1498.24  | 1541.773 | 1235.46  | 1299.11  |
| 642 | 65 | Feminino  | 378.75   | 4   | sedentário   | 40.23438 | 1300.93  | 1419.633 | 1180.41  | 1274.761 |
| 643 | 37 | Feminino  | 925      | 13  | muito ativo  | 23.06805 | 2831.385 | 2625.135 | 2630.215 | 2301.337 |
| 644 | 60 | Masculino | 550      | 1   | muito ativo  | 20.2449  | 1518.97  | 1644.54  | 1104.68  | 1214.341 |
| 645 | 65 | Feminino  | 1317     | 0.5 | insuf. ativo | 24.03461 | 911.305  | 1121.721 | 895.27   | 1036.924 |
| 646 | 28 | Masculino | 720      | 10  | sedentário   | 27.68166 | 2213.09  | 2187.749 | 1806.68  | 1739.467 |
| 647 | 28 | Feminino  | 720      | 10  | muito ativo  | 32.8473  | 1854.135 | 1913.448 | 1452.26  | 1480.625 |
| 648 | 31 | Masculino | 240      | 9   | muito ativo  | 22.0384  | 3785.855 | 3303.898 | 2316.52  | 2086.885 |
| 649 | 35 | Feminino  | 240      | 9   | insuf. ativo | 20.81166 | 2049.965 | 2065.777 | 1545.295 | 1551.089 |
| 650 | 65 | Masculino | 387.5    | 5   | ativo        | 32       | 1576.6   | 1691.61  | 1368.93  | 1421.216 |
| 651 | 60 | Feminino  | 387.5    | 5   | ativo        | 27.07205 | 1256.87  | 1425.504 | 1156.52  | 1255.806 |
| 652 | 21 | Feminino  | 387.5    | 5   | ativo        | 19.60519 | 1373.46  | 1523.995 | 644.64   | 821.5732 |
| 653 | 21 | Masculino | 380.5    | 11  | insuf. ativo | 22.83951 | 1514.42  | 1640.808 | 1068.64  | 1185.235 |
| 654 | 60 | Feminino  | 600      | 5   | ativo        | 25.625   | 1458.74  | 1594.948 | 975.78   | 1109.111 |
| 655 | 83 | Masculino | 348.75   | 0   | sedentário   | 21.09375 | 483.005  | 707.8363 | 378.895  | 559.3731 |



|     |    |           |          |     |              |          |          |          |          |          |
|-----|----|-----------|----------|-----|--------------|----------|----------|----------|----------|----------|
| 656 | 40 | Masculino | 620      | 10  | muito ativo  | 28.04967 | 1841.905 | 1900.974 | 1745.07  | 1662.999 |
| 657 | 37 | Feminino  | 620      | 10  | ativo        | 24       | 1667.27  | 1761.644 | 1931.625 | 1777.353 |
| 658 | 76 | Feminino  | 415      | 1   | muito ativo  | 26.5625  | 943.57   | 1039.073 | 761.155  | 906.8516 |
| 659 | 68 | Feminino  | 1600     | 4   | sedentário   | 27.73909 | 1255.485 | 1423.049 | 1168.445 | 1246.202 |
| 660 | 92 | Masculino | 557.5    | 4   | sedentário   | 21.875   | 1962.47  | 1998.16  | 1628.86  | 1615.234 |
| 661 | 81 | Feminino  | 557.5    | 4   | insuf. ativo | 22.89282 | 1901.83  | 1950.899 | 1006.23  | 1134.259 |
| 662 | 36 | Feminino  | 738.3333 | 5   | insuf. ativo | 23.66144 | 1272.91  | 1439.161 | 1291.16  | 1361.443 |
| 663 | 83 | Feminino  | 440      | 0.5 | ativo        | 26.84067 | 1793.75  | 1760.736 | 1656.9   | 1438.126 |
| 664 | 64 | Feminino  | 380      | 4   | insuf. ativo | 27.05515 | 991.61   | 1145.92  | 1524.325 | 1528.956 |
| 665 | 69 | Masculino | 342      | 4   | muito ativo  | 31.1993  | 1218.29  | 1392.509 | 1180.05  | 1274.476 |
| 666 | 68 | Feminino  | 342      | 4   | muito ativo  | 28.87544 | 964.32   | 1169.638 | 919.05   | 1061.747 |
| 667 | 76 | Masculino | 900      | 11  | sedentário   | 23.5102  | 1961.43  | 1997.352 | 2481.34  | 2204.253 |
| 668 | 47 | Masculino | 302.1429 | 7   | ativo        | 27.88519 | 1248.06  | 1403.584 | 1482.235 | 1504.053 |
| 669 | 46 | Feminino  | 302.1429 | 7   | insuf. ativo | 24.21875 | 638.6    | 865.6987 | 542.08   | 724.7711 |
| 670 | 21 | Feminino  | 302.1429 | 7   | ativo        | 21.22789 | 1369.91  | 1521.022 | 1168.01  | 1264.934 |
| 671 | 68 | Masculino | 266.6667 | 8   | sedentário   | 29.13632 | 1856.46  | 1915.329 | 2327.24  | 2102.147 |
| 672 | 21 | Feminino  | 1040.8   | 12  | sedentário   | 18.71095 | 1763.87  | 1842.158 | 1330.03  | 1391.426 |
| 673 | 55 | Feminino  | 300      | 1   | ativo        | 41.55125 | 921.17   | 1130.683 | 513.5    | 698.6008 |
| 674 | 50 | Masculino | 120      | 2   | ativo        | 26.53376 | 679.36   | 905.2673 | 519.71   | 704.5733 |
| 675 | 41 | Feminino  | 120      | 2   | sedentário   | 27.43484 | 822.24   | 1040.002 | 1056.44  | 1175.328 |
| 676 | 55 | Masculino | 1000     | 4   | ativo        | 27.88519 | 1191.915 | 1122.306 | 1508.105 | 1275.504 |
| 677 | 65 | Feminino  | 1700     | 4   | insuf. ativo | 26.22269 | 1468.32  | 1591.553 | 1318.635 | 1380.95  |
| 678 | 82 | Masculino | 450      | 12  | sedentário   | 20.95727 | 1295.66  | 1458.472 | 1288.52  | 1359.398 |
| 679 | 64 | Feminino  | 1265     | 4   | ativo        | 25.28257 | 1149.59  | 1333.224 | 1905.7   | 1813.536 |
| 680 | 51 | Masculino |          | 13  | ativo        | 42.44898 | 1518.565 | 1597.416 | 1555.765 | 1420.17  |
| 681 | 46 | Feminino  | 291.6667 | 5   | ativo        | 23.30906 | 1027.765 | 1223.8   | 818.615  | 970.3436 |
| 682 | 46 | Masculino | 291.6667 | 5   | ativo        | 27.54821 | 1782.295 | 1819.453 | 1133.925 | 1214.202 |
| 683 | 75 | Feminino  | 978.5714 | 10  | sedentário   | 18.02596 | 1233.375 | 1404.212 | 1196.05  | 1283.197 |
| 684 | 53 | Masculino | 412.5    | 12  | sedentário   | 26.54321 | 2756.73  | 2591.775 | 1965.34  | 1855.28  |
| 685 | 21 | Masculino | 412.5    | 12  | muito ativo  | 18.7883  | 3710.52  | 3256.764 | 1938.89  | 1836.807 |
| 686 | 47 | Feminino  | 412.5    | 12  | ativo        | 19.59184 | 1999.08  | 2026.541 | 1321.09  | 1384.549 |
| 687 | 60 | Feminino  | 305      | 11  | sedentário   | 23.33768 | 934.03   | 1134.398 | 1468.255 | 1426.087 |
| 688 | 61 | Feminino  | 1370     | 7   | ativo        | 30.66667 | 1696.99  | 1788.748 | 1739.54  | 1693.152 |
| 689 | 71 | Masculino | 2266.667 | 11  | sedentário   | 37.02422 | 2064.63  | 2077.081 | 2050.9   | 1914.612 |
| 690 | 76 | Feminino  | 625      | 12  | ativo        | 24.60973 | 1117.62  | 1268.636 | 959.73   | 1000.679 |
| 691 | 60 | Feminino  | 625      | 12  | ativo        | 29.04866 | 1179.545 | 1311.624 | 1016.425 | 1124.348 |
| 692 | 62 | Feminino  | 800      | 4   | sedentário   | 29.40228 | 789.27   | 1009.329 | 917.28   | 1060.258 |
| 693 | 78 | Feminino  | 915      | 4   | sedentário   | 28.80441 | 1090.16  | 1281.362 | 1473.5   | 1500.283 |
| 694 | 80 | Masculino | 615      | 0.5 | sedentário   | 24.22145 | 1911.035 | 1932.661 | 1925.06  | 1824.883 |
| 695 | 80 | Feminino  | 615      | 0.5 | insuf. ativo | 31.91111 | 2671.495 | 2414.027 | 2567.98  | 2259.745 |
| 696 | 62 | Masculino | 1250     | 8   | ativo        | 26.26494 | 2832.57  | 2646.333 | 2380.96  | 2137.931 |

|     |    |           |          |     |              |          |          |          |          |          |
|-----|----|-----------|----------|-----|--------------|----------|----------|----------|----------|----------|
| 697 | 72 | Feminino  | 650      | 5   | sedentário   | 18.25632 | 1400.25  | 1546.38  | 1277.78  | 1351.07  |
| 698 | 84 | Masculino | 700      | 1   | ativo        | 21.48438 | 2177.16  | 2119.694 | 2042.995 | 1890.451 |
| 699 | 76 | Feminino  |          | 3   | ativo        | 30.8642  | 1627.79  | 1692.748 | 1987.15  | 1713.13  |
| 700 | 78 | Feminino  | 415      | 0.5 | insuf. ativo | 25.78125 | 1289.045 | 1418.007 | 1152.79  | 1233.546 |
| 701 | 91 | Feminino  | 174.1429 | 4   | sedentário   | 24.22145 | 986.01   | 1189.09  | 861.47   | 1012.95  |
| 702 | 42 | Feminino  | 372.5    | 11  | insuf. ativo | 23.4375  | 906.14   | 1117.032 | 810.92   | 969.4651 |
| 703 | 38 | Feminino  | 325      | 3   | muito ativo  | 22.26563 | 2469.33  | 2381.926 | 1413.72  | 1455.26  |
| 704 | 67 | Masculino | 1050     | 4   | ativo        | 28.65014 | 716.77   | 940.6956 | 940.305  | 1063.938 |
| 705 | 63 | Feminino  | 1050     | 4   | ativo        | 32.38836 | 954.225  | 1137.366 | 1359.425 | 1363.782 |
| 706 | 60 | Masculino | 800      | 4   | ativo        | 35.37981 | 1442.75  | 1581.711 | 950.84   | 1088.373 |
| 707 | 49 | Masculino | 600      | 2   | sedentário   | 33.05785 | 1757.355 | 1804.759 | 1687.75  | 1651.626 |
| 708 | 34 | Feminino  | 250      | 11  | ativo        | 28.82753 | 1454.41  | 1591.366 | 1052.66  | 1172.253 |
| 709 | 70 | Feminino  | 150      | 2   | muito ativo  | 23.53036 | 1501.07  | 1629.845 | 1288.11  | 1359.08  |
| 710 | 49 | Feminino  | 120      | 5   | ativo        | 25.25951 | 1455.33  | 1592.127 | 1012.67  | 1139.554 |
| 711 | 84 | Feminino  | 235.8333 | 5   | sedentário   | 18.42653 | 1889.45  | 1941.212 | 1722.82  | 1683.421 |
| 712 | 20 | Feminino  | 241.6667 | 1   | sedentário   | 20.93664 | 1925.55  | 1955.422 | 955.115  | 1091.739 |
| 713 | 60 | Feminino  | 100      | 0   | sedentário   | 24.97399 | 2433.56  | 2355.445 | 2356.9   | 2121.93  |
| 714 | 66 | Feminino  | 1750     | 4   | ativo        | 22.20633 | 1151.66  | 1334.901 | 987.05   | 1117.733 |
| 715 | 52 | Feminino  |          | 4   | sedentário   | 27.88762 | 685.945  | 899.8911 | 805.27   | 959.6179 |
| 716 | 61 | Feminino  | 83       | 3   | insuf. ativo | 28.93518 | 1219.28  | 1365.938 | 1108.19  | 1212.118 |
| 717 | 26 | Masculino | 645      | 0   | ativo        | 22.53061 | 1517.47  | 1634.885 | 1084.805 | 1192.162 |
| 718 | 73 | Masculino | 1365     | 12  | sedentário   | 25.71166 | 1912.78  | 1956.24  | 1336.035 | 1395.99  |
| 719 | 33 | Feminino  | 42.85714 | 1   | sedentário   | 31.55556 | 950.22   | 1156.947 | 1106.54  | 1215.837 |
| 720 | 78 | Feminino  | 415      | 0   | insuf. ativo | 25.39063 | 457.5    | 673.6194 | 436.925  | 623.2593 |
| 721 | 60 | Masculino | 750      | 9   | insuf. ativo | 25.78125 | 1824.39  | 1890.075 | 1506.14  | 1524.675 |
| 722 | 55 | Feminino  | 60       | 5   | ativo        | 22.20633 | 953.315  | 1159.69  | 1006.56  | 1133.486 |
| 723 | 35 | Feminino  | 333.3333 | 8   | ativo        | 22.83288 | 2867.12  | 2671.081 | 2272.24  | 2065.292 |
| 724 | 72 | Masculino | 330.625  | 4   | sedentário   | 22.14533 | 2666.59  | 2479.395 | 1542.425 | 1547.854 |
| 725 | 48 | Masculino | 300      | 11  | ativo        | 23.597   | 2924.01  | 2711.688 | 1883.04  | 1797.591 |
| 726 | 80 | Feminino  | 415      | 4   | ativo        | 31.95763 | 1321.24  | 1480.102 | 1223.81  | 1308.957 |
| 727 | 33 | Masculino | 525      | 5   | sedentário   | 22.85714 | 1448.1   | 1586.143 | 1057.93  | 1176.539 |
| 728 | 50 | Feminino  | 700      | 3   | ativo        | 25.77778 | 1405.23  | 1550.531 | 1237.5   | 1319.682 |
| 729 | 89 | Feminino  | 439.3333 | 5   | sedentário   | 29.66655 | 1190.295 | 1358.588 | 1458.11  | 1487.223 |
| 730 | 71 | Feminino  | 665      | 2   | insuf. ativo | 24.03461 | 872.53   | 1086.345 | 924.08   | 1065.975 |
| 731 | 57 | Masculino | 250      | 3   | sedentário   | 24.97704 | 1031.73  | 1229.207 | 1209.345 | 1274.59  |
| 732 | 49 | Masculino | 250      | 3   | ativo        | 22.65625 | 1376.515 | 1525.759 | 1277.305 | 1340.887 |
| 733 | 59 | Feminino  | 250      | 3   | ativo        | 26.22269 | 935.73   | 1143.866 | 904.12   | 1049.167 |
| 734 | 72 | Feminino  | 315      | 3   | sedentário   | 25.77778 | 1275.48  | 1416.155 | 1370.765 | 1408.713 |
| 735 | 47 | Masculino | 284      | 4   | ativo        | 22.03857 | 2292.88  | 2250.458 | 1543.66  | 1552.551 |
| 736 | 38 | Feminino  | 284      | 4   | insuf. ativo | 37.5     | 1652.97  | 1753.435 | 1574.07  | 1575.021 |
| 737 | 36 | Feminino  | 200      | 3   | ativo        | 28.57796 | 780.475  | 995.4502 | 528.31   | 698.5198 |

|     |    |           |          |    |              |          |          |          |          |          |
|-----|----|-----------|----------|----|--------------|----------|----------|----------|----------|----------|
| 738 | 64 | Feminino  | 350      | 11 | muito ativo  | 27.99302 | 1328.9   | 1486.31  | 1067.71  | 1180.802 |
| 739 | 64 | Feminino  | 84.54546 | 0  | muito ativo  | 25.78125 | 1129     | 1315.149 | 872.39   | 1019.363 |
| 740 | 32 | Feminino  | 103.3333 | 7  | muito ativo  | 23.97531 | 831      | 1027.33  | 626.7    | 797.478  |
| 741 | 70 | Masculino |          | 9  | ativo        | 25.68956 | 1010.7   | 1211.131 | 1902.16  | 1811.049 |
| 742 | 67 | Feminino  |          | 9  | ativo        | 32.04615 | 1318.91  | 1478.136 | 2195.09  | 2013.212 |
| 743 | 62 | Feminino  | 205      | 4  | insuf. ativo | 24.09297 | 1575.975 | 1624.654 | 1930.72  | 1817.351 |
| 744 | 45 | Feminino  |          | 11 | insuf. ativo | 24.21875 | 759.395  | 970.3569 | 1043.805 | 1152.806 |
| 745 | 71 | Feminino  | 207.5    | 4  | ativo        | 29.67494 | 1123.98  | 1310.943 | 912.09   | 1055.889 |
| 746 | 62 | Masculino | 250.5    | 11 | ativo        | 32.98792 | 1756.46  | 1835.87  | 2032.75  | 1892.391 |
| 747 | 33 | Feminino  |          | 13 | insuf. ativo | 26.03749 | 1668.82  | 1766.19  | 1751.16  | 1703.803 |
| 748 | 67 | Masculino | 567.5    | 4  | sedentário   | 23.32415 | 2594.575 | 2397.566 | 2147.025 | 1945.077 |
| 749 | 61 | Feminino  | 567.5    | 4  | insuf. ativo | 22.71897 | 2262.22  | 2220.569 | 1651.09  | 1622.564 |
| 750 | 55 | Masculino | 783.3333 | 4  | sedentário   | 21.22449 | 2167.58  | 2149.913 | 2007.425 | 1883.901 |
| 751 | 26 | Masculino | 783.3333 | 4  | muito ativo  | 31.97502 | 3536.01  | 3138.248 | 3553.39  | 2875.717 |
| 752 | 73 | Feminino  | 250      | 2  | insuf. ativo | 29.13632 | 872.14   | 1085.988 | 712.1    | 882.5386 |
| 753 | 39 | Feminino  |          | 8  | ativo        | 27.33564 | 1827.76  | 1820.338 | 1847     | 1746.042 |
| 754 | 77 | Masculino | 707.5    | 11 | sedentário   | 30.854   | 1706.02  | 1796.028 | 1084.08  | 1197.733 |
| 755 | 79 | Feminino  | 707.5    | 11 | insuf. ativo | 35.62902 | 1293.93  | 1424.493 | 1319.825 | 1379.905 |
| 756 | 31 | Masculino |          | 11 | sedentário   | 24.18705 | 3264.49  | 2951.209 | 2711.9   | 2354.068 |
| 757 | 33 | Feminino  |          | 11 | insuf. ativo | 19.83471 | 1530.855 | 1650.617 | 1007.275 | 1129.125 |
| 758 | 72 | Feminino  |          | 4  | sedentário   | 33.41241 | 1467.37  | 1602.079 | 935.18   | 1075.284 |
| 759 | 76 | Masculino | 957.5    | 4  | sedentário   | 26.82742 | 1348.28  | 1502.874 | 1345.21  | 1403.076 |
| 760 | 77 | Feminino  | 957.5    | 4  | sedentário   | 24.32501 | 1356.345 | 1495.891 | 1384.69  | 1433.12  |
| 761 | 64 | Masculino | 375      | 11 | ativo        | 23.12467 | 2299.82  | 2255.67  | 1740.67  | 1696.269 |
| 762 | 75 | Feminino  | 103.75   | 11 | sedentário   | 28.39872 | 1224.865 | 1336.135 | 1240.495 | 1209.308 |
| 763 | 59 | Feminino  | 103.75   | 1  | sedentário   | 22.86254 | 1689.99  | 1764.595 | 1355.075 | 1410.63  |
| 764 | 72 | Feminino  |          | 8  | ativo        | 30.44983 | 930.635  | 1135.698 | 923.82   | 1063.365 |
| 765 | 81 | Masculino | 92.22222 | 0  | sedentário   | 24.38272 | 1334.33  | 1491.138 | 1135.87  | 1239.344 |
| 766 | 85 | Feminino  | 92.22222 | 0  | insuf. ativo | 25.56611 | 838.01   | 1054.591 | 745.87   | 912.5459 |
| 767 | 37 | Masculino | 960      | 9  | ativo        | 27.99474 | 3205.62  | 2910.207 | 2394.11  | 2146.659 |
| 768 | 36 | Feminino  | 960      | 9  | ativo        | 27.1809  | 1031.83  | 1229.911 | 592.33   | 773.2783 |
| 769 | 20 | Feminino  | 960      | 9  | insuf. ativo | 24.65483 | 350.79   | 573.1486 | 432.96   | 619.5869 |
| 770 | 63 | Feminino  | 220      | 4  | sedentário   | 33.29865 | 879.95   | 1093.139 | 885.87   | 1033.721 |
| 771 | 78 | Masculino |          | 10 | sedentário   | 19.57992 | 1144.16  | 1221.94  | 1840.03  | 1605.23  |
| 772 | 75 | Feminino  |          | 10 | insuf. ativo | 35.13355 | 1276.635 | 1430.835 | 1231.435 | 1295.577 |
| 773 | 73 | Masculino | 285      | 8  | ativo        | 29.05329 | 960.58   | 1166.275 | 2128.1   | 1967.614 |
| 774 | 72 | Feminino  | 285      | 8  | insuf. ativo | 26.76978 | 684.17   | 909.8831 | 981.59   | 1113.924 |
| 775 | 56 | Masculino | 166.6667 | 8  | muito ativo  | 24.6181  | 3085.64  | 2826.12  | 2056.8   | 1918.681 |
| 776 | 30 | Masculino | 166.6667 | 8  | ativo        | 19.88385 | 3863.26  | 3359.475 | 4724.32  | 3551.534 |
| 777 | 61 | Feminino  | 207.5    | 1  | insuf. ativo | 26.44628 | 1464.645 | 1580.47  | 1223.895 | 1308.819 |
| 778 | 64 | Masculino | 207.5    | 1  | ativo        | 20.57143 | 970.98   | 1173.599 | 789.46   | 949.9108 |

|     |    |           |          |     |              |          |          |          |          |          |
|-----|----|-----------|----------|-----|--------------|----------|----------|----------|----------|----------|
| 779 | 89 | Masculino |          | 1   | sedentário   | 18.51852 | 1308.92  | 1469.695 | 1022.05  | 1147.251 |
| 780 | 53 | Feminino  | 300      | 11  | ativo        | 24.91349 | 1608.15  | 1716.719 | 1014.495 | 1141.036 |
| 781 | 52 | Feminino  | 850      | 4   | insuf. ativo | 27.34453 | 1443.79  | 1582.573 | 978.21   | 1111.125 |
| 782 | 62 | Masculino |          | 8   | sedentário   | 29.62963 | 2383.6   | 2318.316 | 1852.53  | 1776.044 |
| 783 | 47 | Masculino | 800      | 10  | muito ativo  | 21.45329 | 1799.75  | 1867.504 | 1341.645 | 1386.088 |
| 784 | 72 | Feminino  | 69.16666 | 4   | ativo        | 22.77319 | 1091.14  | 1282.222 | 1028.88  | 1152.845 |
| 785 | 78 | Masculino | 415      | 2   | ativo        | 21.22449 | 1453.96  | 1590.994 | 1565.44  | 1568.655 |
| 786 | 68 | Feminino  | 415      | 2   | ativo        | 25.33333 | 917.91   | 1127.726 | 1092.53  | 1204.555 |
| 787 | 39 | Feminino  | 570      | 11  | ativo        | 27.23922 | 2034.58  | 2053.956 | 1978.73  | 1864.608 |
| 788 | 71 | Feminino  | 276.6667 | 3   | ativo        | 27.23922 | 1716.745 | 1792.888 | 1358.585 | 1412.1   |
| 789 | 44 | Feminino  |          | 4   | sedentário   | 25.0995  | 997.36   | 1199.236 | 1111     | 1219.421 |
| 790 | 72 | Masculino |          | 4   | insuf. ativo | 25.40282 | 1978.935 | 2010.129 | 2453.26  | 2171.938 |
| 791 | 70 | Feminino  | 415      | 3   | insuf. ativo | 32.04995 | 632.18   | 795.5436 | 716.365  | 878.7465 |
| 792 | 80 | Feminino  | 103.75   | 6   | sedentário   | 20.82999 | 2463.385 | 2174.615 | 1740.34  | 1632.292 |
| 793 | 29 | Feminino  |          | 8   | insuf. ativo | 26.63892 | 1858.845 | 1843.237 | 1164.44  | 1254.588 |
| 794 | 68 | Masculino |          | 1   | sedentário   | 26.44898 | 1240.77  | 1411.76  | 1235.02  | 1317.742 |
| 795 | 64 | Feminino  | 83       | 11  | sedentário   | 21.77384 | 2351.245 | 2274.917 | 2102.93  | 1935.779 |
| 796 | 63 | Masculino | 207.5    | 11  | ativo        | 25.46939 | 1101.235 | 1265.588 | 898.73   | 1035.255 |
| 797 | 82 | Feminino  | 207.5    | 11  | insuf. ativo | 26.48554 | 1014.525 | 1196.361 | 1035.095 | 1139.065 |
| 798 | 78 | Feminino  | 650      | 3   | insuf. ativo | 31.25    | 2182.18  | 2035.173 | 1701.03  | 1444.346 |
| 799 | 45 | Masculino |          | 11  | muito ativo  | 18.93878 | 2219.45  | 2166.843 | 2191.745 | 1990.259 |
| 800 | 28 | Masculino | 485      | 4   | muito ativo  | 29.62963 | 1105.34  | 1294.662 | 1164.23  | 1261.933 |
| 801 | 70 | Feminino  | 415      | 0.5 | sedentário   | 22.06035 | 1511.575 | 1635.918 | 1276.435 | 1318.792 |
| 802 | 49 | Masculino | 324      | 3   | muito ativo  | 20.43817 | 1061.27  | 1246.682 | 1109.135 | 1217.364 |
| 803 | 44 | Feminino  | 324      | 3   | ativo        | 29.38476 | 1542.885 | 1655.885 | 1323.905 | 1381.628 |
| 804 | 23 | Feminino  | 324      | 3   | ativo        | 26.49151 | 1067.275 | 1257.813 | 642.325  | 811.5958 |
| 805 | 32 | Feminino  | 1000     | 11  | sedentário   | 20.70313 | 1351.24  | 1504.461 | 1133.3   | 1237.164 |
| 806 | 87 | Masculino | 415      | 4   | sedentário   | 20.44444 | 978.85   | 1182.678 | 931.88   | 1072.519 |
| 807 | 86 | Feminino  | 415      | 4   | sedentário   | 29.33333 | 699.65   | 924.6981 | 574.8    | 756.8777 |
| 808 | 63 | Masculino | 165      | 4   | ativo        | 29.35236 | 2023.115 | 2038.898 | 1663.315 | 1596.223 |
| 809 | 62 | Feminino  | 165      | 4   | insuf. ativo | 23.52941 | 1743.575 | 1820.967 | 1500.85  | 1459.022 |
| 810 | 55 | Feminino  | 3533.333 | 13  | sedentário   | 29.05329 | 1185.71  | 1336.374 | 1460.72  | 1428.431 |
| 811 | 24 | Feminino  | 3533.333 | 13  | sedentário   | 21.19274 | 1087.88  | 1279.362 | 798.04   | 958.2834 |
| 812 | 74 | Masculino | 415      | 4   | sedentário   | 19.03114 | 1178.96  | 1357.908 | 1005.78  | 1123.969 |
| 813 | 72 | Feminino  | 415      | 4   | insuf. ativo | 35.37981 | 1274.725 | 1427.008 | 1311.74  | 1363.368 |
| 814 | 23 | Masculino | 525      | 8   | sedentário   | 20.2449  | 2481.35  | 2374.925 | 1894.38  | 1800.174 |
| 815 | 36 | Feminino  | 600      | 8   | insuf. ativo | 25.25951 | 1692.565 | 1741.693 | 1542.105 | 1547.304 |
| 816 | 76 | Feminino  | 1900     | 11  | insuf. ativo | 36.19875 | 1133.35  | 1299.744 | 804.89   | 932.9737 |
| 817 | 75 | Masculino | 207.5    | 13  | ativo        | 25.20776 | 1704.34  | 1794.683 | 1670.86  | 1645.832 |
| 818 | 74 | Feminino  | 207.5    | 13  | sedentário   | 35.75595 | 826.42   | 1043.874 | 809.9    | 968.5811 |
| 819 | 49 | Masculino | 2125     | 13  | sedentário   | 29.03674 | 1956.695 | 1941.419 | 1946.06  | 1800.653 |

|     |    |           |          |    |              |          |          |          |          |          |
|-----|----|-----------|----------|----|--------------|----------|----------|----------|----------|----------|
| 820 | 47 | Feminino  | 2125     | 13 | ativo        | 26.986   | 1806.515 | 1867.215 | 1642.995 | 1619.101 |
| 821 | 20 | Feminino  | 2125     | 13 | ativo        | 25.23634 | 1701.125 | 1792.108 | 1362.705 | 1415.106 |
| 822 | 72 | Masculino | 300      | 4  | ativo        | 26.06168 | 1964.48  | 1999.612 | 1479.63  | 1497.375 |
| 823 | 70 | Feminino  | 300      | 4  | ativo        | 22.67995 | 1814.075 | 1878.284 | 1716.295 | 1675.963 |
| 824 | 67 | Feminino  | 975.3333 | 11 | ativo        | 27.05515 | 1484.76  | 1615.918 | 1359.05  | 1407.103 |
| 825 | 60 | Masculino | 975.3333 | 11 | ativo        | 28.34467 | 2191.875 | 2172.987 | 2745.13  | 2314.758 |
| 826 | 90 | Feminino  | 975.3333 | 11 | sedentário   | 22.31328 | 1360.615 | 1504.024 | 1277.35  | 1350.39  |
| 827 | 75 | Feminino  |          | 4  | sedentário   | 19.59646 | 1132.95  | 1318.758 | 1207.93  | 1296.48  |
| 828 | 68 | Feminino  | 425      | 4  | muito ativo  | 28.67263 | 2249.895 | 2207.302 | 1825.7   | 1670.691 |
| 829 | 52 | Masculino |          | 8  | ativo        | 31.14187 | 1553.44  | 1626.439 | 1402.115 | 1301.012 |
| 830 | 67 | Feminino  | 743      | 4  | ativo        | 29.77778 | 1385.045 | 1469.246 | 1381.28  | 1359.249 |
| 831 | 30 | Feminino  | 3000     | 13 | muito ativo  | 25.77778 | 1095.22  | 1285.8   | 1407     | 1450.169 |
| 832 | 70 | Feminino  | 2200     | 13 | muito ativo  | 23.23346 | 1137.41  | 1322.64  | 1101.53  | 1211.806 |
| 833 | 40 | Masculino | 686      | 11 | muito ativo  | 38.73967 | 1480.165 | 1608.191 | 1886.245 | 1793.318 |
| 834 | 65 | Feminino  | 207.5    | 4  | muito ativo  | 23.11111 | 1752.18  | 1830.636 | 1400.27  | 1432.081 |
| 835 | 69 | Masculino | 2625     | 11 | ativo        | 25.38426 | 1690.55  | 1759.73  | 1781.935 | 1659.253 |
| 836 | 74 | Feminino  | 1600     | 1  | ativo        | 31.18459 | 2217.7   | 2193.782 | 2083.42  | 1936.999 |
| 837 | 85 | Masculino | 1200     | 11 | muito ativo  | 25.63692 | 2189.135 | 2148.258 | 1743.66  | 1696.823 |
| 838 | 68 | Masculino | 530      | 4  | insuf. ativo | 27.9431  | 1459.7   | 1595.741 | 1222.41  | 1307.859 |
| 839 | 41 | Masculino | 400      | 5  | muito ativo  | 22.49135 | 3147.15  | 2869.318 | 2972.83  | 2519.754 |
| 840 | 20 | Masculino | 400      | 5  | insuf. ativo | 23.14815 | 3469.47  | 2947.16  | 2032.635 | 1846.126 |
| 841 | 44 | Feminino  | 400      | 5  | insuf. ativo | 23.73866 | 1110.965 | 1273.319 | 976.845  | 1037.521 |
| 842 | 66 | Feminino  | 1855     | 4  | insuf. ativo | 34.375   | 1155.345 | 1338.209 | 1228.12  | 1311.98  |
| 843 | 62 | Feminino  | 616.6667 | 4  | insuf. ativo | 27.34375 | 1517.83  | 1643.605 | 1185.59  | 1278.858 |
| 844 | 30 | Masculino | 1395     | 12 | muito ativo  | 21.87755 | 3989.49  | 3443.673 | 4371.98  | 3353.261 |
| 845 | 29 | Masculino | 1395     | 12 | muito ativo  | 20.04745 | 2880.03  | 2680.311 | 2518.45  | 2228.598 |
| 846 | 62 | Feminino  |          | 12 | ativo        | 33.30499 | 1331.24  | 1488.535 | 1689.03  | 1659.01  |
| 847 | 78 | Masculino | 489.895  | 11 | insuf. ativo | 27.99036 | 1413.645 | 1526.81  | 1743.81  | 1642.534 |
| 848 | 72 | Feminino  | 489.895  | 11 | ativo        | 26.03749 | 920.07   | 1129.412 | 1176.635 | 1227.712 |
| 849 | 58 | Feminino  | 741.25   | 8  | insuf. ativo | 29.47584 | 2729.83  | 2572.344 | 1909.52  | 1816.22  |
| 850 | 32 | Masculino | 741.25   | 8  | muito ativo  | 36.6782  | 3718.8   | 3262.356 | 2680.52  | 2333.874 |
| 851 | 32 | Feminino  | 741.25   | 8  | ativo        | 22.18935 | 1322.19  | 1480.904 | 1016.2   | 1142.453 |
| 852 | 69 | Masculino | 900      | 0  | ativo        | 28.125   | 1728.83  | 1814.255 | 1318.99  | 1382.932 |
| 853 | 33 | Masculino | 201.6    | 6  | insuf. ativo | 24.4418  | 816.45   | 1034.633 | 430.74   | 617.3653 |
| 854 | 29 | Feminino  | 201.6    | 6  | muito ativo  | 17.99816 | 724.05   | 845.1832 | 974.395  | 914.6487 |
| 855 | 72 | Feminino  | 415      | 4  | insuf. ativo | 27.58732 | 2305.71  | 2260.09  | 2281     | 2071.177 |
| 856 | 66 | Masculino | 207.5    | 4  | sedentário   | 27.34375 | 1605.735 | 1657.852 | 1730.785 | 1650.154 |
| 857 | 72 | Feminino  | 207.5    | 4  | sedentário   | 31.14187 | 758.86   | 973.2784 | 1155.74  | 1248.316 |
| 858 | 59 | Feminino  | 638.3333 | 4  | insuf. ativo | 26.5625  | 1281.845 | 1445.888 | 1226.945 | 1305.654 |
| 859 | 76 | Feminino  | 138.3333 | 5  | sedentário   | 24.88889 | 1270.5   | 1437.112 | 1014.31  | 1140.901 |
| 860 | 83 | Feminino  |          | 4  | sedentário   | 27.34375 | 872.785  | 1068.022 | 988.58   | 1103.029 |

|     |    |           |          |     |              |          |          |          |          |          |
|-----|----|-----------|----------|-----|--------------|----------|----------|----------|----------|----------|
| 861 | 75 | Masculino | 696      | 13  | ativo        | 24.22145 | 1518.73  | 1643.335 | 1854.965 | 1734.911 |
| 862 | 65 | Feminino  | 696      | 13  | ativo        | 27.68878 | 1067.865 | 1261.323 | 1703.835 | 1628.838 |
| 863 | 35 | Feminino  |          | 11  | ativo        | 23.1405  | 2127.96  | 2125.583 | 1420.36  | 1460.284 |
| 864 | 61 | Feminino  | 103.75   | 3   | sedentário   | 27.60945 | 1946.48  | 1985.729 | 1464.69  | 1493.677 |
| 865 | 75 | Masculino | 2415     | 0.5 | ativo        | 19.94321 | 1720.445 | 1793.499 | 1580.57  | 1537.895 |
| 866 | 22 | Masculino | 762      | 12  | insuf. ativo | 23.5102  | 2828.44  | 2643.37  | 1588.57  | 1585.697 |
| 867 | 28 | Feminino  | 762      | 12  | insuf. ativo | 21.48438 | 2582.83  | 2221.139 | 1170.565 | 1169.017 |
| 868 | 70 | Masculino | 303.75   | 3   | muito ativo  | 20.65754 | 1217.8   | 1392.089 | 751.79   | 917.7731 |
| 869 | 21 | Masculino | 303.75   | 3   | sedentário   | 24.56747 | 2452.92  | 2369.788 | 2700.64  | 2346.829 |
| 870 | 61 | Feminino  | 303.75   | 3   | sedentário   | 28.34467 | 1039.8   | 1236.974 | 1032.49  | 1155.798 |
| 871 | 61 | Masculino |          | 12  | muito ativo  | 25.68956 | 1549.31  | 1669.366 | 1689.9   | 1659.64  |
| 872 | 60 | Feminino  |          | 12  | muito ativo  | 27.91552 | 2042.12  | 2059.765 | 1881.89  | 1796.78  |
| 873 | 39 | Masculino | 675      | 12  | ativo        | 30.08383 | 1254.3   | 1423.313 | 941.72   | 1080.757 |
| 874 | 41 | Feminino  | 675      | 12  | insuf. ativo | 21.77384 | 1239.715 | 1410.847 | 1105.825 | 1184.734 |
| 875 | 72 | Feminino  | 783.3333 | 4   | ativo        | 33.05785 | 933.3    | 1134.314 | 553.515  | 705.2601 |
| 876 | 67 | Feminino  | 1122.5   | 4   | ativo        | 28.39872 | 3053.15  | 2803.226 | 2076.06  | 1931.94  |
| 877 | 78 | Feminino  | 207.5    | 4   | sedentário   | 35.59986 | 1550.93  | 1661.639 | 1517.205 | 1532.776 |
| 878 | 72 | Masculino | 560.6667 | 4   | ativo        | 25.21736 | 672.5    | 898.674  | 684.01   | 857.324  |
| 879 | 65 | Masculino | 560.6667 | 4   | sedentário   | 24.03461 | 489.94   | 718.2973 | 649.96   | 826.4332 |
| 880 | 62 | Feminino  | 160      |     | insuf. ativo | 30.0621  | 1015.345 | 1193.666 | 805.85   | 957.6816 |
| 881 | 36 | Masculino | 500      | 13  | ativo        | 22.30935 | 1726.065 | 1764.666 | 1824     | 1656.067 |
| 882 | 24 | Feminino  | 500      | 13  | insuf. ativo | 24.38653 | 2251.28  | 2219.148 | 1631.35  | 1617.054 |
| 883 | 85 | Masculino | 229      | 0.5 | ativo        | 24.21875 | 1444.42  | 1484.427 | 1325.685 | 1317.179 |
| 884 | 82 | Feminino  | 229      | 0.5 | insuf. ativo | 17.84652 | 1346.995 | 1498.635 | 1427.625 | 1464.407 |
| 885 | 56 | Feminino  | 216.6667 | 8   | insuf. ativo | 25.91068 | 1486.01  | 1586.242 | 1167.36  | 1264.418 |
| 886 | 45 | Masculino | 625      | 11  | ativo        | 24.60973 | 1895.49  | 1945.94  | 1482.86  | 1507.292 |
| 887 | 39 | Feminino  | 625      | 11  | muito ativo  | 27.34375 | 1805.6   | 1875.234 | 1118.4   | 1225.36  |
| 888 | 45 | Feminino  | 435.8333 | 11  | ativo        | 29.64268 | 3204.57  | 2909.474 | 1466.27  | 1494.863 |
| 889 | 49 | Feminino  | 288.3333 | 6   | insuf. ativo | 21.77778 | 1534.26  | 1657.064 | 1269.11  | 1344.335 |
| 890 | 37 | Masculino | 795.25   | 11  | muito ativo  | 29.06977 | 1050.84  | 1246.741 | 1148.5   | 1249.421 |
| 891 | 34 | Feminino  | 795.25   | 11  | ativo        | 26.25958 | 1192.86  | 1369.513 | 1011.575 | 1137.898 |
| 892 | 73 | Feminino  | 755      | 4   | ativo        | 18.75    | 1681.83  | 1776.641 | 1035.61  | 1158.349 |
| 893 | 35 | Feminino  | 755      | 4   | ativo        | 18.36547 | 1707.28  | 1797.036 | 1004.89  | 1133.156 |
| 894 | 56 | Masculino | 681.6667 | 4   | muito ativo  | 26.81222 | 1722.79  | 1629.845 | 1338.67  | 1271.781 |
| 895 | 54 | Feminino  | 681.6667 | 4   | sedentário   | 30.66667 | 1549.46  | 1641.746 | 1025.805 | 1143.018 |
| 896 | 61 | Masculino | 145      | 0   | ativo        | 23.11111 | 565.56   | 794.2304 | 424.53   | 611.1375 |
| 897 | 30 | Masculino | 433.3333 | 9   | muito ativo  | 29.38775 | 2178.41  | 2163.998 | 2048.15  | 1912.715 |
| 898 | 53 | Feminino  | 580      | 8   | insuf. ativo | 28.99931 | 1338.9   | 1471.222 | 1151.285 | 1231.737 |
| 899 | 24 | Feminino  | 580      | 8   | ativo        | 22.60027 | 1911.845 | 1934.138 | 1748.505 | 1695.677 |
| 900 | 83 | Feminino  | 615      | 5   | sedentário   | 38.26531 | 1133.74  | 1319.446 | 958.76   | 1094.973 |
| 901 | 69 | Masculino | 316.25   | 8   | ativo        | 25.65437 | 1361.48  | 1505.678 | 1139.49  | 1241.811 |

|     |    |           |          |     |              |          |          |          |          |          |
|-----|----|-----------|----------|-----|--------------|----------|----------|----------|----------|----------|
| 902 | 73 | Feminino  | 316.25   | 8   | insuf. ativo | 24.24242 | 1199.395 | 1340.651 | 933.44   | 1049.355 |
| 903 | 26 | Masculino | 832      | 8   | ativo        | 23.45092 | 1233.975 | 1401.004 | 979.425  | 1103.502 |
| 904 | 24 | Masculino | 832      | 8   | ativo        | 21.67126 | 1415.52  | 1559.099 | 942.58   | 1081.476 |
| 905 | 22 | Masculino | 832      | 8   | muito ativo  | 21.30682 | 1652.35  | 1752.936 | 1369.49  | 1421.644 |
| 906 | 22 | Masculino | 832      | 8   | ativo        | 24.60973 | 1624.635 | 1694.898 | 1822.79  | 1641.16  |
| 907 | 85 | Feminino  |          | 4   | sedentário   | 25.31545 | 1627.65  | 1733.005 | 1231.86  | 1315.267 |
| 908 | 41 | Feminino  | 725      | 8   | insuf. ativo | 25.91068 | 2602.395 | 2383.676 | 2418.53  | 2084.978 |
| 909 | 73 | Feminino  | 1229     | 10  | insuf. ativo | 18.92301 | 1251.33  | 1420.779 | 950.48   | 1088.073 |
| 910 | 78 | Masculino |          | 13  | muito ativo  | 25.46939 | 1240.9   | 1408.124 | 1244.64  | 1323.979 |
| 911 | 78 | Feminino  |          | 13  | insuf. ativo | 20.95661 | 1270.45  | 1435.086 | 1270.14  | 1342.727 |
| 912 | 29 | Feminino  | 250      | 7   | insuf. ativo | 20.96436 | 1547.94  | 1668.247 | 1243.43  | 1324.319 |
| 913 | 53 | Masculino | 400      | 5   | muito ativo  | 36.32813 | 2110.985 | 2045.943 | 1506.875 | 1509.1   |
| 914 | 41 | Feminino  | 400      | 5   | muito ativo  | 18.35938 | 608.47   | 808.8169 | 591.435  | 764.2544 |
| 915 | 77 | Masculino | 1080     | 6   | ativo        | 28.02768 | 2261.01  | 2224.047 | 1340.375 | 1399.091 |
| 916 | 51 | Masculino | 1240     | 8   | muito ativo  | 29.06977 | 2417.6   | 2343.602 | 2620.38  | 2295.003 |
| 917 | 25 | Masculino | 1240     | 8   | sedentário   | 23.58833 | 3445.76  | 3076.446 | 4756.32  | 3569.349 |
| 918 | 23 | Masculino | 1240     | 8   | ativo        | 25.35154 | 1483.62  | 1615.484 | 835      | 990.2576 |
| 919 | 52 | Feminino  | 1240     | 8   | insuf. ativo | 27.34375 | 1332.75  | 1489.807 | 1095.72  | 1207.127 |
| 920 | 20 | Feminino  | 1240     | 8   | ativo        | 23.62445 | 766.38   | 987.8912 | 750.82   | 916.9172 |
| 921 | 66 | Feminino  | 466.25   | 4   | muito ativo  | 35.99633 | 2399.605 | 2329.042 | 2036.835 | 1822.277 |
| 922 | 43 | Masculino | 475      | 8   | ativo        | 27.1809  | 1487.04  | 1618.301 | 1479.47  | 1504.755 |
| 923 | 80 | Feminino  |          | 11  | sedentário   | 21.63115 | 1121.74  | 1308.989 | 904.39   | 1049.395 |
| 924 | 62 | Feminino  | 650      | 8   | ativo        | 24.34964 | 667.11   | 892.9386 | 643.89   | 820.5999 |
| 925 | 57 | Feminino  | 7500     | 13  | sedentário   | 26.89232 | 1559.68  | 1671.783 | 1919.655 | 1821.074 |
| 926 | 75 | Feminino  | 207.5    | 0.5 | sedentário   | 29.72839 | 2318.84  | 2269.935 | 2045.34  | 1910.776 |
| 927 | 61 | Feminino  | 2100     | 13  | ativo        | 23.43374 | 1347.985 | 1491.428 | 1481.1   | 1501.314 |
| 928 | 77 | Feminino  |          | 5   | sedentário   | 24.67702 | 1253.4   | 1422.545 | 1199.73  | 1290.021 |
| 929 | 61 | Feminino  | 10500    | 13  | sedentário   | 23.30906 | 1767.865 | 1844.859 | 1548.355 | 1556.027 |
| 930 | 53 | Feminino  | 2426.667 | 8   | insuf. ativo | 29.29688 | 2526.235 | 2340.986 | 1804.945 | 1711.964 |
| 931 | 61 | Feminino  | 700      | 4   | sedentário   | 28.98114 | 1792.18  | 1862.729 | 1301.44  | 1363.004 |
| 932 | 67 | Masculino | 857.5    | 0   | ativo        | 32.66077 | 1302.58  | 1464.332 | 834.24   | 989.6036 |
| 933 | 43 | Feminino  | 142.5    | 6   | sedentário   | 22.04779 | 954.37   | 1049.438 | 1135.58  | 1134.532 |
| 934 | 33 | Masculino | 500      | 7   | insuf. ativo | 24.91349 | 2150.72  | 2075.282 | 2125.41  | 1914.051 |
| 935 | 33 | Feminino  | 500      | 7   | ativo        | 37.27907 | 1055.28  | 1235.391 | 1027.775 | 1144.222 |
| 936 | 25 | Feminino  | 174.2    | 7   | insuf. ativo | 20.3125  | 1971.97  | 1890.712 | 2559.31  | 2244.198 |
| 937 | 52 | Feminino  | 726.6667 | 8   | muito ativo  | 22.58955 | 1184.96  | 1349.022 | 1318.515 | 1382.401 |
| 938 | 27 | Feminino  | 726.6667 | 8   | muito ativo  | 22.46003 | 2696.655 | 2531.132 | 2173.72  | 1965.889 |
| 939 | 66 | Masculino | 321.2    | 3   | ativo        | 29.38476 | 1678.915 | 1771.048 | 1205.345 | 1290.756 |
| 940 | 50 | Feminino  | 185      | 8   | sedentário   | 29.31986 | 1043.455 | 1103.114 | 811.8    | 848.8408 |
| 941 | 27 | Feminino  | 185      | 8   | ativo        | 24.14152 | 2504.58  | 2406.066 | 1687.725 | 1608.392 |
| 942 | 37 | Masculino | 311.25   | 4   | ativo        | 27.74475 | 3165.32  | 2882.042 | 2485.08  | 2206.711 |

|     |    |           |          |    |              |          |          |          |          |          |
|-----|----|-----------|----------|----|--------------|----------|----------|----------|----------|----------|
| 943 | 29 | Feminino  | 311.25   | 4  | insuf. ativo | 21.00767 | 2922.67  | 2710.733 | 2046.8   | 1911.784 |
| 944 | 36 | Feminino  | 569.1667 | 4  | insuf. ativo | 28.60476 | 2118.32  | 2118.22  | 1272.72  | 1347.141 |
| 945 | 40 | Masculino | 2090     | 11 | ativo        | 23.25502 | 1622.9   | 1729.165 | 1132.52  | 1236.667 |
| 946 | 63 | Feminino  | 2900     | 13 | muito ativo  | 21.82995 | 1649.695 | 1705.259 | 1954.92  | 1839.753 |
| 947 | 71 | Feminino  | 1800     | 8  | ativo        | 25.59374 | 1766.295 | 1839.358 | 2150.37  | 1980.847 |
| 948 | 42 | Feminino  | 1896.667 | 11 | sedentário   | 30.46875 | 2320.62  | 2271.268 | 1599.24  | 1593.537 |
| 949 | 43 | Feminino  | 376.6667 | 7  | muito ativo  | 29.5858  | 1115.23  | 1301.681 | 766.27   | 929.912  |
| 950 | 82 | Feminino  | 683      | 4  | sedentário   | 19.56296 | 650.82   | 877.7557 | 632.65   | 810.5859 |
| 951 | 81 | Masculino | 447.4    | 7  | ativo        | 33.64198 | 1560.59  | 1656.965 | 1098.06  | 1198.887 |
| 952 | 72 | Feminino  | 447.4    | 7  | insuf. ativo | 26.53376 | 1064.075 | 1205.416 | 976.275  | 1102.064 |
| 953 | 67 | Masculino | 415      | 3  | ativo        | 26.44628 | 1871.67  | 1927.274 | 1488.43  | 1511.457 |
| 954 | 67 | Feminino  | 415      | 3  | insuf. ativo | 34.62682 | 1853.95  | 1913.356 | 1838.65  | 1766.212 |
| 955 | 80 | Masculino | 400      | 4  | ativo        | 30.32334 | 1056.39  | 1251.643 | 1133.34  | 1237.322 |
| 956 | 82 | Feminino  | 400      | 4  | insuf. ativo | 24.91077 | 1143.16  | 1327.639 | 1284.84  | 1356.547 |
| 957 | 75 | Feminino  | 416.25   | 4  | insuf. ativo | 32.8473  | 765.72   | 985.7162 | 918.625  | 1061.289 |
| 958 | 31 | Masculino | 233.3333 | 11 | sedentário   | 31.85596 | 762.46   | 984.2081 | 677.34   | 851.3015 |
| 959 | 32 | Feminino  | 233.3333 | 11 | insuf. ativo | 28.959   | 2357.085 | 2212.587 | 2057.43  | 1765.96  |
| 960 | 60 | Masculino | 500      | 5  | muito ativo  | 30.47052 | 1092.31  | 1278.807 | 963.95   | 1097.792 |
| 961 | 61 | Feminino  | 343.75   | 4  | insuf. ativo | 23.66144 | 1314.28  | 1474.225 | 1025.63  | 1150.185 |
| 962 | 65 | Masculino | 343.75   | 4  | ativo        | 20.57143 | 1291.11  | 1454.615 | 1335.59  | 1395.697 |
| 963 | 20 | Feminino  | 343.75   | 4  | muito ativo  | 21.63115 | 2007.07  | 2032.72  | 1474.16  | 1500.778 |
| 964 | 38 | Feminino  | 1025     | 11 | insuf. ativo | 20.20202 | 2034.285 | 2037.988 | 1682.545 | 1653.745 |
| 965 | 48 | Masculino | 1025     | 11 | muito ativo  | 22.09317 | 3296.915 | 2922.193 | 3726.19  | 2955.466 |
| 966 | 20 | Feminino  | 1025     | 11 | sedentário   | 17.31341 | 1328.685 | 1481.105 | 1095.94  | 1206.666 |
| 967 | 29 | Feminino  | 1366.667 | 13 | ativo        | 24.21875 | 1666.46  | 1731.975 | 1318.725 | 1332.475 |
| 968 | 31 | Masculino | 1366.667 | 13 | ativo        | 25.71166 | 4040.105 | 3386.872 | 2812.035 | 2328.619 |
| 969 | 80 | Masculino | 733.3333 | 4  | ativo        | 26.72993 | 1561.755 | 1674.968 | 1270.045 | 1312.657 |
| 970 | 76 | Feminino  | 282.5    | 1  | sedentário   | 30.84284 | 1446.355 | 1577.243 | 1334.56  | 1394.519 |
| 971 | 33 | Feminino  | 279.8    | 8  | ativo        | 24.08822 | 1050.1   | 1246.087 | 920.83   | 1063.244 |
| 972 | 42 | Masculino | 279.8    | 8  | muito ativo  | 22.22222 | 451.46   | 678.9116 | 263.92   | 442.0965 |
| 973 | 42 | Feminino  | 2814.286 | 13 | muito ativo  | 26.79494 | 1431.5   | 1556.377 | 912.595  | 1025.138 |
| 974 | 58 | Feminino  | 1028.75  | 10 | muito ativo  | 31.25    | 1663.2   | 1728.37  | 1133.46  | 1217.719 |
| 975 | 69 | Feminino  | 725      | 11 | muito ativo  | 22.83288 | 2112.395 | 2090.223 | 2280.715 | 2066.573 |
| 976 | 48 | Masculino | 600      | 11 | sedentário   | 25.60554 | 1601.575 | 1686.92  | 1478.11  | 1501.618 |
| 977 | 42 | Feminino  | 600      | 11 | muito ativo  | 28.01022 | 789.88   | 1008.615 | 945.735  | 1081.41  |
| 978 | 62 | Masculino | 650      | 4  | ativo        | 35.56395 | 2087.79  | 1982.912 | 1946.695 | 1770.477 |
| 979 | 62 | Feminino  | 650      | 4  | insuf. ativo | 26.22269 | 1490.305 | 1620.341 | 1286.62  | 1352.597 |
| 980 | 64 | Feminino  | 166.6667 | 4  | muito ativo  | 18.31426 | 1075.09  | 1243.444 | 1072.195 | 1144.603 |
| 981 | 31 | Masculino |          | 11 | muito ativo  | 28.08217 | 1816.64  | 1883.958 | 1553.77  | 1560.033 |
| 982 | 49 | Feminino  |          | 4  | sedentário   | 27.1809  | 1629.37  | 1734.395 | 908.67   | 1053.006 |
| 983 | 68 | Masculino | 662      | 4  | ativo        | 26.29758 | 1943.355 | 1953.231 | 2206.265 | 1858.365 |



|      |    |           |          |     |              |          |          |          |          |          |
|------|----|-----------|----------|-----|--------------|----------|----------|----------|----------|----------|
| 984  | 62 | Feminino  | 662      | 4   | insuf. ativo | 22.37034 | 1772.51  | 1833.41  | 1526.6   | 1530.186 |
| 985  | 69 | Masculino |          | 11  | muito ativo  | 24.224   | 2099.84  | 2104.086 | 2690.02  | 2339.994 |
| 986  | 66 | Masculino | 350      | 4   | sedentário   | 39.44208 | 1292.78  | 1456.031 | 904.85   | 1049.783 |
| 987  | 60 | Feminino  | 350      | 4   | insuf. ativo | 29.82325 | 1291.04  | 1454.556 | 908.56   | 1052.913 |
| 988  | 71 | Feminino  | 343.6667 | 8   | sedentário   | 18.81892 | 1220.92  | 1394.765 | 1031.39  | 1154.899 |
| 989  | 72 | Masculino | 450      | 4   | sedentário   | 25.88057 | 1023.28  | 1208.5   | 946.41   | 1068.782 |
| 990  | 70 | Feminino  | 450      | 4   | insuf. ativo | 36.85307 | 678.15   | 894.0699 | 553.64   | 732.1127 |
| 991  | 74 | Feminino  | 500      | 4   | ativo        | 23.30906 | 1202.48  | 1369.887 | 1198.56  | 1287.927 |
| 992  | 65 | Masculino | 750      | 4   | muito ativo  | 25.51021 | 1780.13  | 1855.065 | 1384.81  | 1433.317 |
| 993  | 65 | Feminino  | 750      | 4   | insuf. ativo | 28.93518 | 3008.44  | 2771.633 | 2465.97  | 2194.143 |
| 994  | 64 | Masculino | 550      | 11  | muito ativo  | 25.1559  | 1836.115 | 1858.195 | 1287.805 | 1316.598 |
| 995  | 38 | Masculino | 450      | 8   | ativo        | 30.11938 | 1401.54  | 1547.455 | 1450.92  | 1483.331 |
| 996  | 48 | Feminino  | 525      | 9   | ativo        | 20.95717 | 1630.825 | 1726.429 | 1409.245 | 1427.722 |
| 997  | 32 | Masculino | 383.3333 | 8   | muito ativo  | 22.94812 | 1464.055 | 1599.072 | 1726.235 | 1682.386 |
| 998  | 31 | Feminino  | 383.3333 | 8   | ativo        | 21.64412 | 1190.04  | 1361.07  | 2126.69  | 1942.129 |
| 999  | 50 | Feminino  | 550      | 1   | insuf. ativo | 25.71166 | 1385.095 | 1533.711 | 1271.455 | 1343.944 |
| 1000 | 74 | Feminino  | 372.5    | 0.5 | insuf. ativo | 31.14187 | 454.44   | 681.9809 | 473.68   | 659.9081 |
| 1001 | 52 | Feminino  | 700      | 5   | muito ativo  | 18.72417 | 1620.9   | 1727.547 | 1242.2   | 1323.357 |
| 1002 | 47 | Feminino  | 700      | 5   | insuf. ativo | 35.51136 | 1772.08  | 1622.233 | 1388.71  | 1156.552 |
| 1003 | 52 | Feminino  | 620      | 8   | muito ativo  | 25.53671 | 1954.69  | 1962.497 | 1285.015 | 1241.13  |
| 1004 | 28 | Masculino | 318.75   | 7   | muito ativo  | 22.53086 | 2146.09  | 1994.413 | 1339.96  | 1344.111 |
| 1005 | 23 | Masculino | 318.75   | 7   | muito ativo  | 20.19509 | 2439.07  | 2359.53  | 1742.21  | 1697.375 |

| id | energy_density | alcoholicbev_portion | beans_portion | breads_portion | butter_portion | cakes_portion | cheese_portion | coffee_portion | coldcuts_portion | eggs_portion |
|----|----------------|----------------------|---------------|----------------|----------------|---------------|----------------|----------------|------------------|--------------|
| 1  | 1.110746       |                      |               |                | 15             |               |                | 50.05          |                  | 45           |
| 2  | 1.585495       | 187.505              |               | 50             |                |               |                |                |                  |              |
| 3  | 1.454453       |                      | 107.5         | 50             | 30             |               | 55             | 96.09          |                  |              |
| 4  | 2.067685       |                      |               | 115            |                |               | 60             | 50.05          | 45               |              |
| 5  | 0.8731734      |                      | 107.5         |                |                |               |                | 176.83         |                  |              |
| 6  | 0.9073365      |                      |               | 42.5           |                |               |                | 240.22         |                  |              |
| 7  | 1.696159       |                      | 86            |                |                |               |                | 100.09         |                  |              |
| 8  | 1.134732       |                      | 86            | 75             | 15             |               |                | 114.1033       |                  |              |
| 9  | 1.372135       |                      | 64.5          | 75             | 15             |               |                | 105.7633       |                  |              |
| 10 | 1.295244       |                      |               | 50             |                |               | 70             |                |                  |              |
| 11 | 1.521498       |                      |               | 37.5           | 15             |               | 70             | 240            |                  | 100          |
| 12 | 1.175569       |                      | 64.5          | 20             | 35.625         | 60            | 34.66667       | 112.1033       |                  |              |
| 13 | 1.164808       |                      | 86            | 53.33333       | 12.5           |               |                | 127.2817       |                  |              |
| 14 | 1.16011        |                      | 215           | 100            | 15             |               | 15             | 120.11         | 34               |              |
| 15 | 1.130792       |                      | 105           | 104            | 18.75          |               |                | 80.07          |                  |              |
| 16 | 1.084736       |                      | 107.5         | 52             |                |               |                | 120.11         |                  |              |
| 17 | 1.220291       |                      | 139.75        | 93.66666       | 45             |               |                | 144.8033       |                  |              |
| 18 | 1.240497       |                      | 78.6          | 50             | 15             |               | 48.33333       | 70.06667       | 30               |              |
| 19 | 1.370572       |                      | 52.4          | 58.33333       | 7.5            |               | 32.5           | 97.59          | 15               |              |
| 20 | 0.7949743      |                      | 107.5         | 150            | 22.5           |               |                | 333.31         |                  |              |
| 21 | 1.11814        |                      | 86            | 26             |                |               |                | 57.38          |                  | 50           |
| 22 | 1.010273       |                      | 32.76         |                |                |               |                |                |                  |              |
| 23 | 1.363244       |                      |               |                |                |               | 55             | 80.07          |                  |              |
| 24 | 1.604332       |                      |               | 50             |                | 60            | 15             | 120.11         |                  |              |
| 25 | 1.447385       |                      | 179.1667      | 62.5           | 11.25          |               |                | 90.8375        |                  | 50           |
| 26 | 1.129985       |                      | 86            | 75             | 15             | 60            |                | 180.1675       |                  |              |
| 27 | 1.32368        |                      | 81.88         | 58.33333       | 26.25          |               |                | 108.0667       |                  |              |
| 28 | 1.283911       |                      | 67.75         | 27.5           | 11.26          |               | 25             | 97.09          |                  |              |
| 29 | 1.223752       |                      | 137.25        | 50             | 15             |               | 15             | 166.8267       |                  | 50           |
| 30 | 0.990928       | 703.01               | 63.6          |                |                |               |                | 112.4367       |                  |              |
| 31 | 0.9730501      |                      | 63.6          |                |                | 60            |                | 62.72667       |                  |              |
| 32 | 1.538592       |                      | 26.22         | 50             | 37.5           |               | 40             | 150.8067       |                  |              |
| 33 | 1.377161       |                      | 107.5         | 250            | 56.25          |               |                | 1153.06        |                  |              |
| 34 | 1.298621       |                      | 82.3          | 50             |                |               |                | 75.07          |                  |              |
| 35 | 1.610357       |                      | 43            | 50             |                |               | 20             |                | 34               | 50           |
| 36 | 1.211003       |                      | 65.6          |                | 12.5           | 120           |                | 165.4833       |                  |              |
| 37 | 1.305522       |                      |               | 25             |                |               | 30             |                |                  |              |
| 38 | 1.055046       |                      | 32.76         | 50             | 7.5            |               |                | 49.045         |                  |              |
| 39 | 1.214182       |                      |               | 50             |                |               | 10             | 75.07          | 15               |              |
| 40 | 1.029331       |                      | 86.26         | 30             | 15             |               | 29.33333       | 288.27         |                  |              |

|    |           |          |          |          |       |     |     |          |      |      |
|----|-----------|----------|----------|----------|-------|-----|-----|----------|------|------|
| 41 | 0.9273288 |          | 258      | 50       |       |     | 80  |          |      |      |
| 42 | 0.889724  | 472.0267 | 87.5     | 130      | 60    |     |     | 198.5167 |      |      |
| 43 | 1.14161   |          |          | 54       | 26.25 |     | 20  |          | 30   |      |
| 44 | 0.8133891 | 477.045  |          | 27.66667 | 18.75 |     | 75  | 291.27   | 15   | 75   |
| 45 | 1.256593  |          | 43       | 64       | 18.75 |     |     | 186.1511 |      |      |
| 46 | 1.578908  |          |          | 100      |       |     |     | 50.05    |      |      |
| 47 | 1.352531  |          |          | 73       |       |     | 19  | 50.05    | 17   |      |
| 48 | 1.357057  |          | 86       | 50       |       |     | 20  |          |      | 50   |
| 49 | 1.217101  |          | 86       | 25       |       | 60  | 40  | 225.21   |      |      |
| 50 | 1.295915  |          |          |          |       |     | 30  | 107.6    |      |      |
| 51 | 0.8877156 |          | 58.95    | 20       |       |     | 7.5 | 168.16   |      |      |
| 52 | 1.806879  |          | 86       |          |       |     |     |          |      |      |
| 53 | 1.308588  |          | 86       | 30       | 45    |     |     | 300.28   |      |      |
| 54 | 1.224232  |          | 129      | 45       | 7.5   |     |     | 80.07    |      |      |
| 55 | 1.170588  |          | 98.26    |          |       |     |     | 50.05    |      |      |
| 56 | 1.068213  |          | 122      | 50       | 7.5   |     |     | 185.1733 |      | 45   |
| 57 | 1.185911  |          | 199      | 50       | 15    |     |     | 153.1433 |      | 45   |
| 58 | 1.004103  |          | 65.5     | 50       | 15    |     |     | 192.18   |      |      |
| 59 | 1.187647  |          |          | 20       |       |     |     | 48.04    |      |      |
| 60 | 1.25307   |          | 263.375  | 50       |       |     | 15  | 210.1925 |      | 100  |
| 61 | 1.073133  | 1506.45  |          |          |       |     |     | 144.13   |      |      |
| 62 | 0.928941  |          | 56.1     | 50       | 7.5   |     | 20  | 94.08749 |      |      |
| 63 | 1.20852   | 1205.17  | 164.8333 | 69.33334 | 32    |     | 50  |          | 30   |      |
| 64 | 1.348827  |          | 140      | 100      | 15    |     |     | 97.09    |      |      |
| 65 | 1.080849  |          | 129      | 200      | 7.5   |     |     | 92.95389 |      |      |
| 66 | 1.469462  |          | 258      | 37.5     | 15    |     |     | 96.09    |      |      |
| 67 | 1.234787  |          | 107.5    | 50       | 18.75 |     |     | 96.09    |      |      |
| 68 | 1.413205  |          | 86       | 22.33333 |       |     | 20  | 48.04    |      |      |
| 69 | 0.8381184 |          | 75.25    |          |       |     |     | 180.1675 |      |      |
| 70 | 1.248461  | 1054.52  | 107.5    |          |       |     | 30  | 136.1233 |      |      |
| 71 | 1.215163  |          | 93.66666 |          |       |     |     | 144.13   |      |      |
| 72 | 1.566866  |          | 64.5     |          |       | 120 |     | 175.6656 |      |      |
| 73 | 1.389384  |          | 86       |          |       | 100 |     | 192.18   |      | 50   |
| 74 | 1.489025  |          |          | 50       | 7.5   |     |     | 96.09    |      | 50   |
| 75 | 1.092051  |          | 86       | 50       |       |     | 20  | 75.07    |      |      |
| 76 | 1.160617  |          | 161.25   | 75       | 4.75  |     | 10  | 96.09    |      |      |
| 77 | 1.049612  |          | 96.75    | 50       |       |     |     | 160.1467 |      |      |
| 78 | 1.602798  |          | 30       | 60       |       |     |     |          |      |      |
| 79 | 1.244975  |          | 105.65   | 68.75    | 18.75 |     | 20  | 57.055   | 17   |      |
| 80 | 1.155707  |          | 86       | 91.66666 | 22.5  | 60  | 15  | 96.7025  |      |      |
| 81 | 1.022531  |          |          | 30       |       |     | 15  | 160.15   | 16.5 | 16.5 |

|     |           |         |          |          |  |     |       |          |          |          |    |
|-----|-----------|---------|----------|----------|--|-----|-------|----------|----------|----------|----|
| 82  | 1.05672   | 703.01  | 52.4     | 50       |  |     |       | 44.36833 | 34       |          |    |
| 83  | 1.084996  |         | 107.5    | 75       |  |     | 15    |          | 15       |          |    |
| 84  | 0.7087841 |         | 32.76    |          |  |     |       |          |          |          |    |
| 85  | 1.173142  |         | 83.315   | 50       |  |     |       | 114.1033 |          |          |    |
| 86  | 0.9675596 | 44.74   | 71.66666 | 60       |  | 100 |       | 276.6843 |          | 50       |    |
| 87  | 1.389948  |         | 129      | 50       |  |     | 15    | 50.05    |          |          |    |
| 88  | 0.9676392 | 250.315 | 75.25    | 50       |  |     | 26.25 | 142.6325 |          |          |    |
| 89  | 1.085482  |         | 86       | 25       |  |     |       | 84.305   |          |          |    |
| 90  | 1.136492  |         | 129      | 40       |  |     |       | 160.15   |          |          |    |
| 91  | 1.127596  |         |          | 62.5     |  |     | 11.25 | 96.75667 |          |          |    |
| 92  | 1.086803  | 477.2   | 172      |          |  |     |       | 100.09   |          |          |    |
| 93  | 1.135365  |         | 107.5    | 50       |  | 30  |       | 123.115  |          |          |    |
| 94  | 1.217237  |         | 39.3     | 50       |  |     | 15    | 110.6033 |          |          |    |
| 95  | 1.176975  |         | 215      | 50       |  |     |       |          |          |          |    |
| 96  | 1.271372  |         | 96.75    | 83.33334 |  |     | 22.5  | 107.5717 | 30       |          |    |
| 97  | 1.129029  |         | 86       | 100      |  |     | 7.5   | 100.09   |          | 50       |    |
| 98  | 1.238628  |         | 88.43    | 50       |  |     |       | 22.5     | 37.535   |          |    |
| 99  | 1.35701   | 58.75   | 96.75    | 100      |  |     | 26.25 | 258.24   |          | 75       |    |
| 100 | 1.201512  |         | 105.62   | 50       |  |     | 12.5  | 82.075   |          | 50       |    |
| 101 | 1.208802  |         | 43       | 37.5     |  | 30  |       | 62.56    |          |          |    |
| 102 | 0.8817567 |         | 58.45    | 25       |  |     |       | 122.585  |          |          |    |
| 103 | 1.468772  |         | 53.75    | 91.66666 |  |     | 18.75 | 123.1133 |          |          |    |
| 104 | 1.458939  |         | 78.83334 | 50       |  | 100 |       | 15       | 144.135  |          |    |
| 105 | 1.279122  |         | 71.88    | 101.6667 |  | 60  |       |          | 72.565   |          |    |
| 106 | 1.217691  |         | 100.3333 | 53.33333 |  |     | 6.75  | 66.3125  |          | 50       |    |
| 107 | 1.31925   |         | 86       |          |  |     |       |          |          |          |    |
| 108 | 1.219731  |         | 86       | 27       |  |     | 10    | 112.605  |          |          |    |
| 109 | 0.8901556 |         |          | 50       |  |     |       | 96.09    |          |          |    |
| 110 | 0.7848913 |         | 107.5    | 70       |  | 30  |       | 15       | 390.16   |          |    |
| 111 | 1.300164  |         | 52.4     | 25       |  | 30  |       | 5        | 182.67   |          |    |
| 112 | 1.234714  |         | 31.33    | 75       |  |     | 15    |          | 81.97945 |          |    |
| 113 | 1.391093  |         | 129      | 100      |  |     | 7.5   |          | 30       | 90       |    |
| 114 | 1.077793  |         | 86       | 62.5     |  |     |       |          | 30       |          |    |
| 115 | 0.7209952 |         |          | 45       |  |     |       |          | 40       | 78.07    |    |
| 116 | 1.318329  | 703.01  | 258      | 50       |  |     | 40    |          | 37.5     | 70.565   |    |
| 117 | 1.198047  |         | 258      |          |  |     |       |          |          |          |    |
| 118 | 1.264863  |         |          | 35       |  |     | 22.5  |          |          | 109.6    |    |
| 119 | 1.148104  |         | 43       | 30       |  |     |       |          | 20       | 134.625  |    |
| 120 | 0.9228683 |         | 86       | 50       |  |     |       |          |          | 96.09    |    |
| 121 | 1.45942   |         |          | 50       |  |     | 7.5   |          |          | 47.545   |    |
| 122 | 1.084939  |         | 147.42   | 100      |  |     | 30    |          |          | 170.1567 | 50 |

|     |           |         |          |          |          |     |      |          |    |     |
|-----|-----------|---------|----------|----------|----------|-----|------|----------|----|-----|
| 123 | 1.209557  |         | 129      | 137.5    | 82.5     |     |      |          |    |     |
| 124 | 1.153593  |         | 101      | 81.25    | 30       |     |      | 255.5014 |    |     |
| 125 | 1.400703  | 148.36  | 34.6     | 37.5     | 25       |     |      | 85.08    |    |     |
| 126 | 1.423606  |         | 96.75    | 110      | 40       |     |      |          |    | 50  |
| 127 | 1.055307  |         | 86.75    | 50       | 7.5      |     |      | 140.5344 |    |     |
| 128 | 1.37305   |         | 86       | 66.66666 | 10.83333 |     |      | 90.75    |    |     |
| 129 | 1.142961  |         | 71.55    | 50       | 8        |     |      | 86.58    |    |     |
| 130 | 0.9836811 |         | 86       |          |          |     |      |          |    |     |
| 131 | 1.35271   |         | 107.5    | 50       | 7.5      |     |      | 60.06    |    |     |
| 132 | 1.508466  |         | 150.5    | 100      |          |     | 60   | 120.11   |    |     |
| 133 | 1.106959  |         | 107.5    | 75       | 7.5      |     | 60   |          | 45 | 90  |
| 134 | 1.23576   | 1054.52 | 43       | 60       |          |     | 37.5 | 48.04    | 30 |     |
| 135 | 1.256747  |         | 86       | 50       |          |     | 22.5 |          | 30 | 90  |
| 136 | 1.033642  |         | 107.5    |          |          |     |      | 50.05    |    |     |
| 137 | 1.329159  |         | 43       | 50       | 15       |     |      |          |    |     |
| 138 | 0.9391053 |         |          |          |          |     |      |          |    |     |
| 139 | 1.964105  | 47      |          |          |          |     |      |          |    |     |
| 140 | 2.015233  |         |          | 200      |          |     | 30   |          |    | 30  |
| 141 | 2.425304  |         |          | 125      |          |     | 20   |          |    | 15  |
| 142 | 1.244564  |         | 30.43333 | 45       | 10       |     | 180  | 73.06667 |    |     |
| 143 | 1.189859  |         | 86       | 50       |          |     |      | 127.12   |    |     |
| 144 | 1.24897   |         | 43       | 50       | 10       |     |      | 100.09   |    |     |
| 145 | 1.395402  |         | 78.83334 | 162.5    | 46.875   |     |      | 87.58    |    |     |
| 146 | 1.247471  |         |          | 75       | 7.5      |     |      | 84.075   |    |     |
| 147 | 1.356417  |         | 43       | 75       | 11.25    | 120 |      | 137.46   |    |     |
| 148 | 1.110493  |         | 40.885   | 25       |          |     | 17.5 | 69.73    |    |     |
| 149 | 1.274507  |         |          |          |          | 120 |      | 100.095  |    |     |
| 150 | 1.28346   |         | 93.16666 | 50       | 15       | 200 |      | 158.65   |    | 50  |
| 151 | 1.265202  |         | 172      | 120      |          |     |      | 111.105  |    | 50  |
| 152 | 1.216191  |         | 78.75    | 75       | 18.75    |     |      | 145.334  |    | 45  |
| 153 | 1.57566   | 351.51  | 258      | 48.75    |          | 150 | 40   | 106.2225 | 30 | 50  |
| 154 | 1.507278  |         | 43       | 50       |          |     | 40   | 120.11   | 30 |     |
| 155 | 1.015713  |         | 37.88    | 41.66667 | 11.25    |     |      | 84.08    |    |     |
| 156 | 1.019668  |         |          |          |          | 60  |      | 102.8467 |    |     |
| 157 | 0.8463845 |         |          |          |          |     |      | 529.3489 |    |     |
| 158 | 1.401946  |         | 208.95   | 100      |          | 90  |      | 22.52    |    |     |
| 159 | 1.065754  |         | 139.75   | 27.5     |          |     | 16   | 125.12   |    |     |
| 160 | 1.175794  | 1205.17 | 129      |          |          |     |      |          |    |     |
| 161 | 1.087619  |         | 41.1     | 50       | 12.5     |     |      | 155.14   |    |     |
| 162 | 1.140966  | 1205.17 | 93.16666 |          |          |     |      | 133.625  |    | 100 |
| 163 | 1.221081  |         |          |          |          |     | 7.5  |          |    |     |

|     |           |         |          |          |          |       |       |          |    |    |
|-----|-----------|---------|----------|----------|----------|-------|-------|----------|----|----|
| 164 | 1.509164  |         | 78.6     | 50       | 22.5     |       | 20    | 25.02    |    |    |
| 165 | 1.216927  |         | 96.75    | 125      | 20       |       |       | 154.5175 |    |    |
| 166 | 1.069566  |         | 100      | 50       |          |       |       | 216.2    |    |    |
| 167 | 1.213573  |         | 258      | 25       |          |       |       | 73.57    |    |    |
| 168 | 1.704846  |         |          |          |          |       |       | 73.57    |    |    |
| 169 | 1.069929  |         | 86       |          |          |       |       | 180.165  |    |    |
| 170 | 1.554998  |         | 56.5     | 110      |          |       | 43    |          |    |    |
| 171 | 1.289996  |         | 86       | 100      | 30       |       |       | 39.035   |    |    |
| 172 | 1.423834  |         |          | 30       | 15       |       |       | 61.06    |    |    |
| 173 | 1.267446  |         |          | 58.33333 | 11.66667 |       |       | 53.54667 |    |    |
| 174 | 1.339115  |         | 86       | 50       | 7.5      |       |       | 48.04    |    |    |
| 175 | 1.052491  |         | 107.5    | 75       |          |       |       | 96.09    |    |    |
| 176 | 0.8579765 |         |          |          |          |       |       | 360.33   |    |    |
| 177 | 1.207213  |         | 86       | 50       | 7.5      |       |       | 72.07    |    |    |
| 178 | 1.316312  |         | 476      | 50       | 40       |       | 30    | 72.07    |    |    |
| 179 | 1.312539  |         | 107.5    | 50       |          |       | 55.25 | 120.11   |    |    |
| 180 | 1.379431  |         | 59       | 50       | 6        | 29.99 |       | 83.325   |    |    |
| 181 | 1.56511   |         |          |          |          |       |       | 72.07    |    |    |
| 182 | 0.9857157 |         | 172      |          |          |       |       | 264.24   |    | 30 |
| 183 | 1.369535  |         | 64.5     | 50       |          |       |       |          |    |    |
| 184 | 1.248106  | 351.51  | 129      | 37.5     | 7.5      |       |       | 72.07    | 30 |    |
| 185 | 1.108672  |         | 52.4     | 50       |          |       |       | 51.295   |    |    |
| 186 | 0.9360152 |         | 104.8    |          |          |       |       | 16.62    |    |    |
| 187 | 1.229328  |         | 86       | 50       | 22.5     |       |       | 195.18   |    |    |
| 188 | 0.8524001 | 2109.04 |          | 50       |          |       |       |          |    |    |
| 189 | 1.093997  |         | 43       | 50       |          |       |       | 66.66666 |    | 30 |
| 190 | 1.384661  |         | 65.6     |          |          | 60    |       | 107.2011 |    |    |
| 191 | 0.8536687 |         | 43       | 37.5     |          | 60    |       | 69.565   | 30 |    |
| 192 | 1.705565  |         | 104.8    |          |          |       |       | 72.07    |    |    |
| 193 | 1.165112  |         | 86       | 40       | 7.5      |       | 30    | 90.8325  |    |    |
| 194 | 1.14496   |         | 114.6667 | 50       | 7.5      |       | 45    | 73.07    |    |    |
| 195 | 1.057713  |         | 100.3333 | 50       | 7.5      |       | 60    | 112.77   |    |    |
| 196 | 1.092128  |         | 86       |          |          |       |       | 50.04    |    | 50 |
| 197 | 0.9857618 |         | 172      |          |          |       |       | 144.13   |    |    |
| 198 | 1.631123  |         |          | 30       |          |       | 17.5  | 192.18   | 5  | 5  |
| 199 | 1.040592  |         | 32.26    | 50       |          |       |       | 75.07    |    | 50 |
| 200 | 1.0738    |         | 107.5    | 100      |          |       |       | 83.325   |    |    |
| 201 | 1.174448  |         | 123.63   |          |          |       |       | 192.175  |    |    |
| 202 | 1.015213  |         | 64.5     | 50       |          |       |       | 133.62   |    |    |
| 203 | 1.328494  |         | 80.625   | 43.33333 |          |       |       | 45.04    |    |    |
| 204 | 1.155619  | 351.51  | 129      | 53.33333 | 15       |       |       | 143.635  |    |    |

|     |           |         |          |          |          |    |      |          |    |    |
|-----|-----------|---------|----------|----------|----------|----|------|----------|----|----|
| 205 | 1.57971   |         | 65.5     | 75       | 15       |    |      | 72.07    |    |    |
| 206 | 1.210261  |         | 78.6     | 100      | 15       |    |      | 108.1    |    |    |
| 207 | 1.359504  |         | 344      | 100      |          |    |      | 144.13   |    |    |
| 208 | 0.8070871 |         |          | 25       |          |    |      | 240.22   |    |    |
| 209 | 1.300465  |         |          | 50       | 15       |    |      | 144.13   |    |    |
| 210 | 1.171974  |         | 64.5     | 50       |          |    |      | 72.07    |    |    |
| 211 | 1.290154  |         |          | 83.75    | 7.5      |    | 30   | 276.26   |    | 50 |
| 212 | 1.213842  |         |          | 68.75    | 7.5      |    | 30   | 135.6275 |    |    |
| 213 | 1.167692  | 326.52  |          | 50       | 22.5     | 30 | 21.8 | 123.115  |    |    |
| 214 | 0.9848767 |         | 43.79    | 50       | 7.5      |    |      | 104.3475 |    |    |
| 215 | 1.367673  |         | 61.13334 | 50       | 20.83333 |    |      | 75.07    |    | 50 |
| 216 | 1.501979  |         | 210.97   | 125      | 22.5     |    | 30   | 133.125  |    |    |
| 217 | 1.187209  |         | 102.25   |          |          |    |      | 400.36   |    |    |
| 218 | 1.188609  |         | 139.75   | 70       | 3.2      |    |      | 162.82   |    |    |
| 219 | 1.196356  |         | 114.6667 | 50       |          |    |      | 118.11   |    |    |
| 220 | 1.272895  |         | 172      | 100      |          |    | 80   |          | 60 |    |
| 221 | 1.236592  |         | 32.76    | 50       | 6.25     |    | 185  | 25.02    |    |    |
| 222 | 1.524322  | 1054.52 | 26.2     |          |          |    |      | 192.18   |    |    |
| 223 | 1.092771  |         | 143.3333 |          |          |    |      | 80.07    |    |    |
| 224 | 1.051557  |         |          | 45       | 11.25    |    |      | 160.145  |    | 50 |
| 225 | 0.800336  |         | 129      | 60       |          |    |      | 100.09   |    |    |
| 226 | 0.8296735 |         | 110.6667 | 30       | 5        |    |      | 123.115  |    | 20 |
| 227 | 1.41488   |         | 65.53333 | 50       | 18.75    |    |      | 74.32    |    |    |
| 228 | 1.181409  | 351.51  | 78.53333 | 50       | 5        | 60 |      | 195.18   |    |    |
| 229 | 1.169616  |         | 98.3     | 50       | 7.5      |    |      | 192.18   | 15 |    |
| 230 | 1.48858   |         | 65.6     | 100      | 15       |    |      | 75.07    |    |    |
| 231 | 1.102791  |         | 73.4     | 66.66666 |          |    |      | 80.07333 |    |    |
| 232 | 1.067213  |         | 73.4     | 66.66666 |          |    |      | 80.07333 |    |    |
| 233 | 1.26215   |         | 227.4    | 50       |          |    | 20   | 121.11   |    |    |
| 234 | 1.092289  | 208.81  | 61.2     | 42.5     | 10       |    |      | 88.3325  |    |    |
| 235 | 1.275173  |         | 172      | 25       |          |    | 30   | 150.14   |    |    |
| 236 | 1.229649  |         | 26.2     |          |          | 60 |      |          |    |    |
| 237 | 1.285753  |         |          | 25       |          |    | 20   | 118.61   |    |    |
| 238 | 1.42709   |         | 107.5    |          |          |    |      | 100.09   |    |    |
| 239 | 1.22206   |         | 96.75    | 50       | 11.5     | 40 | 20   | 150.5374 | 15 |    |
| 240 | 1.139772  |         |          |          |          |    | 60   | 144.13   |    | 50 |
| 241 | 0.8068632 |         |          | 50       |          |    | 22.5 | 85.08    |    |    |
| 242 | 1.473972  |         |          |          |          | 50 |      | 90.75    |    |    |
| 243 | 1.341266  |         | 100.3333 | 47       | 7.5      |    |      | 96.09    |    |    |
| 244 | 1.535159  |         | 98.54    |          |          | 30 |      | 130.62   |    |    |
| 245 | 1.177683  |         | 64.5     | 50       | 7.5      |    |      | 48.04    |    |    |

|     |           |         |          |          |          |        |       |          |       |    |
|-----|-----------|---------|----------|----------|----------|--------|-------|----------|-------|----|
| 246 | 0.9349295 |         | 69.2     | 50       | 10.83333 |        | 18    | 110.94   |       |    |
| 247 | 1.149046  |         | 96.75    | 150      | 45       |        |       | 206.695  |       |    |
| 248 | 1.179707  |         |          | 60       | 15       | 90     |       | 146.135  |       |    |
| 249 | 0.9711918 |         | 86       | 50       |          |        | 20    |          |       |    |
| 250 | 1.250509  |         | 98.26    | 50       | 7.5      |        | 20    | 160.14   |       |    |
| 251 | 1.134714  |         | 52.4     | 32.5     | 7.5      | 60     | 16.25 | 235.8267 |       |    |
| 252 | 1.343181  |         | 100.3333 | 43.75    | 22.5     |        |       | 83.86285 |       |    |
| 253 | 1.07155   |         | 78.6     | 37.5     | 7.5      |        |       | 247.735  |       |    |
| 254 | 1.080882  |         |          | 29       | 15       |        |       | 104.0933 |       | 4  |
| 255 | 1.119155  |         | 65.6     |          |          |        |       |          |       |    |
| 256 | 0.8203422 |         |          |          |          | 18     |       | 150.14   |       |    |
| 257 | 1.130862  |         | 75.25    | 75       |          |        |       | 139.6275 |       | 50 |
| 258 | 0.9456141 |         | 64.5     | 50       |          |        | 20    | 123.4467 |       |    |
| 259 | 1.086049  |         | 86       |          |          |        |       | 258.9066 |       |    |
| 260 | 1.231357  |         | 53.75    | 55       |          |        | 15    |          |       |    |
| 261 | 1.241705  | 1205.17 |          |          |          |        |       | 120.11   |       | 50 |
| 262 | 1.255812  |         | 75.25    | 100      | 15       |        | 90    | 45.04    |       |    |
| 263 | 0.8237185 |         | 26       | 37.5     | 7.5      |        | 7.5   | 180.1675 |       |    |
| 264 | 1.177322  |         | 46.13334 | 82.5     | 20.625   |        | 20    | 231.55   |       |    |
| 265 | 1.275471  |         | 242.3933 | 100      | 30       |        |       | 126.6175 |       |    |
| 266 | 0.9312384 |         | 86       | 50       |          |        |       | 91.08333 |       |    |
| 267 | 1.037569  | 351.51  | 107.5    |          |          |        |       | 25.02    |       |    |
| 268 | 1.118864  |         | 107.5    | 25       | 7.5      |        |       |          |       |    |
| 269 | 0.923289  |         | 107.5    |          | 22.5     |        | 56.25 | 248.592  | 22.5  |    |
| 270 | 1.019219  |         |          | 60       |          |        | 22.3  |          |       |    |
| 271 | 0.995142  |         | 175      | 50       |          |        | 40    | 60.06    | 30    |    |
| 272 | 0.9587576 |         | 65.6     | 25       |          |        | 15    | 100.09   |       |    |
| 273 | 1.031777  |         |          | 43.33333 |          |        | 16    | 112.105  |       |    |
| 274 | 1.606296  |         | 100      | 100      | 37.5     |        |       | 75.07    |       |    |
| 275 | 1.620073  |         | 65.6     | 50       | 15       |        |       | 72.07    |       | 5  |
| 276 | 1.153183  |         | 75.805   | 20       |          |        |       | 63.32278 |       | 5  |
| 277 | 1.092652  |         | 525      |          |          |        |       |          |       | 5  |
| 278 | 0.9569489 |         | 52.4     |          |          |        |       | 90.08    |       | 25 |
| 279 | 1.156797  |         | 43       |          |          |        |       | 186.2767 |       |    |
| 280 | 1.593962  |         | 43       | 25       | 15       |        |       | 67.54    |       |    |
| 281 | 1.253068  |         | 86       | 20       | 30       |        | 25    | 50       | 18.75 |    |
| 282 | 1.075007  |         |          | 50       | 7.5      |        | 15    | 112.605  |       |    |
| 283 | 1.477932  |         | 70       | 58.33333 | 10       | 179.94 |       | 64.05666 |       |    |
| 284 | 1.102274  |         | 86       | 100      |          |        |       | 192.18   |       |    |
| 285 | 1.136618  |         | 86       | 50       | 7.5      |        |       | 50.05    |       |    |
| 286 | 1.086128  |         | 68       |          | 20       |        |       | 82.075   |       |    |



|     |           |         |          |          |         |      |      |          |    |      |
|-----|-----------|---------|----------|----------|---------|------|------|----------|----|------|
| 287 | 0.6765906 |         |          | 50       | 7.5     |      |      | 96.09    |    |      |
| 288 | 1.149925  |         | 104.8    | 50       | 6.02    |      |      | 144.135  |    |      |
| 289 | 1.323284  |         | 65.6     | 96       |         |      | 60   | 96.09    |    |      |
| 290 | 1.584134  |         | 43       |          |         |      |      | 72       |    |      |
| 291 | 1.308968  |         | 86       | 75       | 22.5    |      |      | 100.09   |    |      |
| 292 | 1.168926  |         | 65.6     | 50       | 17.8125 |      | 22.5 | 171.8267 |    | 50   |
| 293 | 1.368808  |         | 157.5    | 50       | 15      |      | 20   | 67.565   | 15 | 50   |
| 294 | 1.341509  |         |          | 116.6667 | 11.25   |      |      | 102.595  |    |      |
| 295 | 1.168417  |         | 26.2     | 100      | 22.5    |      |      | 125.12   |    |      |
| 296 | 1.213569  |         | 53.75    | 50       | 13.125  | 60   | 30   | 152.14   |    |      |
| 297 | 1.163627  |         | 86       | 50       |         |      | 40   | 89.08    | 30 |      |
| 298 | 1.420081  |         | 436      | 58.33333 | 50.5    |      |      | 362.835  |    |      |
| 299 | 1.13103   | 78.1    | 51.065   | 50       | 11.25   | 37.5 | 15   | 252.2325 |    |      |
| 300 | 1.206324  |         | 68       | 110      |         |      | 22.5 | 104.5975 | 15 |      |
| 301 | 1.26886   |         | 43       | 93.75    | 7.5     |      | 47.5 | 61.555   | 30 |      |
| 302 | 1.52913   | 351.51  | 107.5    | 50       | 15      |      |      | 120.11   |    |      |
| 303 | 1.621206  |         | 86       | 50       | 11.25   | 100  |      | 25.02    |    |      |
| 304 | 1.133158  |         | 107.5    | 100      |         |      |      | 120.11   | 15 |      |
| 305 | 1.721816  |         | 64.5     |          |         |      |      | 96.09    |    |      |
| 306 | 1.42425   |         | 114.6667 | 50       | 12.5    |      |      | 77.325   |    |      |
| 307 | 1.847201  |         | 140.26   | 50       |         |      |      |          |    | 50   |
| 308 | 1.321014  |         | 172      | 50       | 22.5    |      |      | 144.13   |    |      |
| 309 | 1.075093  | 703.01  | 215      |          |         |      |      |          |    |      |
| 310 | 1.090976  |         | 344      |          |         | 100  |      | 125.12   |    |      |
| 311 | 1.168306  |         | 344      |          |         | 100  |      | 66.72    |    |      |
| 312 | 1.100033  |         | 64.5     |          |         |      |      | 100.09   |    |      |
| 313 | 0.9591058 |         |          | 150      |         |      |      |          |    |      |
| 314 | 1.279578  | 433.86  |          | 50       | 15      |      |      | 45.04    |    |      |
| 315 | 1.129688  |         |          | 48.5     | 8       |      |      | 200.18   |    |      |
| 316 | 1.031721  |         |          | 55       | 11.5    |      | 20   | 125.12   |    |      |
| 317 | 1.222539  |         |          | 86.66666 | 19.5    |      |      | 250.23   |    | 37.5 |
| 318 | 1.062711  |         |          | 30       | 7.5     |      |      | 200.18   |    |      |
| 319 | 1.199667  |         |          | 100      | 15      |      | 40   | 72.07    | 40 | 20   |
| 320 | 1.095285  |         |          | 30       |         | 60   |      | 100.09   |    | 2.79 |
| 321 | 0.9167207 | 351.51  | 51.9     | 50       | 10.25   |      | 22.5 | 95.085   |    |      |
| 322 | 1.341925  |         | 131      | 50       | 23.5    | 180  |      | 122.4467 |    |      |
| 323 | 0.9055203 |         | 78.6     | 30       |         | 41   |      |          |    |      |
| 324 | 1.070593  |         | 182.6    | 50       |         |      |      | 37.53    |    |      |
| 325 | 1.247171  |         | 131      | 50       | 90      |      |      | 62.56    |    |      |
| 326 | 1.167813  |         |          | 50       | 15      |      | 15   | 180.17   |    |      |
| 327 | 1.125718  | 125.375 | 130.5    | 50       |         | 60   |      | 90.08    |    |      |

|     |           |         |          |          |        |       |          |          |      |     |
|-----|-----------|---------|----------|----------|--------|-------|----------|----------|------|-----|
| 328 | 1.098566  | 175.75  | 87.5     |          |        | 117.5 |          |          |      |     |
| 329 | 1.621116  |         |          | 75       | 7.5    | 30    | 20       | 111.1033 |      |     |
| 330 | 1.820478  |         |          |          |        |       |          | 126.1167 |      |     |
| 331 | 1.2169    |         |          | 37.5     | 7.5    |       | 30       | 36.03    |      | 20  |
| 332 | 1.433999  |         | 52.4     | 50       | 15     |       | 20       | 97.09    |      | 25  |
| 333 | 1.287856  |         |          | 50       | 7.5    |       | 40       | 72.07    |      | 3   |
| 334 | 0.8382934 | 356.53  |          |          |        |       |          |          |      |     |
| 335 | 1.483879  |         | 107.5    | 60       | 15     |       | 35       | 80.07    |      |     |
| 336 | 1.177208  |         | 102.88   | 49       | 7.5    |       |          | 59.305   |      | 12  |
| 337 | 0.9690455 |         | 64.5     | 30       |        |       | 10       | 45.04    |      |     |
| 338 | 1.036193  |         | 72.96667 | 38.5     |        |       | 17.5     | 190.675  | 25.5 |     |
| 339 | 1.46557   |         | 52.5     | 100      | 37.5   |       | 80       | 73.57    | 30   |     |
| 340 | 1.340536  |         | 92.33334 |          | 33.75  |       | 30       | 192.18   |      |     |
| 341 | 1.323276  | 53.68   | 86       | 84       | 60     |       |          | 80.03378 |      |     |
| 342 | 0.9933661 |         | 75.25    | 50       |        |       | 35.83333 | 115.105  |      |     |
| 343 | 1.595849  | 713.06  | 322.5    | 100      | 60     |       |          | 160.15   |      |     |
| 344 | 1.331236  |         | 301      | 100      | 30     |       | 30       | 72.07    |      |     |
| 345 | 1.327834  |         | 26.2     | 50       |        |       | 22.5     | 108.1    |      |     |
| 346 | 1.022525  |         | 126.2    | 50       |        |       |          | 103.595  |      |     |
| 347 | 1.367877  |         | 93.88667 | 43.75    | 32.5   |       | 20       | 49.045   |      | 50  |
| 348 | 1.515476  |         | 85.2     | 50       | 28.125 |       |          | 90.08    |      | 50  |
| 349 | 1.06657   |         | 172      |          |        |       |          |          |      |     |
| 350 | 1.220465  | 1406.03 | 129      | 100      |        |       |          |          |      |     |
| 351 | 0.626325  |         | 86       |          |        |       |          | 494.858  |      |     |
| 352 | 1.223527  |         | 400      | 300      | 30     |       |          |          |      |     |
| 353 | 1.048817  |         | 29.38    | 55       |        |       | 30       | 94.8375  |      |     |
| 354 | 1.076535  |         | 86       |          |        |       |          | 75.07    |      |     |
| 355 | 1.460919  |         | 172      | 87.5     | 18.75  |       |          | 112.605  |      |     |
| 356 | 1.222863  |         | 86       | 50       | 12.5   |       |          | 158.65   |      |     |
| 357 | 1.285214  |         | 215      | 100      | 30     |       |          | 216.195  |      | 50  |
| 358 | 1.188518  |         | 172      | 50       |        |       |          | 109.6    |      |     |
| 359 | 1.458737  |         | 86       | 100      | 28.125 |       | 40       | 96.84    | 30   | 50  |
| 360 | 1.405775  |         | 86       | 100      | 30     |       | 40       | 122.1133 | 30   |     |
| 361 | 1.424247  |         | 96.75    | 100      | 60     |       | 30       | 132.575  | 22.5 | 50  |
| 362 | 1.813806  |         | 86       | 100      | 60     |       |          | 480.44   |      |     |
| 363 | 1.582548  |         | 86       | 50       | 15     |       |          | 107.502  |      |     |
| 364 | 1.352451  |         |          | 50       | 30     |       |          | 75.07    |      |     |
| 365 | 1.214808  |         | 52.4     | 75       |        |       |          | 168.155  |      |     |
| 366 | 0.984234  | 1054.52 | 229.3333 |          |        |       |          | 150.14   |      | 150 |
| 367 | 1.250201  |         | 94.66666 | 41.66667 | 15     |       |          | 107.915  |      |     |
| 368 | 0.9124558 |         | 64.5     |          |        |       |          | 108.1    |      |     |

|     |           |         |          |          |          |        |      |          |    |      |
|-----|-----------|---------|----------|----------|----------|--------|------|----------|----|------|
| 369 | 0.7042356 |         | 86       |          |          |        |      | 560.515  |    |      |
| 370 | 1.308622  |         | 172      | 100      | 10       |        |      | 132.62   |    |      |
| 371 | 1.001114  |         | 29.48    |          |          |        |      | 144.13   |    |      |
| 372 | 1.356917  |         | 86       |          |          |        |      |          |    |      |
| 373 | 1.333311  |         | 43       | 50       | 15       |        |      | 96.09    |    | 8.33 |
| 374 | 0.9493632 |         | 86       | 50       |          |        |      | 216.11   |    |      |
| 375 | 1.17528   |         | 46.13334 | 75       |          |        |      | 139.38   |    |      |
| 376 | 0.7305636 |         | 64.5     |          |          |        |      | 90.085   |    |      |
| 377 | 1.042825  |         | 32.24    | 50       |          |        |      | 112.1033 |    |      |
| 378 | 1.294674  |         | 300      | 67.5     | 8.75     |        |      | 158.65   |    |      |
| 379 | 1.032765  |         | 65.6     | 100      |          |        |      | 214.8667 |    |      |
| 380 | 1.13539   | 1205.17 | 107.5    | 50       | 26.25    | 65     |      | 114.105  |    | 50   |
| 381 | 1.173388  | 149.96  | 86       | 66.66666 | 15       |        |      | 90.75333 | 30 |      |
| 382 | 1.608897  |         | 70.2     | 50       |          | 124.95 | 45   | 236.22   |    |      |
| 383 | 1.543042  |         | 48.1     | 50       |          | 74.98  | 25   | 95.08666 |    |      |
| 384 | 1.51346   |         |          | 50       |          | 120    |      | 50.05    |    |      |
| 385 | 0.9465188 |         |          | 48       | 7.5      |        | 62.5 | 128.4333 |    |      |
| 386 | 1.419647  |         | 70       | 50       | 15       |        |      | 240.225  | 80 |      |
| 387 | 1.28176   |         | 129      |          |          |        |      |          |    |      |
| 388 | 1.596246  |         | 139.75   | 100      | 20       |        |      | 142.635  |    |      |
| 389 | 1.212351  |         | 86       | 100      | 15       |        |      | 209.5267 |    |      |
| 390 | 1.154955  |         | 86       | 50       | 15       |        |      | 66.059   |    |      |
| 391 | 0.7904491 |         |          | 30       | 5.62     |        |      | 55.85333 |    |      |
| 392 | 1.315776  |         | 96.75    | 50       | 11.66667 |        |      | 146.135  |    |      |
| 393 | 1.271897  |         | 215      | 100      | 15       |        |      | 72.07    |    |      |
| 394 | 1.264725  |         | 72.48    |          |          |        |      | 101.595  |    |      |
| 395 | 1.084996  |         | 139.8    | 56.66667 |          |        | 15   | 192.18   | 17 |      |
| 396 | 1.313917  |         | 157.2    | 50       | 7.5      |        |      | 49.38    |    |      |
| 397 | 1.395898  |         | 43       | 50       | 8.75     |        |      | 63.06    |    |      |
| 398 | 1.131692  |         | 173.5    |          |          |        |      | 264.24   |    | 50   |
| 399 | 1.033266  |         | 129      | 37.5     |          |        |      | 72.07    |    |      |
| 400 | 1.325847  |         | 107.5    | 50       | 22.5     |        |      | 64.06    |    |      |
| 401 | 0.9530115 |         |          | 30       |          |        | 22.5 |          |    |      |
| 402 | 1.283314  |         | 140      | 65       | 10       |        | 20   |          | 40 |      |
| 403 | 1.303173  |         | 172      |          |          |        |      |          |    |      |
| 404 | 1.419543  |         |          | 50       | 22.5     |        |      |          | 62 |      |
| 405 | 0.8406181 |         |          | 50       |          |        | 40   |          | 15 |      |
| 406 | 1.385527  |         | 26.2     | 50       |          | 30     | 30   | 107.1    | 15 |      |
| 407 | 1.343822  |         |          |          | 7.5      |        |      | 81.07666 |    | 45   |
| 408 | 1.392442  |         | 172      | 100      |          | 180    |      | 288.265  |    |      |
| 409 | 1.574932  |         | 86       | 50       | 7.5      | 60     |      | 25.02    |    |      |

|     |           |        |          |          |       |      |          |          |  |    |
|-----|-----------|--------|----------|----------|-------|------|----------|----------|--|----|
| 410 | 1.258858  |        | 271.25   | 100      |       |      | 100      | 122.615  |  |    |
| 411 | 0.8383901 |        | 43       | 50       |       |      | 20       | 72.065   |  |    |
| 412 | 1.104575  |        | 215      | 50       | 7.5   |      |          |          |  |    |
| 413 | 1.393374  |        | 86       | 50       | 22.5  |      |          | 73.07    |  |    |
| 414 | 1.393374  |        | 86       | 50       | 22.5  |      |          | 73.07    |  |    |
| 415 | 0.9358857 |        |          | 50.41667 | 20    |      |          | 169.655  |  | 50 |
| 416 | 1.124259  | 351.51 | 258      | 50       |       |      |          | 73.57    |  | 50 |
| 417 | 1.247395  | 527.26 | 86       | 100      | 30    |      |          | 75.07    |  |    |
| 418 | 1.188432  |        |          | 20       |       |      |          |          |  |    |
| 419 | 1.487945  | 351.51 |          | 70       |       |      | 20       | 192.18   |  |    |
| 420 | 1.09701   |        | 64.5     | 50       | 7.5   |      |          | 224.21   |  |    |
| 421 | 1.02884   |        | 86       | 50       | 15    |      |          | 78.075   |  |    |
| 422 | 1.038441  |        | 129      |          |       |      |          | 96.09    |  |    |
| 423 | 1.242793  |        | 43       |          |       | 50.5 |          | 122.11   |  |    |
| 424 | 0.8979577 |        |          | 20       | 15    |      |          | 50.05    |  |    |
| 425 | 1.222434  |        | 90.66666 | 50       |       |      |          | 45.04    |  |    |
| 426 | 1.216459  |        | 107.5    | 50       | 12.19 |      |          | 90.085   |  |    |
| 427 | 1.316573  |        | 86       | 66.66666 | 7.5   |      | 41.33333 | 216.2    |  |    |
| 428 | 1.489041  |        |          | 25       |       | 180  |          |          |  |    |
| 429 | 1.11243   |        |          | 27       | 7.5   | 30   |          | 144.135  |  |    |
| 430 | 1.473477  |        | 65.6     | 150      | 25    | 238  |          | 116.9433 |  |    |
| 431 | 0.9931661 |        | 100.3333 | 50       | 7.5   |      |          | 696.645  |  |    |
| 432 | 1.237744  |        |          | 50       |       | 100  |          | 85.575   |  |    |
| 433 | 0.9569188 |        | 43       | 50       | 5     |      |          | 125.12   |  |    |
| 434 | 1.204624  |        |          | 75       | 8     |      |          | 232.22   |  |    |
| 435 | 1.209043  |        | 215      |          |       | 60   |          | 96.09    |  |    |
| 436 | 1.510246  |        | 75.64    |          |       |      |          | 108.1    |  |    |
| 437 | 1.133853  |        | 136.1667 | 50       | 15    |      |          | 85.58    |  |    |
| 438 | 1.017239  | 351.51 | 225.75   | 50       | 26.25 |      |          | 240.22   |  |    |
| 439 | 1.307867  |        | 52.4     | 50       | 30    |      |          | 125      |  |    |
| 440 | 1.309845  |        |          |          |       |      |          | 120.11   |  |    |
| 441 | 1.076404  |        | 107.5    | 75       |       |      |          | 190.1767 |  |    |
| 442 | 1.210029  |        | 107.5    | 50       |       |      |          | 84.08    |  |    |
| 443 | 1.133717  |        | 215      | 50       |       |      |          |          |  |    |
| 444 | 1.325862  |        | 236.5    | 75       | 28.25 |      |          | 226.8733 |  |    |
| 445 | 1.425376  |        | 172      | 50       | 15    |      |          | 240.22   |  |    |
| 446 | 1.676197  | 401.72 | 107.5    | 50       |       |      |          | 96       |  |    |
| 447 | 1.322926  | 200.86 | 86       |          |       |      |          | 96.09    |  |    |
| 448 | 1.111052  |        | 258      |          |       |      |          | 120.11   |  |    |
| 449 | 1.165119  |        | 107.5    | 50       | 7.5   | 50   |          | 45.04    |  |    |
| 450 | 1.103262  |        | 41.15    | 54       | 15    |      |          | 175.16   |  | 25 |

|     |           |         |          |          |       |     |      |          |    |    |
|-----|-----------|---------|----------|----------|-------|-----|------|----------|----|----|
| 451 | 1.226371  |         | 107.5    |          |       |     |      | 67.56    |    |    |
| 452 | 1.482647  |         | 107.5    | 50       | 16    |     |      | 45.04    |    |    |
| 453 | 1.507403  |         | 32.76    | 75       | 10    |     | 40   | 85.58    |    |    |
| 454 | 1.321989  |         | 131.25   | 100      |       |     |      | 72.07    |    |    |
| 455 | 1.211527  |         | 172      | 50       |       | 100 |      | 144.13   |    |    |
| 456 | 1.273857  |         | 172      |          |       |     |      |          |    |    |
| 457 | 1.288611  |         | 172      | 50       | 7.5   |     |      | 109.6    |    |    |
| 458 | 1.061743  |         | 86       | 50       |       |     |      | 108.1    |    | 50 |
| 459 | 1.482974  |         |          | 50       | 22.5  |     |      | 75.07    |    |    |
| 460 | 0.8815334 |         | 100.44   |          |       |     |      |          |    |    |
| 461 | 1.322002  |         |          |          |       | 60  | 24.2 |          |    |    |
| 462 | 1.119863  | 298.25  |          |          |       | 100 | 17.6 |          |    |    |
| 463 | 0.905354  |         | 135.13   | 30       | 15    |     |      | 123.8675 |    |    |
| 464 | 0.9983516 | 1807.75 | 129      |          |       |     |      | 125.12   |    |    |
| 465 | 1.153678  |         | 86       |          |       |     |      | 96.09    |    |    |
| 466 | 0.7226501 |         |          | 37.5     |       |     |      | 192.68   |    |    |
| 467 | 0.8336887 |         | 226.2    | 50       |       |     |      | 192.1767 |    |    |
| 468 | 0.770723  | 703.01  | 172      | 110      |       |     |      | 200.1833 |    | 65 |
| 469 | 1.14783   |         | 172      | 110      | 7.5   |     |      | 96.09    |    |    |
| 470 | 1.380596  |         | 89       | 62.5     | 9.375 | 120 |      | 86.3325  |    |    |
| 471 | 0.8632726 |         | 86       | 150      |       |     |      | 72.07    | 30 |    |
| 472 | 0.894217  |         |          | 25       | 15    |     |      | 169.49   |    |    |
| 473 | 1.659277  |         | 157.5    | 50       | 19    | 30  | 40   | 33.33333 |    |    |
| 474 | 1.279563  |         | 114.6667 | 84.66666 | 22.5  | 120 |      | 250.8967 |    |    |
| 475 | 0.8932084 |         | 42.6     | 30.25    |       | 60  |      | 480.44   |    |    |
| 476 | 1.348117  |         | 52.4     | 25       | 6.02  |     |      | 126.66   |    |    |
| 477 | 0.9520743 |         | 86       |          |       |     |      | 50.05    |    |    |
| 478 | 0.7806746 |         |          | 25       |       |     | 0.35 | 392.8625 |    |    |
| 479 | 0.9608657 |         | 43       | 50       | 15    |     |      | 176.1633 |    |    |
| 480 | 1.714382  |         | 107.5    | 100      | 30    |     |      | 100.09   |    |    |
| 481 | 1.929726  |         |          | 120      | 7.5   | 200 | 15   | 45.04    |    |    |
| 482 | 1.646588  |         | 107.5    | 100      | 30    |     |      | 25.02    |    |    |
| 483 | 1.539426  |         | 172      |          |       |     | 40   | 45.04    | 30 |    |
| 484 | 1.406431  |         | 160.5    | 150      | 22.5  |     |      | 125.12   |    | 45 |
| 485 | 0.9773588 |         | 105      | 50       | 15    |     |      | 112.77   |    |    |
| 486 | 1.409037  | 23.5    | 86       | 43.75    | 22.5  |     | 15   | 125.12   |    |    |
| 487 | 1.054584  |         | 113      | 47.5     | 50    |     | 20   | 207.19   |    |    |
| 488 | 1.258253  |         |          |          |       |     |      | 50.05    |    |    |
| 489 | 1.39543   |         | 75.25    | 50       |       |     | 120  | 82.58    |    |    |
| 490 | 1.256824  |         | 78.6     | 50       |       |     |      | 130.12   |    |    |
| 491 | 1.280522  |         | 52.4     | 100      | 15    |     |      | 98.09    |    |    |

|     |           |          |          |          |          |    |          |          |    |     |
|-----|-----------|----------|----------|----------|----------|----|----------|----------|----|-----|
| 492 | 0.9759643 | 492.1767 | 175      |          |          |    |          | 144.13   |    |     |
| 493 | 2.119406  |          | 129      |          |          |    | 20       |          |    |     |
| 494 | 1.63146   |          |          | 50       | 111.25   |    |          | 207.1933 |    |     |
| 495 | 1.026602  | 821.54   |          | 50       |          |    |          |          |    |     |
| 496 | 1.095653  |          | 65.5     | 20       |          |    |          | 64.50333 |    |     |
| 497 | 1.213944  |          | 105      | 50       |          |    |          | 100.09   |    |     |
| 498 | 1.558846  |          | 86       | 50       | 15       |    |          | 160.15   |    |     |
| 499 | 1.089179  |          | 74.39    | 100      | 15       |    |          | 120.11   |    |     |
| 500 | 0.8876919 |          | 108.5    | 50       |          | 30 |          | 75.07    |    |     |
| 501 | 1.480759  |          | 129      | 50       | 22.5     |    |          | 75.07    |    | 50  |
| 502 | 1.124962  |          | 215      | 50       | 30       |    |          | 74.07    |    |     |
| 503 | 1.2555    | 43.46667 |          | 50       | 30       |    |          | 122.1133 |    | 70  |
| 504 | 1.054795  |          |          | 50       | 15       |    |          | 377.6833 |    | 75  |
| 505 | 1.303216  |          |          | 150      |          |    |          | 249.23   |    |     |
| 506 | 0.9470091 | 703.01   |          | 60       | 7.5      |    | 32       | 192.18   | 34 |     |
| 507 | 1.181713  |          | 39.3     | 54       |          |    |          | 72.07    |    |     |
| 508 | 0.9400153 |          | 52.4     |          |          |    |          | 80.07    |    |     |
| 509 | 1.344871  | 144.62   |          | 30       |          |    | 60       | 45.04    |    |     |
| 510 | 1.359052  |          | 43       | 70       |          |    |          | 133.625  |    | 100 |
| 511 | 1.024596  |          |          | 25       | 7.5      |    |          | 120.11   |    |     |
| 512 | 1.063588  |          | 50.77    | 35.66667 | 15       |    |          | 179.5033 |    |     |
| 513 | 0.9946227 |          |          | 45       |          |    | 30       | 192.18   |    |     |
| 514 | 1.119636  |          | 82.3     | 30       | 7.5      |    |          | 118.61   |    |     |
| 515 | 1.266976  |          |          | 16.6     | 3.2      |    |          |          |    |     |
| 516 | 1.451824  |          | 200      |          | 25       | 30 |          | 33.33333 |    |     |
| 517 | 0.8028865 |          | 52.4     | 30       |          |    | 70       | 33.33333 |    |     |
| 518 | 1.70485   |          | 104.8    | 50       | 12.66667 |    |          | 119.61   |    |     |
| 519 | 0.7850365 |          |          |          |          |    | 90       | 166.65   |    |     |
| 520 | 0.9381179 |          | 26.2     | 45       | 7.5      |    | 80       | 576.53   |    |     |
| 521 | 1.274121  |          | 26.2     |          | 7.5      |    |          | 100.09   |    | 50  |
| 522 | 1.071382  |          | 205.6    | 50       | 15       |    |          | 126.615  |    |     |
| 523 | 1.111913  |          | 64.5     | 50       |          |    | 20       | 128.12   |    |     |
| 524 | 1.087222  | 351.51   | 64.5     | 50       | 15       |    | 33.33333 | 1226.107 |    |     |
| 525 | 1.009523  |          | 66.29333 |          |          | 30 |          | 72.07    |    | 50  |
| 526 | 0.8842042 |          |          | 50       | 22.5     |    |          |          |    |     |
| 527 | 1.304146  |          | 179.13   | 100      | 30       |    |          | 121.11   |    |     |
| 528 | 1.197613  |          | 236.5    |          |          |    |          | 192.18   |    |     |
| 529 | 1.160729  |          |          | 49.33333 | 12       |    | 45       | 74.07    | 15 |     |
| 530 | 1.376411  |          | 64.5     | 50       | 10       |    | 8        | 76.07    |    |     |
| 531 | 1.088371  |          | 130.7933 |          |          |    |          | 90.0825  |    | 50  |
| 532 | 1.18299   |          | 84.20667 | 36.66667 | 7.5      |    | 15       | 67.56    |    | 50  |

|     |           |       |          |          |        |       |          |          |      |      |
|-----|-----------|-------|----------|----------|--------|-------|----------|----------|------|------|
| 533 | 1.177613  |       | 32.26    | 37.5     |        |       | 20       | 96.09    |      |      |
| 534 | 1.833056  |       |          | 50       | 15     |       |          | 82.57    |      |      |
| 535 | 1.183832  |       | 624      | 50       |        |       |          | 40.04    |      |      |
| 536 | 1.174567  |       | 55.68    | 31.25    | 13.125 |       | 22.5     | 70.06667 | 22.5 | 100  |
| 537 | 1.12772   |       | 49.18    | 41.66667 | 12.5   |       |          | 97.59    |      |      |
| 538 | 0.925458  |       | 58.96    | 27.5     | 15     |       |          | 77.32    |      |      |
| 539 | 1.230176  | 94.01 | 92       | 42.5     | 7.5    |       | 45       | 96.09    |      | 15   |
| 540 | 0.6061076 |       |          |          |        |       |          | 80.07    |      | 50   |
| 541 | 0.8198444 |       | 78.6     | 50       |        | 120   | 22.5     | 104.0967 |      |      |
| 542 | 1.338791  |       |          | 60       | 22.5   |       | 40       | 35.55556 |      |      |
| 543 | 1.119429  |       |          | 56.66667 |        |       | 24.375   | 48.98963 |      |      |
| 544 | 1.297043  |       |          | 83.33334 | 22.5   |       |          | 96.09    |      |      |
| 545 | 1.41153   |       |          | 37.5     | 15     |       |          | 157.1433 |      |      |
| 546 | 1.509329  |       |          |          |        |       |          | 45.04    |      |      |
| 547 | 1.326574  |       |          | 75       | 20.625 |       |          | 130.1175 |      |      |
| 548 | 1.043374  |       | 71.55    | 62.5     | 7.5    |       | 25       | 76.07    |      |      |
| 549 | 1.232834  |       | 120.0867 | 50       |        |       | 40       | 326.7    |      |      |
| 550 | 1.450083  |       | 78.6     |          |        |       |          | 240.22   |      |      |
| 551 | 1.160867  |       | 35.96    | 50       | 7.5    |       | 20       | 90.08    |      |      |
| 552 | 1.029125  |       | 83.06667 | 62.5     | 20.625 | 64    |          | 116.666  |      | 45   |
| 553 | 1.225879  |       |          | 50       | 15     | 60    | 30       | 120.11   | 30   |      |
| 554 | 1.052891  |       |          | 50       | 10     | 73.92 | 35       | 167.155  |      |      |
| 555 | 1.095497  |       | 107.5    | 50       |        |       | 90       | 288.27   | 68   |      |
| 556 | 1.203416  |       | 64.5     | 50       | 11.25  |       | 30       |          | 25.5 |      |
| 557 | 1.003777  |       |          | 50       |        |       | 90       | 160.15   | 34   |      |
| 558 | 1.073329  |       | 114.62   | 30       |        |       |          | 175.16   |      |      |
| 559 | 1.046932  |       | 98.3     | 30       |        |       |          | 136.125  |      |      |
| 560 | 1.315291  |       | 132.5    | 60       | 24.5   | 30    | 40       | 112.7567 |      |      |
| 561 | 1.579311  |       | 52.4     | 50       |        | 100   | 52.5     | 63.3075  |      | 55   |
| 562 | 1.431325  |       | 86       |          |        |       |          |          |      |      |
| 563 | 1.326689  |       | 86       | 75       |        |       | 30       |          | 30   |      |
| 564 | 1.486489  |       | 229.3333 | 100      | 15     |       |          | 112.605  |      | 50   |
| 565 | 1.03243   |       |          | 50       | 7.5    |       |          | 80.07    |      |      |
| 566 | 1.180666  |       | 86       | 110      | 7.5    |       | 80       | 105.0933 |      |      |
| 567 | 1.111431  |       |          | 50       | 7.5    |       |          | 256.24   |      |      |
| 568 | 1.242218  |       | 78.6     | 50       |        |       | 15       | 134.625  |      |      |
| 569 | 1.038517  |       | 58.06667 |          |        |       | 23.33333 | 16.14815 |      | 37.5 |
| 570 | 1.408018  |       | 86       | 50       |        |       | 22.5     | 123.7161 |      |      |
| 571 | 1.117066  |       | 65.6     | 24       | 17.5   | 100   |          | 105.5415 |      |      |
| 572 | 0.930823  |       |          | 33.33333 | 7.5    |       | 10       | 113.4367 | 7.5  | 25   |
| 573 | 1.368418  |       | 75.25    | 62.5     | 37.5   |       |          | 90.08    | 35   |      |

|     |           |         |          |          |        |     |          |          |     |      |
|-----|-----------|---------|----------|----------|--------|-----|----------|----------|-----|------|
| 574 | 2.108812  |         | 78.6     | 50       | 45     |     | 7.5      | 12.01    |     |      |
| 575 | 1.039998  |         |          |          |        |     |          | 37.53    |     |      |
| 576 | 1.048307  |         | 75.8     | 37.5     | 26.25  |     |          | 74.068   |     |      |
| 577 | 1.422716  |         | 52.4     |          | 15     |     |          | 181.53   |     |      |
| 578 | 1.228572  |         | 52.4     | 40       |        |     |          | 93.8375  |     | 65   |
| 579 | 1.253208  |         | 86       | 56.66667 | 10.5   | 60  | 20       | 97.59    |     |      |
| 580 | 1.266359  |         | 127.3333 | 50       | 7.5    |     | 40       | 81.07333 |     |      |
| 581 | 0.9879154 |         | 78.66666 | 50       | 10     | 60  |          | 143.385  |     |      |
| 582 | 1.053698  | 496.125 | 96.75    | 100      | 6      |     | 17.5     | 96.09    | 15  |      |
| 583 | 1.236749  |         | 54.25    | 47.5     | 19     |     | 20       | 128.12   |     |      |
| 584 | 1.017367  |         | 65.6     | 30       | 7.5    |     |          | 250.23   |     |      |
| 585 | 0.9062844 |         | 147.38   |          |        |     |          | 70.565   |     |      |
| 586 | 0.9116347 |         | 58.96    | 50       | 15     | 60  | 36.25    | 153.8925 | 10  |      |
| 587 | 1.202993  |         | 344      | 100      | 7.5    |     |          | 73.07    |     |      |
| 588 | 1.614551  |         |          | 50       | 7.5    |     |          | 96.09    |     |      |
| 589 | 1.10259   |         | 43       | 200      |        |     | 18       |          | 10  |      |
| 590 | 1.201492  |         | 196.5    | 50       | 15     |     | 30       | 100.09   | 45  |      |
| 591 | 1.346484  |         | 67.19    | 37.5     | 7.5    |     | 40       |          |     | 50   |
| 592 | 0.9909623 |         |          | 25       |        |     | 30       |          |     |      |
| 593 | 1.202995  |         | 118.25   | 53.5     | 4      | 30  |          | 88.08334 |     |      |
| 594 | 1.237245  | 149.12  |          | 25       | 7.5    |     | 60       | 100.4267 |     | 12.5 |
| 595 | 1.213253  | 150     | 64.5     | 66.66666 | 45     |     |          | 100.09   | 100 |      |
| 596 | 1.209864  |         |          | 75       | 7.5    |     | 30       |          |     |      |
| 597 | 1.501179  |         | 107.5    |          |        | 60  |          | 120.11   |     | 22.5 |
| 598 | 1.157188  |         | 87.5     | 52.5     |        |     |          | 120.11   |     |      |
| 599 | 1.158952  |         | 48.38    | 20       |        |     | 15       | 120.11   |     | 65   |
| 600 | 1.152418  |         |          | 100      |        |     |          | 65.06    |     |      |
| 601 | 0.9305218 | 351.51  |          | 95       |        |     | 53.33333 | 205.0457 |     |      |
| 602 | 1.447404  |         |          |          |        | 160 |          | 100.09   |     |      |
| 603 | 1.371645  |         |          | 100      |        |     |          | 72.07    |     |      |
| 604 | 1.513649  |         | 32.26    | 50       |        |     |          | 45.04    |     |      |
| 605 | 1.560512  |         | 43       |          |        |     |          | 96.09    |     |      |
| 606 | 1.511549  |         | 215      | 66.66666 | 22.5   |     | 29.5     | 144.13   | 30  |      |
| 607 | 1.234232  |         | 107.5    | 50       | 30     |     |          | 80.075   |     |      |
| 608 | 1.334751  |         | 107.5    | 50       |        |     | 80       | 82.575   |     |      |
| 609 | 1.713725  |         | 215      |          |        |     |          |          |     |      |
| 610 | 1.2831    |         |          | 50       |        | 60  | 7.5      |          |     |      |
| 611 | 1.296331  |         | 42       | 50       |        |     |          | 25.11111 |     |      |
| 612 | 1.313589  |         | 86       | 50       |        |     | 90       |          |     |      |
| 613 | 1.200572  | 241.035 | 350      | 37.5     | 13.125 |     | 23.33333 | 192.18   | 20  |      |
| 614 | 1.642441  |         | 86       | 50       | 15     |     |          | 141.13   |     |      |



|     |           |          |          |          |        |        |       |          |        |     |
|-----|-----------|----------|----------|----------|--------|--------|-------|----------|--------|-----|
| 615 | 1.186086  |          | 26.2     |          |        | 65     | 16.13 | 123.1125 |        |     |
| 616 | 1.019989  | 2586.085 | 129      | 50       | 38     |        |       | 108.1    |        | 50  |
| 617 | 1.203727  | 250.315  |          | 50       |        |        |       | 192.18   |        | 50  |
| 618 | 1.070799  |          |          | 30       |        |        |       | 192.18   |        | 50  |
| 619 | 1.164812  | 410.09   | 107.5    | 100      | 15     |        |       | 46.295   | 30     |     |
| 620 | 0.9393601 |          | 64.5     | 60       |        |        | 15    | 50.71333 |        |     |
| 621 | 1.522314  |          | 86       | 73.33334 | 15     |        | 120   |          | 27     |     |
| 622 | 1.244972  |          |          | 57.33333 | 7.5    |        | 30    | 192.18   | 11     |     |
| 623 | 1.156704  |          |          | 43.5     |        | 52.875 | 27.5  |          | 20.625 |     |
| 624 | 0.9585072 |          | 64.5     | 30       | 7.5    |        | 24    | 163.35   |        |     |
| 625 | 0.9888541 |          | 104.8    |          |        |        |       | 126.115  |        |     |
| 626 | 1.323443  |          | 91.70667 | 120      |        | 100    |       |          |        |     |
| 627 | 1.119064  |          | 86       | 50       |        |        | 15    | 60.06    |        |     |
| 628 | 1.084249  |          | 43       | 50       | 15     |        |       | 125.12   |        |     |
| 629 | 1.51402   |          | 129      | 50       |        |        | 52.5  | 71.73334 |        |     |
| 630 | 1.194197  |          | 75.25    | 75       |        |        | 45    | 127.1167 |        |     |
| 631 | 1.109744  |          | 101      | 50       | 22.5   |        |       | 118.61   |        |     |
| 632 | 1.003698  |          | 143.44   |          |        |        | 20    | 92.085   |        | 50  |
| 633 | 0.9165771 |          | 43       | 60       |        |        | 90    | 90.08    | 30     |     |
| 634 | 1.436354  |          |          | 170      |        |        |       |          |        |     |
| 635 | 1.228647  |          | 96.75    | 50       | 8      |        |       | 145.635  |        | 100 |
| 636 | 1.296725  |          |          | 60       |        |        | 30    | 192.18   | 11.25  |     |
| 637 | 1.329313  |          |          | 50       | 10     | 80     |       | 178.1667 |        |     |
| 638 | 1.468913  |          | 52.4     | 62.5     | 18.875 | 60     | 80    | 84.08    |        | 50  |
| 639 | 1.462748  |          | 65.23333 | 50       | 17     |        | 72    | 64.055   |        |     |
| 640 | 1.02875   |          |          | 50       | 32     |        | 20    | 288.27   |        |     |
| 641 | 1.186792  | 149.12   |          | 137.5    |        | 90     |       | 123.365  |        |     |
| 642 | 1.113646  |          |          | 46.66667 | 11.25  | 180    |       | 181.1675 |        |     |
| 643 | 1.1407    | 1230.275 |          | 51.66667 |        |        | 15    | 60.06    | 34     |     |
| 644 | 1.354265  |          | 86       | 50       | 15     |        |       | 72.07    |        |     |
| 645 | 1.081778  |          | 64.83334 | 50       | 7.5    |        |       | 54.8     |        |     |
| 646 | 1.257712  |          | 215      | 125      |        |        | 60    |          |        |     |
| 647 | 1.292324  |          | 129      | 70       | 17     |        | 8     | 192.18   |        |     |
| 648 | 1.583172  |          | 86       | 50       | 22.5   | 60     |       | 75.44    |        |     |
| 649 | 1.331823  |          | 172      | 75       | 22.5   |        |       | 89.75333 |        |     |
| 650 | 1.190255  |          | 43       | 100      |        |        |       | 360.33   |        | 100 |
| 651 | 1.135131  |          | 26.2     | 50       |        |        | 15    | 160.14   |        | 50  |
| 652 | 1.854972  |          | 64.5     | 50       | 30     |        |       | 75.07    |        |     |
| 653 | 1.384374  |          | 129      | 100      |        |        |       | 96.09    | 30     |     |
| 654 | 1.438041  |          | 172      | 100      | 15     |        |       | 40.535   |        |     |
| 655 | 1.26541   |          | 201.25   | 50       |        |        |       | 45.04    |        |     |

|     |           |         |          |          |       |    |      |          |     |     |
|-----|-----------|---------|----------|----------|-------|----|------|----------|-----|-----|
| 656 | 1.1431    | 703.01  |          | 50       | 15    |    | 30   | 216.2    |     |     |
| 657 | 0.9911613 |         |          | 30       |       |    | 20   |          |     | 50  |
| 658 | 1.145803  |         |          | 42.5625  | 7.5   |    |      | 93.42333 |     |     |
| 659 | 1.141909  |         | 172      | 45       |       | 30 |      | 82.825   |     |     |
| 660 | 1.237071  |         | 86       | 50       |       |    |      | 96.09    |     |     |
| 661 | 1.719977  |         | 43       | 50       |       |    |      | 100.09   |     |     |
| 662 | 1.057086  |         | 129      | 60       |       |    | 45   | 96.09    |     |     |
| 663 | 1.224327  |         | 129      | 41.66667 | 25    |    | 60   | 129.4533 |     | 100 |
| 664 | 0.7494786 |         |          | 37.5     |       |    | 30   | 72.065   | 15  |     |
| 665 | 1.092613  |         | 86       | 50       | 7.5   |    |      | 70.565   |     |     |
| 666 | 1.101616  |         | 43       | 50       | 7.5   |    |      | 141.13   |     |     |
| 667 | 0.9061357 |         | 173      | 50       |       |    | 52.5 | 96.09    |     |     |
| 668 | 0.9332009 |         | 82.915   | 50       | 11.25 |    |      | 96.09    |     |     |
| 669 | 1.194444  |         | 49.55333 | 37.5     | 7.5   |    |      | 81.325   |     |     |
| 670 | 1.202452  |         | 86       | 50       |       |    |      | 60.06    |     |     |
| 671 | 0.9111301 |         | 344      | 100      |       |    | 50   | 333.6133 |     |     |
| 672 | 1.323935  |         |          |          |       |    |      |          |     |     |
| 673 | 1.618496  |         |          |          |       |    |      |          |     |     |
| 674 | 1.284845  |         | 96.25    |          |       |    |      | 37.53    |     |     |
| 675 | 0.8848614 |         |          |          |       |    |      | 122.12   |     |     |
| 676 | 0.8798922 | 1406.03 | 200      | 27       |       |    |      | 80.07    |     |     |
| 677 | 1.152506  |         | 34.6     | 75       | 9.5   |    | 30   | 130.555  |     | 100 |
| 678 | 1.072881  |         |          | 25       | 19    |    |      | 72.07    |     |     |
| 679 | 0.7351514 |         |          |          |       |    | 30   | 33.33333 |     |     |
| 680 | 1.124806  |         | 32.26    | 108      | 15    |    | 75   | 310.785  | 30  |     |
| 681 | 1.261203  |         | 129      |          |       |    |      | 75.07    |     |     |
| 682 | 1.498476  | 94.01   | 80.625   |          |       |    |      | 56.3     |     |     |
| 683 | 1.094307  |         | 32.53    | 60       |       |    |      | 141.8825 |     |     |
| 684 | 1.396973  |         | 193.5    | 50       | 15    |    |      | 64.06    |     |     |
| 685 | 1.773058  |         | 193.5    | 50       | 22.5  |    |      | 96.09    |     |     |
| 686 | 1.463683  |         | 64.5     | 50       | 15    | 60 |      | 128.12   |     |     |
| 687 | 0.795462  |         | 42.65    |          | 18    |    |      | 44.54    |     |     |
| 688 | 1.05646   |         | 39.3     | 100      |       |    |      | 127.6733 |     |     |
| 689 | 1.084857  |         | 52.5     | 75       |       |    | 30   |          |     |     |
| 690 | 1.267776  | 372.81  | 48.37    | 50       |       |    | 37.5 | 80.075   |     |     |
| 691 | 1.166564  |         | 86.25    | 50       |       |    | 25   | 93.085   |     |     |
| 692 | 0.9519647 |         | 150      |          |       |    | 20   | 101.595  |     |     |
| 693 | 0.8540802 |         | 64.5     | 30       |       |    | 20   | 96.09    |     |     |
| 694 | 1.059061  |         |          | 45.5     | 10    |    | 5    | 98.09333 | 100 |     |
| 695 | 1.068274  |         |          | 43.33333 | 15    |    | 40   | 195.782  | 120 |     |
| 696 | 1.237801  |         | 140      | 50       | 75    |    |      | 125.12   |     |     |

|     |           |          |          |          |       |     |          |          |    |     |
|-----|-----------|----------|----------|----------|-------|-----|----------|----------|----|-----|
| 697 | 1.144559  |          | 117.92   | 50       | 7.5   |     |          | 36.03    |    |     |
| 698 | 1.121264  |          | 73.19    | 50       | 7.5   |     |          | 181.0017 |    |     |
| 699 | 0.988102  |          | 65.6     |          |       |     |          |          |    |     |
| 700 | 1.149537  |          | 43       | 50       | 12.5  |     |          | 222.205  |    |     |
| 701 | 1.173889  |          | 98.26    | 26.66667 |       |     |          | 36.03    |    |     |
| 702 | 1.152214  |          | 26.26    | 30       | 7.5   |     |          |          |    |     |
| 703 | 1.63677   |          | 52.4     |          |       |     |          |          |    | 200 |
| 704 | 0.8841637 |          | 65.6     | 37.5     |       |     | 32.5     |          |    |     |
| 705 | 0.8339794 |          | 32.76    | 30       | 5     |     | 23.33333 | 25.41037 |    |     |
| 706 | 1.45328   |          |          | 50       |       |     |          | 36.03    |    |     |
| 707 | 1.092717  |          | 86       | 100      | 35    |     | 21       | 263.58   |    |     |
| 708 | 1.357528  |          |          | 75       | 15    |     |          | 62.05667 |    |     |
| 709 | 1.199226  |          |          | 50       | 7.5   | 60  |          | 253.73   |    |     |
| 710 | 1.39715   |          | 52.5     | 25       | 7.5   |     |          | 144.13   |    |     |
| 711 | 1.153135  |          | 107.5    | 50       |       |     | 20       | 64.06    | 15 |     |
| 712 | 1.791108  |          | 74.23334 |          | 37.5  |     |          |          |    |     |
| 713 | 1.110049  |          | 28.6     | 135      | 15    |     |          | 125.12   |    |     |
| 714 | 1.194293  |          | 86       |          |       |     |          | 168.155  |    |     |
| 715 | 0.9377598 |          | 32.76    | 50       |       |     |          | 57.35333 |    |     |
| 716 | 1.126902  |          | 166.2    | 50       | 12.5  |     |          | 240.22   |    |     |
| 717 | 1.371362  |          | 86       | 75       | 22.5  |     |          | 132.12   |    |     |
| 718 | 1.401328  |          | 71.67    | 105      | 5     |     | 30       | 102.8425 |    |     |
| 719 | 0.951564  |          | 344      | 50       | 10    |     |          | 182.67   |    |     |
| 720 | 1.080801  |          | 42.58    | 25       | 7.5   | 30  |          | 56.05    |    |     |
| 721 | 1.239658  |          | 86       | 75       |       |     |          | 96.09    |    |     |
| 722 | 1.023118  |          | 96.75    |          |       | 120 |          | 85.58    |    |     |
| 723 | 1.293318  |          | 172      |          |       |     |          | 125.12   |    |     |
| 724 | 1.601827  |          | 93.16666 | 301.6667 | 26.25 |     | 20       | 105.4333 | 15 |     |
| 725 | 1.508513  |          | 172      | 200      |       |     |          | 150.14   |    |     |
| 726 | 1.130749  |          | 26.2     | 50       | 26.25 |     |          | 225.215  |    |     |
| 727 | 1.348143  |          | 43       | 70       |       |     |          |          |    |     |
| 728 | 1.174928  |          | 78.6     |          | 7.5   |     |          | 68.61667 |    |     |
| 729 | 0.9135064 |          | 48.38    | 27       |       |     | 20       | 96.09    |    |     |
| 730 | 1.01911   |          |          |          |       |     |          | 90.08    |    |     |
| 731 | 0.964394  | 232.3533 | 138.5    |          |       |     |          | 47.525   |    | 50  |
| 732 | 1.137873  |          | 215      | 125      |       |     |          | 215.2025 |    |     |
| 733 | 1.090262  |          | 86       | 50       |       |     | 50       | 93.835   |    |     |
| 734 | 1.005283  |          |          | 60       |       |     | 15       | 109.7667 |    |     |
| 735 | 1.449523  |          | 107.5    |          |       |     |          | 75.07    |    |     |
| 736 | 1.113277  | 200.455  | 98.26    |          | 18.75 |     |          | 73.57    |    |     |
| 737 | 1.425085  |          | 85.3     |          |       |     |          |          |    |     |

|     |           |         |          |       |       |     |      |          |      |     |
|-----|-----------|---------|----------|-------|-------|-----|------|----------|------|-----|
| 738 | 1.258729  |         | 131      | 55    | 15    |     |      |          |      |     |
| 739 | 1.290168  |         | 172      | 50    | 15    |     |      | 48.04    |      |     |
| 740 | 1.288224  |         | 72.1     | 75    | 40    |     |      | 77.0725  |      |     |
| 741 | 0.668746  |         | 107.5    | 27    |       |     |      |          |      |     |
| 742 | 0.7342175 |         | 64.5     | 54    |       |     | 40   | 168.155  |      |     |
| 743 | 0.8939685 |         | 76.66666 | 27.5  | 15    | 30  |      | 80.07    |      |     |
| 744 | 0.8417351 |         |          |       |       |     |      | 57.254   |      |     |
| 745 | 1.241554  |         | 31.94    | 50    |       |     | 11.5 | 44.44444 |      |     |
| 746 | 0.9701326 |         | 79.95    | 50    | 11.25 |     | 40   | 273.252  |      |     |
| 747 | 1.036616  |         | 107.5    | 150   |       |     | 30   |          | 22.5 |     |
| 748 | 1.232633  |         | 164.8333 | 90    | 22.5  |     |      | 45.04    |      | 45  |
| 749 | 1.368556  |         | 43       | 60    | 15    |     |      | 132.12   |      | 50  |
| 750 | 1.141203  | 351.51  |          | 64.95 | 7.5   |     | 40   | 101.4267 |      |     |
| 751 | 1.091292  |         |          |       |       |     |      |          |      |     |
| 752 | 1.230527  |         | 107.5    | 50    |       |     | 20   | 96.09    | 30   |     |
| 753 | 1.042551  | 451.935 |          | 35    | 7.5   |     |      | 62.56    |      |     |
| 754 | 1.499523  |         | 172      |       |       | 30  |      | 125.12   |      |     |
| 755 | 1.032313  |         | 43       |       |       |     |      | 320.3    |      |     |
| 756 | 1.253663  |         | 86       | 50    | 30    |     |      | 219.2    |      |     |
| 757 | 1.461854  |         | 140      | 50    | 11.25 |     | 25   | 144.135  |      |     |
| 758 | 1.489912  |         | 107.5    | 50    |       |     | 180  | 100.09   |      |     |
| 759 | 1.071128  |         | 215      | 37.5  | 7.5   |     |      | 144.13   |      |     |
| 760 | 1.0438    |         | 215      | 62.5  | 11.25 |     | 25   | 192.1775 |      |     |
| 761 | 1.329783  |         | 43       | 50    | 22.5  | 238 |      | 62.56    |      |     |
| 762 | 1.104876  |         | 139.6    | 50    | 22.5  |     |      | 192.18   |      |     |
| 763 | 1.250926  |         | 86       | 175   |       |     | 60   | 52.54667 |      | 50  |
| 764 | 1.068023  | 351.51  | 52.4     | 72.5  | 11.25 | 60  |      | 56.305   | 15   |     |
| 765 | 1.203167  |         | 215      | 100   |       |     |      | 120.11   |      | 50  |
| 766 | 1.155658  |         | 107.5    | 50    |       |     |      | 120.11   |      | 50  |
| 767 | 1.355691  |         | 430      | 150   | 22.5  |     |      | 45.04    |      |     |
| 768 | 1.590515  |         |          | 50    | 7.5   |     | 20   | 100.09   | 15   |     |
| 769 | 0.9250496 |         | 43       |       |       |     |      |          |      |     |
| 770 | 1.05748   |         | 215      | 50    | 15    |     |      | 120.11   |      |     |
| 771 | 0.7612244 | 351.51  | 129      | 60    |       | 30  |      | 322.2983 |      | 100 |
| 772 | 1.104399  | 351.51  |          |       |       |     |      | 65.06    |      | 50  |
| 773 | 0.5927359 | 351.51  |          | 50    |       |     | 90   | 96.09    |      | 50  |
| 774 | 0.8168269 |         |          | 60    |       |     | 60   | 192.18   |      |     |
| 775 | 1.47295   |         | 86       | 100   |       |     | 80   | 75.07    |      |     |
| 776 | 0.9459221 | 1220.83 |          |       |       |     |      | 75.07    |      |     |
| 777 | 1.207554  | 144.62  |          | 125   | 15    |     | 7    | 82.07667 |      |     |
| 778 | 1.235483  |         | 43       | 75    | 7.5   | 60  |      | 57.555   |      |     |

|     |           |         |          |  |          |          |     |          |    |    |
|-----|-----------|---------|----------|--|----------|----------|-----|----------|----|----|
| 779 | 1.281058  |         | 107.5    |  |          | 100      |     | 144.13   |    |    |
| 780 | 1.504527  | 144.62  |          |  | 100      | 30       |     |          |    |    |
| 781 | 1.424298  |         |          |  |          |          |     | 120.11   |    | 45 |
| 782 | 1.305326  |         | 107.5    |  | 50       | 15       |     |          |    |    |
| 783 | 1.34732   |         | 75.25    |  | 50       | 15       |     | 75.07    |    |    |
| 784 | 1.112224  |         | 86       |  | 100      | 30       |     | 144.13   |    |    |
| 785 | 1.014241  |         | 215      |  |          |          |     |          |    |    |
| 786 | 0.9362178 |         | 107.5    |  | 50       | 15       |     | 96.09    |    |    |
| 787 | 1.101548  |         |          |  | 75       | 11.25    |     | 120.11   |    |    |
| 788 | 1.269661  | 143.16  | 86       |  | 75       | 5        |     | 85.58    |    |    |
| 789 | 0.9834469 |         |          |  |          |          |     |          |    |    |
| 790 | 0.9255002 | 2109.04 | 43       |  |          |          |     |          | 55 |    |
| 791 | 0.9053164 | 125.54  |          |  | 60       |          |     | 164.155  |    |    |
| 792 | 1.332246  |         | 140      |  |          | 15       |     | 75.07    | 20 |    |
| 793 | 1.469196  |         |          |  | 75       | 15       |     | 133.3333 |    |    |
| 794 | 1.071348  |         | 64.5     |  | 50       | 15       |     | 96.09    |    |    |
| 795 | 1.175194  |         | 86       |  | 50       | 13.83333 |     | 154.645  |    | 50 |
| 796 | 1.222489  |         | 39.3     |  | 50       | 16       |     | 98.09333 |    | 50 |
| 797 | 1.050301  |         | 26.2     |  | 66.66666 | 15       |     | 183.5    |    |    |
| 798 | 1.409062  |         |          |  | 55       | 15       |     |          | 90 |    |
| 799 | 1.088724  | 703.01  | 70       |  | 37.5     | 15       |     | 112.1867 |    |    |
| 800 | 1.025935  |         | 86       |  |          | 100      |     | 144.13   |    |    |
| 801 | 1.240467  |         | 64.5     |  | 77.5     |          |     | 98.595   |    | 50 |
| 802 | 1.024083  | 281.34  | 64.5     |  | 50       |          |     | 60.055   | 30 |    |
| 803 | 1.198503  |         | 86       |  | 50       | 7.5      |     | 64.16    | 25 | 50 |
| 804 | 1.549802  |         | 96.75    |  | 60       |          |     |          |    |    |
| 805 | 1.216056  |         | 59       |  | 50       | 15       |     | 103.095  |    |    |
| 806 | 1.10271   |         | 140      |  | 25       | 7.5      |     | 192.18   |    |    |
| 807 | 1.221727  |         | 53.76    |  |          |          |     | 45.04    |    |    |
| 808 | 1.277326  |         | 75.25    |  | 25       |          |     |          |    | 50 |
| 809 | 1.248074  |         | 68.25333 |  | 50       |          |     | 130.4533 |    |    |
| 810 | 0.9355541 |         |          |  | 30       |          |     | 240.225  | 45 |    |
| 811 | 1.335056  |         |          |  | 50       | 15       |     | 7.21     | 45 | 17 |
| 812 | 1.208137  |         | 73.33334 |  | 50       |          | 120 | 56.1125  | 30 |    |
| 813 | 1.046679  |         | 56.77333 |  | 31.25    |          | 30  | 73.565   | 15 |    |
| 814 | 1.319275  |         | 258      |  | 83.33334 | 27.5     |     | 123.11   | 60 | 50 |
| 815 | 1.125631  |         | 43       |  | 170      | 15       |     |          |    |    |
| 816 | 1.39312   |         | 32.76    |  |          | 17.5     | 90  | 56.055   | 15 |    |
| 817 | 1.090441  |         |          |  | 50       |          |     | 120.11   | 40 |    |
| 818 | 1.077736  |         |          |  |          |          |     | 96.09    |    |    |
| 819 | 1.078175  | 47      |          |  | 50       |          |     | 177.66   | 40 | 30 |

|     |           |         |         |          |          |    |          |          |     |      |
|-----|-----------|---------|---------|----------|----------|----|----------|----------|-----|------|
| 820 | 1.153242  | 703.01  |         | 36.66667 |          |    | 35.625   | 113.44   |     | 22.5 |
| 821 | 1.266412  |         |         | 61.66667 |          |    | 35.625   |          | 150 |      |
| 822 | 1.335412  |         |         | 53.33333 | 30       |    |          | 88.08    |     |      |
| 823 | 1.120719  |         |         | 30       |          |    |          | 100.76   | 90  |      |
| 824 | 1.148401  |         | 86      | 30       |          |    | 45       | 60.545   |     |      |
| 825 | 0.9387536 | 298.24  | 123.625 | 50       | 13.125   |    |          | 298.81   |     | 45   |
| 826 | 1.113771  |         | 71.25   |          |          | 30 | 20       | 56.74074 |     |      |
| 827 | 1.017184  |         |         | 50       |          |    | 100      | 120.11   |     | 22.5 |
| 828 | 1.321192  |         |         | 83.33334 | 18.75    |    |          | 202.19   |     |      |
| 829 | 1.250134  | 703.01  |         |          |          |    |          |          |     |      |
| 830 | 1.080925  |         |         | 75       | 11.25    |    |          | 120.1125 |     |      |
| 831 | 0.8866549 |         | 86      | 60       |          |    |          | 48.04    | 34  |      |
| 832 | 1.091461  |         |         | 25       |          |    |          |          |     |      |
| 833 | 0.8967681 | 1054.52 |         | 60       | 18.75    |    |          | 229.2133 |     |      |
| 834 | 1.278304  |         | 32.8    | 33.33333 |          | 30 | 60       | 126.7833 |     |      |
| 835 | 1.060555  |         | 103.9   | 50       |          |    | 60       | 198.1825 | 34  |      |
| 836 | 1.132568  | 351.51  | 172     | 25       | 7.5      | 30 |          | 48.04    | 15  |      |
| 837 | 1.266047  | 190.88  | 92.13   | 116.6667 | 24.37667 |    |          | 228.21   |     | 45   |
| 838 | 1.220117  |         | 46.5    | 55       | 7.5      |    |          | 72.07    |     |      |
| 839 | 1.138729  |         | 86      | 100      |          |    | 20       | 150.135  |     |      |
| 840 | 1.596402  |         | 201.565 | 75       | 22.5     |    |          | 100.09   |     |      |
| 841 | 1.227271  |         | 94.73   | 41.66667 | 7.5      |    | 20       | 90.75    |     |      |
| 842 | 1.019992  |         | 83.315  |          |          |    |          | 107.6    |     |      |
| 843 | 1.285213  |         |         |          |          |    |          | 180.17   |     |      |
| 844 | 1.026962  | 83.31   | 215     | 75       | 7.5      |    |          | 62.05667 |     |      |
| 845 | 1.202689  |         | 215     | 150      |          |    |          |          |     |      |
| 846 | 0.8972431 |         | 53.76   | 50       | 15       |    |          | 144.13   |     |      |
| 847 | 0.9295455 | 149.12  | 75.25   | 50       | 15       |    |          | 207.69   |     |      |
| 848 | 0.9199324 |         | 39.3    | 25       |          |    | 46.66667 | 126.62   |     |      |
| 849 | 1.416318  |         | 43      | 50       | 15       |    | 80       | 100.09   |     |      |
| 850 | 1.397828  |         | 86      | 55.9     | 7.5      |    |          | 288.265  |     |      |
| 851 | 1.29625   |         | 107.5   | 50       | 7.5      |    |          | 96.09    | 70  |      |
| 852 | 1.311891  |         | 65.5    | 50       | 37.5     |    |          | 75.07    |     |      |
| 853 | 1.675884  |         |         |          |          |    |          |          |     | 50   |
| 854 | 0.9240522 |         |         |          |          |    |          |          |     |      |
| 855 | 1.09121   |         | 86      | 50       | 7.5      |    |          | 62.56    |     |      |
| 856 | 1.004665  |         | 153.375 | 57.5     |          |    |          |          |     |      |
| 857 | 0.7796733 |         | 43      |          |          |    |          | 86.58    |     |      |
| 858 | 1.107405  |         |         | 50       | 15       |    |          | 128.12   |     |      |
| 859 | 1.259629  |         | 107.5   | 50       | 15       |    |          |          |     |      |
| 860 | 0.9682629 |         |         | 62.5     |          |    | 20       | 103.345  |     |      |

|     |           |         |          |          |        |          |     |          |     |     |
|-----|-----------|---------|----------|----------|--------|----------|-----|----------|-----|-----|
| 861 | 0.947216  |         |          | 40.8     | 12.5   | 70       | 11  | 139.932  |     |     |
| 862 | 0.7743698 |         | 75.8     | 34.66667 |        | 41       | 15  | 175.5917 |     |     |
| 863 | 1.455596  |         |          | 33       |        | 60       | 20  | 96.09    | 15  |     |
| 864 | 1.329423  |         | 215      |          |        | 70       |     |          |     |     |
| 865 | 1.166203  |         | 197.0867 | 50       |        |          | 30  | 96.09    |     |     |
| 866 | 1.667009  |         | 215      | 100      | 15     |          |     | 45.04    |     |     |
| 867 | 1.900007  |         | 107.5    |          |        |          |     |          |     | 4.5 |
| 868 | 1.516811  |         | 107.5    |          |        |          |     | 45.04    |     |     |
| 869 | 1.009783  |         | 172      | 50       | 15     |          |     | 100.09   |     | 150 |
| 870 | 1.070233  |         | 107.5    |          |        |          |     |          |     |     |
| 871 | 1.00586   |         |          | 100      | 15     |          |     | 75.07    |     | 50  |
| 872 | 1.146365  |         |          | 50       | 15     |          |     | 62.56    |     | 50  |
| 873 | 1.31696   |         |          |          |        | 100      | 40  |          |     | 50  |
| 874 | 1.190856  |         | 107.5    | 50       | 16.875 |          |     | 88.08    |     |     |
| 875 | 1.608362  |         | 172      | 50       | 7.5    |          |     |          |     |     |
| 876 | 1.45099   |         |          | 50       |        |          |     | 96.09    |     |     |
| 877 | 1.084071  |         | 34.4     | 41.11    | 15     |          |     | 39.18667 |     |     |
| 878 | 1.048231  |         | 129      |          |        |          |     | 72.07    |     |     |
| 879 | 0.8691535 |         | 52.4     |          |        |          |     | 911.8478 |     |     |
| 880 | 1.246412  |         |          | 33.33333 | 7.5    | 75       | 15  | 57.72    |     |     |
| 881 | 1.065576  | 1054.52 | 102.88   | 50       | 9.375  | 45       |     | 112.1033 |     |     |
| 882 | 1.37234   |         | 32.26    | 25       | 15     | 60       |     | 48.04    |     |     |
| 883 | 1.126974  |         |          | 50       |        |          |     | 175.16   |     |     |
| 884 | 1.023373  |         | 70       | 31.25    |        |          | 20  | 60.555   |     | 45  |
| 885 | 1.254523  |         | 66.58    | 58.33333 | 20.625 |          |     | 107.1978 |     |     |
| 886 | 1.291017  |         | 86       |          |        |          |     | 192.18   |     | 150 |
| 887 | 1.530353  |         | 86       | 212      | 7.5    |          |     | 96.09    |     |     |
| 888 | 1.946315  | 149.96  |          | 50       | 7.5    |          |     | 75.07    |     |     |
| 889 | 1.232627  |         | 26       | 100      |        |          | 7.5 | 125.12   |     |     |
| 890 | 0.9978549 |         |          | 50       |        |          |     |          |     | 100 |
| 891 | 1.203546  |         | 128.6667 | 34.375   |        |          |     |          |     | 40  |
| 892 | 1.533771  |         | 86       | 50       | 5      |          |     | 100.09   |     |     |
| 893 | 1.585868  |         | 86       | 50       | 5      |          |     |          |     |     |
| 894 | 1.281545  | 703.01  | 80.62    | 75       | 15     | 60       |     | 132.125  |     |     |
| 895 | 1.436325  |         | 43       | 50       | 15     | 86.66666 |     | 72.07    |     |     |
| 896 | 1.299594  |         | 52.4     | 100      |        |          |     | 144.13   |     |     |
| 897 | 1.131375  |         | 86       | 100      | 20     |          |     | 100.09   |     |     |
| 898 | 1.194429  |         | 48.1     | 80       | 7.5    |          |     | 88.08    |     |     |
| 899 | 1.140629  |         | 86       | 47.5     | 11.25  |          |     | 48.37667 |     |     |
| 900 | 1.205004  |         |          | 50       | 22.5   |          |     | 72.07    |     |     |
| 901 | 1.212486  | 351.51  | 107.5    | 58.33333 | 15     |          |     | 59.305   | 120 |     |

|     |           |         |          |          |        |     |          |          |     |      |
|-----|-----------|---------|----------|----------|--------|-----|----------|----------|-----|------|
| 902 | 1.277595  | 351.51  | 107.5    | 66.66666 | 11.25  |     |          | 81.375   | 120 |      |
| 903 | 1.269598  |         | 86.5     | 50       | 15     | 100 |          | 109.4333 |     |      |
| 904 | 1.441641  |         | 86       | 50       | 7.5    |     | 60       | 40.04    |     |      |
| 905 | 1.233034  |         | 172      | 50       | 15     | 30  |          | 64.06    |     |      |
| 906 | 1.032744  | 1757.53 | 220      | 50       | 11.25  |     |          | 95.7575  |     |      |
| 907 | 1.317607  |         |          | 40       | 15     |     |          | 86.58    |     |      |
| 908 | 1.143262  |         | 86       | 50       | 15     |     | 30       | 80.07    |     |      |
| 909 | 1.305776  |         | 52.4     | 50.5     | 15     |     |          |          |     |      |
| 910 | 1.063554  |         | 88.43    | 40.5     |        |     | 15       | 154.64   |     |      |
| 911 | 1.068785  |         | 88.43    | 27       |        |     | 15       | 103.0933 |     |      |
| 912 | 1.259702  |         | 65.6     | 50       | 15     |     |          | 72.07    |     |      |
| 913 | 1.355737  | 493.53  | 78.6     | 50       |        |     | 20       | 75.07    |     | 100  |
| 914 | 1.058308  |         | 53.42    |          |        |     | 90       | 75.07    |     |      |
| 915 | 1.589638  |         | 86       | 50       |        |     | 30       | 144.13   | 48  |      |
| 916 | 1.021176  |         | 39.3     | 55       | 30     |     |          | 144.13   |     |      |
| 917 | 0.8619066 | 3515.07 | 64.5     |          |        |     |          |          |     |      |
| 918 | 1.631377  |         |          | 50       | 15     |     |          |          |     |      |
| 919 | 1.234176  |         | 19.66    |          |        |     | 60       |          |     |      |
| 920 | 1.077405  |         |          |          |        |     |          |          |     |      |
| 921 | 1.278095  |         | 96.75    | 82       | 28.125 | 120 |          | 582.205  |     |      |
| 922 | 1.075459  |         | 43       | 50       | 5      |     |          | 72.07    |     |      |
| 923 | 1.247375  |         | 42       |          |        | 60  |          | 237.22   |     | 21   |
| 924 | 1.088153  |         | 52.4     |          |        |     | 38.33333 | 237.22   |     |      |
| 925 | 0.9180202 |         |          | 32.5     | 7.5    |     | 60       | 253.6833 | 30  | 12.5 |
| 926 | 1.187965  |         |          | 60.5     | 22.5   | 60  | 45       | 240.22   | 45  |      |
| 927 | 0.9934146 |         | 33.85333 | 50       |        |     |          | 158.5714 |     |      |
| 928 | 1.10273   |         |          | 25       | 15     |     |          | 33.33333 |     |      |
| 929 | 1.185621  | 527.265 |          |          |        | 45  |          | 45.04    |     |      |
| 930 | 1.367427  |         | 48.38    | 61       | 22.5   | 100 | 40       | 172.16   |     |      |
| 931 | 1.366635  |         | 43       | 60       | 21.5   |     | 30       | 381.37   |     |      |
| 932 | 1.479716  |         | 107.5    | 50       |        |     |          |          |     | 50   |
| 933 | 0.9249959 |         | 34.6     | 25       | 7.5    | 60  |          | 96.09    |     |      |
| 934 | 1.084236  | 1446.2  | 131      |          |        |     |          | 108.6    |     |      |
| 935 | 1.079677  |         |          |          |        |     |          | 25.02    |     |      |
| 936 | 0.8424889 | 828.55  | 86       |          | 22.5   |     |          | 62.56    |     |      |
| 937 | 0.9758546 |         | 64.5     | 110      | 22.5   |     | 20       | 163.352  |     |      |
| 938 | 1.287525  | 713.06  | 53.75    | 116.6667 | 32     |     | 20       | 189.175  | 15  |      |
| 939 | 1.372101  |         | 86       | 63.5     |        |     |          | 56.3     |     |      |
| 940 | 1.299553  |         |          | 75       | 15     |     |          | 240.22   |     |      |
| 941 | 1.495945  |         |          | 110.3333 | 30     |     |          | 240.22   |     |      |
| 942 | 1.306035  |         | 172      | 100      | 7.5    |     |          | 180.17   |     |      |



|     |           |          |          |          |        |     |       |          |    |    |
|-----|-----------|----------|----------|----------|--------|-----|-------|----------|----|----|
| 943 | 1.417908  |          | 129      | 157      | 30     |     |       | 72.07    |    |    |
| 944 | 1.572382  |          | 26.2     | 50       | 16     |     |       | 112.605  |    |    |
| 945 | 1.398246  |          |          | 50       | 15     |     |       | 72.07    |    |    |
| 946 | 0.9268957 |          |          | 59       |        |     | 25    | 96.09    |    |    |
| 947 | 0.9285716 |          | 82       | 60       | 7.5    | 30  | 12.5  | 312.292  |    |    |
| 948 | 1.4253    | 403.71   |          | 100      |        | 60  | 80    | 45.04    | 30 |    |
| 949 | 1.399789  |          | 39.2     | 50       | 15     |     |       | 147.14   |    |    |
| 950 | 1.082866  |          |          |          |        |     |       | 72.07    |    |    |
| 951 | 1.382086  | 300.68   | 74.35333 |          |        |     |       | 73.06333 |    | 50 |
| 952 | 1.09378   |          | 75.8     | 50       |        |     | 22.5  | 108.1    |    |    |
| 953 | 1.27511   |          | 86       | 100      | 15     |     |       | 150.14   |    |    |
| 954 | 1.08331   |          | 175      | 60       | 15     |     |       | 75.07    |    |    |
| 955 | 1.011574  |          | 86       |          |        |     | 45    | 192.18   |    |    |
| 956 | 0.9786904 |          | 43       | 50       | 3.75   |     | 32.5  | 96.09    |    |    |
| 957 | 0.9287913 |          |          | 26.5     | 7.5    |     | 40    | 97.7575  |    | 50 |
| 958 | 1.156122  |          | 28.6     | 50       | 7.5    |     |       | 47.545   |    |    |
| 959 | 1.252909  |          | 78.83334 | 50       | 15     |     |       | 120.11   |    |    |
| 960 | 1.16489   |          | 81.20667 | 50       | 11.25  |     |       | 116.605  |    |    |
| 961 | 1.281729  |          |          | 50       |        |     |       | 72.07    |    | 50 |
| 962 | 1.042215  |          | 86       |          |        |     |       | 180.17   |    |    |
| 963 | 1.354444  |          | 86       | 50       | 15     |     |       | 151.39   |    |    |
| 964 | 1.232347  | 103.27   | 95.83    | 38.5     | 5      |     | 25.5  | 170.4075 |    |    |
| 965 | 0.9887418 | 2812.05  | 91.73    | 50       | 15     |     | 110   | 554.51   |    |    |
| 966 | 1.227435  |          |          | 50       | 7.5    |     | 36    |          | 15 |    |
| 967 | 1.299817  | 351.51   |          | 78       | 7.5    | 45  |       | 106.6    |    |    |
| 968 | 1.454455  | 366.6767 |          | 50       | 29.25  | 120 |       | 62.555   |    |    |
| 969 | 1.276013  |          | 53.75    | 50       | 15     |     | 60    | 37.535   |    |    |
| 970 | 1.131031  |          | 86       | 35       | 7.5    |     | 30.75 | 58.8     |    | 40 |
| 971 | 1.171967  |          | 131      | 50       |        |     |       | 45.04    |    |    |
| 972 | 1.535664  |          |          | 50       |        |     |       |          |    |    |
| 973 | 1.518213  |          | 43       | 97.5     | 15     |     |       | 160.14   |    |    |
| 974 | 1.419351  |          | 43       | 73.33334 | 15     | 60  |       | 77.32    |    | 15 |
| 975 | 1.011444  | 144.62   | 43       |          |        |     |       | 175.164  |    |    |
| 976 | 1.123401  |          | 279.5    |          |        |     |       | 80.07    |    |    |
| 977 | 0.9326853 |          | 56.5     | 50       | 15     |     |       | 148.135  |    | 50 |
| 978 | 1.119987  |          | 70.15    | 50       | 15     |     |       | 97.59    |    |    |
| 979 | 1.197948  |          | 52.4     | 58.33333 | 18.75  |     |       | 94.58501 |    |    |
| 980 | 1.086353  |          | 39       | 41.66667 | 31.875 | 30  |       | 136.928  |    |    |
| 981 | 1.20764   |          |          | 50       |        |     | 50    |          |    |    |
| 982 | 1.647089  |          | 86       |          |        |     |       | 72.07    |    |    |
| 983 | 1.051048  | 1757.53  | 139.75   | 25       | 15     |     | 30    | 174.16   |    |    |

|      |           |        |        |      |       |     |    |          |    |     |
|------|-----------|--------|--------|------|-------|-----|----|----------|----|-----|
| 984  | 1.198161  |        | 172    |      |       |     |    | 66.06    |    |     |
| 985  | 0.8991843 |        |        | 30   |       |     | 80 |          | 30 |     |
| 986  | 1.386983  |        |        | 50   |       | 60  | 70 | 96.09    |    |     |
| 987  | 1.381459  |        |        | 50   |       | 60  | 15 | 186.13   |    |     |
| 988  | 1.207694  |        | 86     |      |       |     |    | 150.14   |    | 50  |
| 989  | 1.130726  |        | 182.25 | 37.5 | 15    |     |    | 114.105  |    |     |
| 990  | 1.221219  |        | 96.75  | 50   |       |     |    | 192.18   |    |     |
| 991  | 1.063637  |        | 119.75 | 50   | 7.5   |     | 80 | 105.43   |    |     |
| 992  | 1.294246  |        | 86     | 50   | 15    |     |    | 84.78223 |    |     |
| 993  | 1.263196  |        | 86     | 50   | 7.5   |     |    | 75.07    |    | 50  |
| 994  | 1.411361  | 901.82 | 86     |      |       |     |    | 196.18   |    |     |
| 995  | 1.04323   |        | 172    | 100  | 15    | 120 |    | 336.31   |    | 50  |
| 996  | 1.209219  | 143.16 | 86     | 50   |       |     | 30 | 74.07    |    |     |
| 997  | 0.9504787 |        | 96.75  | 110  |       |     |    | 132.625  |    |     |
| 998  | 0.7008134 |        |        | 42.5 |       |     | 20 |          |    |     |
| 999  | 1.141201  |        | 86     | 75   | 13.75 |     |    | 120.445  |    | 50  |
| 1000 | 1.033448  |        | 43     | 27   | 7.5   |     |    | 192.18   |    |     |
| 1001 | 1.305428  |        |        | 50   |       |     |    |          |    |     |
| 1002 | 1.402646  |        |        | 50   |       |     |    | 240.22   |    |     |
| 1003 | 1.581217  |        | 107.5  | 30   |       |     |    | 48.04    |    |     |
| 1004 | 1.483816  |        | 236.5  | 50   | 22.5  |     |    | 32.53    |    |     |
| 1005 | 1.390105  |        | 172    | 100  | 45    |     |    | 75.07    |    | 100 |

| id | fruitjuices_portion | fruits_portion | industjuices_portion | leafyveg_portion | milk_portion | pasta_portion | pizza_portion | redmeat_portion | rice_portion | saltedsnacks_portion |
|----|---------------------|----------------|----------------------|------------------|--------------|---------------|---------------|-----------------|--------------|----------------------|
| 1  |                     |                |                      |                  |              | 110           |               | 25              |              | 50.24                |
| 2  |                     |                |                      | 30               |              |               |               | 52.5            | 50           | 155                  |
| 3  |                     |                | 318.28               | 20               | 99.01        |               |               | 169.2           | 125          |                      |
| 4  |                     |                | 200                  | 30               |              |               |               | 50              | 100          | 7.99                 |
| 5  |                     | 64             |                      | 50               | 247.53       |               |               |                 | 50           |                      |
| 6  |                     | 88             | 240                  |                  | 124.27       |               |               |                 |              |                      |
| 7  |                     |                | 220                  |                  |              |               |               | 100             | 200          |                      |
| 8  |                     |                |                      |                  | 151.61       | 220           |               |                 | 159          | 30                   |
| 9  |                     | 86             |                      | 32               | 99.01        |               |               |                 | 181          |                      |
| 10 |                     | 473            |                      |                  |              | 220           |               | 100             | 75           |                      |
| 11 |                     | 40             |                      |                  |              | 400           |               |                 |              |                      |
| 12 |                     | 238.3333       | 480                  | 35               | 124.065      | 208.8         | 100.17        | 110             | 127.5        |                      |
| 13 |                     |                |                      | 4.27             | 202.7633     |               |               |                 | 77.5         | 109.98               |
| 14 | 240.28              |                |                      |                  | 185.645      |               |               | 100             | 100          |                      |
| 15 |                     |                |                      |                  |              |               |               |                 | 75           |                      |
| 16 |                     |                |                      |                  |              |               |               |                 | 75           |                      |
| 17 | 576.68              | 86             |                      |                  | 199.3967     | 160           | 211.75        |                 | 129.1667     |                      |
| 18 |                     | 55             | 224                  | 30               | 41.25        | 120           |               | 150             | 155          |                      |
| 19 |                     | 55             | 112                  | 22.5             |              | 72            |               | 107.5           | 93           |                      |
| 20 |                     | 172            |                      | 27               | 128.92       |               |               | 140             | 187.5        |                      |
| 21 |                     | 86             | 112                  | 20               | 118.26       |               |               | 66.66666        | 200          |                      |
| 22 |                     |                |                      |                  |              |               |               | 100             | 116.25       |                      |
| 23 |                     |                |                      |                  | 247.53       | 301.88        |               |                 | 38.76        |                      |
| 24 |                     | 127.5          | 186.6667             | 30               | 123.76       | 110           |               | 140             | 186          |                      |
| 25 |                     |                |                      | 100              | 74.26        | 330           |               | 62.5            | 477          |                      |
| 26 |                     | 126.5          |                      | 60               | 123.7625     | 220           |               | 20              | 296          |                      |
| 27 |                     |                | 288                  |                  | 111.39       |               |               |                 | 283.96       |                      |
| 28 |                     | 168.6667       |                      | 50               | 222.78       | 100           |               | 299.4           | 174.6667     | 40                   |
| 29 |                     | 155            |                      |                  | 103.14       |               |               | 91.25           | 213.75       |                      |
| 30 |                     | 225            |                      |                  |              |               |               |                 | 103.3333     |                      |
| 31 |                     |                |                      | 20               | 108.6333     | 240.04        |               |                 | 124          |                      |
| 32 |                     | 86             | 353.3333             |                  | 132.01       |               |               | 30              | 116.25       |                      |
| 33 |                     |                |                      |                  |              | 320           |               | 120             | 200          |                      |
| 34 |                     |                |                      | 30               | 247.53       |               |               | 100             | 125          |                      |
| 35 |                     |                |                      | 16               | 247.53       | 196           |               | 220             | 25           |                      |
| 36 |                     | 126.25         |                      | 29               | 331.525      | 222.5         |               |                 | 50           |                      |
| 37 | 240.28              |                |                      | 30               |              |               |               | 17.5            |              | 39.93                |
| 38 |                     |                |                      |                  | 148.52       |               |               |                 | 77.5         |                      |
| 39 |                     |                |                      | 20               | 103.14       | 45            |               |                 | 62.5         |                      |
| 40 |                     | 200            |                      | 30               | 207.12       |               |               | 135             |              |                      |

|    |          |          |          |      |          |          |        |          |          |        |
|----|----------|----------|----------|------|----------|----------|--------|----------|----------|--------|
| 41 | 209.65   | 355      |          | 30   | 207.12   |          |        | 100      |          |        |
| 42 | 600.89   |          |          | 100  | 393.525  | 330      |        | 62       | 125      |        |
| 43 |          | 145.92   |          | 20   |          |          |        | 15       | 100      | 137.32 |
| 44 | 900.3    | 326.6667 | 301.9    | 60   | 50.745   |          |        |          |          |        |
| 45 |          | 269.2857 |          |      | 541.7693 |          |        | 62.5     | 100      |        |
| 46 |          |          | 533.3333 |      | 154.7    | 320      |        | 75       | 100      |        |
| 47 | 217.5833 |          |          | 10   | 310.68   |          |        |          |          |        |
| 48 | 164.84   | 150      |          |      |          | 99       |        | 15       | 108.5    |        |
| 49 |          | 60       | 266.6667 |      | 154.7    |          |        |          | 93       |        |
| 50 |          |          |          |      |          | 80       |        | 60       | 100.75   |        |
| 51 | 240.38   | 98       |          | 20   | 148.515  |          |        | 75       | 69.75    |        |
| 52 |          | 86       |          |      |          | 180      |        |          | 125      |        |
| 53 |          |          |          | 40   |          |          |        | 23.33333 | 300      |        |
| 54 |          | 86       |          | 20   | 165.02   |          |        | 35       | 265      |        |
| 55 |          | 156      |          | 20   |          |          |        |          | 193.75   |        |
| 56 |          |          |          | 39.5 | 314.05   |          |        | 60       | 100      |        |
| 57 |          |          |          | 27   | 341.38   |          |        | 113.3333 | 209.375  |        |
| 58 |          | 40       |          | 45   |          |          |        | 35       | 117.9167 |        |
| 59 |          | 142.375  |          |      | 148.52   |          |        |          |          |        |
| 60 |          |          |          |      |          |          |        |          | 298.125  |        |
| 61 |          |          |          |      |          | 259.95   |        | 259.95   | 250      |        |
| 62 |          | 145      |          | 40   | 182.305  | 40       |        | 40       | 62.33333 |        |
| 63 |          | 159      | 344.5417 | 18   | 278.47   |          |        | 143.3333 | 146.5    |        |
| 64 |          | 42       |          |      | 148.52   |          | 285.46 |          | 100      |        |
| 65 |          |          |          |      | 74.26    |          | 249.28 |          | 125      |        |
| 66 |          |          | 240      |      | 198.02   |          | 186.96 |          | 112.5    |        |
| 67 |          |          |          |      | 99.01    | 63.33333 |        |          | 141.6667 |        |
| 68 |          | 90       |          |      | 49.51    | 50       | 50.09  |          | 77.5     |        |
| 69 |          | 251.17   |          |      | 26.82    |          |        | 14       | 87.5     |        |
| 70 |          | 140      |          |      |          |          |        | 256      | 187.5    | 60     |
| 71 |          | 450      |          | 80   | 297.03   |          |        |          | 79.16666 |        |
| 72 |          |          | 240      |      | 34.785   |          |        | 175      | 125      |        |
| 73 |          |          |          | 70   | 297.03   |          |        |          | 100      |        |
| 74 |          |          |          | 15   | 99.01    |          |        |          | 150      |        |
| 75 |          |          |          |      | 77.35    |          |        |          | 250      |        |
| 76 |          | 133      |          | 70   |          |          | 200.34 | 74.85    | 166.6667 |        |
| 77 |          | 350      |          |      |          | 112      |        | 100      | 112.5    |        |
| 78 |          |          |          |      |          |          |        | 140      | 100      |        |
| 79 |          | 172      | 194.4444 | 45   | 143.355  |          |        | 100      | 142.815  | 79.95  |
| 80 |          | 67.83334 |          |      | 77.225   | 208.8    |        | 112      | 129.5    |        |
| 81 |          |          |          |      | 99.01    | 79.6     |        | 40       | 198.5    |        |

|     |         |          |          |      |          |       |        |          |          |        |
|-----|---------|----------|----------|------|----------|-------|--------|----------|----------|--------|
| 82  |         | 150      |          | 132  | 136.29   | 479.2 |        | 70       | 93       |        |
| 83  | 503.165 |          | 513.31   | 40   |          |       |        | 150      | 200      |        |
| 84  |         |          |          |      | 297.03   |       |        |          | 155      |        |
| 85  |         |          | 312.66   |      |          | 112.5 |        | 47.875   | 142.75   |        |
| 86  | 150.95  |          | 256.66   | 40   |          |       |        |          | 87.5     |        |
| 87  |         |          | 520      |      | 206.27   |       |        |          | 187.5    |        |
| 88  |         |          |          |      | 58.79    |       |        | 60       | 106.25   | 250    |
| 89  |         |          | 56       |      | 90.76    | 260   |        | 88.33334 | 200      |        |
| 90  |         |          | 256.66   |      | 82.51    | 220   |        | 92.5     | 150      |        |
| 91  |         | 115      |          | 27.5 | 123.76   |       |        |          | 125      |        |
| 92  |         | 86       |          | 32   |          |       |        | 100      | 100      |        |
| 93  |         | 150      |          |      | 230.51   |       |        |          | 312      | 19.98  |
| 94  |         | 107.5    |          |      | 132.0167 |       |        | 59.33333 | 71.5     |        |
| 95  |         | 27.5     | 150.34   | 60   | 154.7    |       |        | 150      | 125      |        |
| 96  |         |          |          |      |          |       |        | 95       | 279.1667 |        |
| 97  |         | 133      |          | 29   | 103.14   |       |        | 60       | 50       |        |
| 98  |         | 175      | 149.3333 | 35   | 318.2094 |       |        | 100      | 224.75   | 20     |
| 99  |         | 266      |          |      | 97.98    |       |        | 96       | 252.75   |        |
| 100 | 240.36  | 80       |          |      | 117.575  |       |        | 98.33334 | 167.125  |        |
| 101 |         |          |          |      | 64.46    |       |        |          | 62       |        |
| 102 |         | 155      |          | 20   | 168.4533 |       |        | 50       | 62       |        |
| 103 | 288.34  | 254.5    |          |      | 90.245   |       | 572.98 | 106.6667 | 241.3333 |        |
| 104 |         |          |          | 67.5 |          |       |        | 154      | 194.3333 | 40.09  |
| 105 |         |          |          | 75   | 185.645  |       |        | 92.5     | 124.75   | 225.17 |
| 106 |         | 86       | 186.6667 | 23.5 | 185.645  |       |        | 115      | 208      |        |
| 107 |         |          |          | 45   | 247.53   |       |        | 105      | 105      |        |
| 108 |         |          |          | 20   | 77.35    |       |        |          | 62       |        |
| 109 |         |          |          |      | 173.27   |       |        |          |          |        |
| 110 |         |          |          |      | 128.92   |       |        | 60       | 212      |        |
| 111 |         | 127.3333 | 84       | 30   | 128.92   | 100   |        | 86       | 142.0833 |        |
| 112 |         | 40       |          | 17.5 | 113.235  |       |        | 95       | 97.375   |        |
| 113 |         |          |          |      |          |       |        |          | 212      |        |
| 114 |         |          |          |      | 247.53   |       |        |          | 106      |        |
| 115 |         | 110.25   | 252.4    | 30   | 113.64   | 120   | 158.25 |          | 77.5     |        |
| 116 | 314.48  | 155      |          |      | 272.2825 |       | 504.74 | 90       | 848      |        |
| 117 |         |          |          | 100  | 148.52   | 500   |        |          | 424      |        |
| 118 |         | 100      |          | 16   | 77.35    |       |        |          | 318      |        |
| 119 |         | 110      |          |      | 128.92   |       |        | 12.5     | 106      |        |
| 120 | 240.28  |          |          | 50   |          |       |        | 100      | 132.5    |        |
| 121 |         |          |          |      |          |       |        | 72.33334 | 116.25   |        |
| 122 | 240.21  |          |          | 51   | 154.7    |       |        | 100      | 311.9167 | 79.95  |

|     |        |          |          |          |          |        |        |          |          |        |
|-----|--------|----------|----------|----------|----------|--------|--------|----------|----------|--------|
| 123 |        |          |          |          |          |        |        | 160      | 649.25   |        |
| 124 |        |          |          |          |          |        |        | 160      | 299      | 31.96  |
| 125 |        | 86       | 287.7956 | 36       | 77.35    |        | 113.19 | 170      | 164.125  |        |
| 126 |        |          | 256.6667 |          | 515.68   |        |        | 140      | 181      | 124.94 |
| 127 |        |          | 11.05    | 40       | 289.9667 | 25     |        | 65       | 115.5    |        |
| 128 | 288.3  |          | 186.6667 | 38       | 140.27   | 320.02 |        | 100      | 93       |        |
| 129 |        |          |          | 35       | 114.23   |        |        | 205      | 155.75   |        |
| 130 |        | 571      |          | 15       |          |        |        |          | 106      |        |
| 131 |        | 86       |          | 45       | 247.53   |        |        | 30       | 132.5    |        |
| 132 |        |          | 480      | 45       | 123.76   |        |        | 270      | 159      |        |
| 133 |        | 198      |          | 60       | 206.27   |        |        | 100      | 132.5    |        |
| 134 |        | 90       | 155.5556 | 18.33333 | 173.27   | 250    |        | 183.3333 | 181.75   | 40     |
| 135 |        | 120.5    |          | 60       | 247.53   |        |        | 125      | 106      |        |
| 136 |        |          |          |          |          |        |        | 100      | 106      |        |
| 137 |        |          | 444.4445 | 45       | 206.27   |        |        |          | 106      |        |
| 138 | 251.58 |          |          | 123      | 257.84   |        |        |          | 124      |        |
| 139 |        |          |          | 50       |          |        |        | 190      | 50       |        |
| 140 |        |          | 360      | 10       |          | 100    |        | 330      | 300      |        |
| 141 |        |          | 240      |          |          |        |        | 93.33334 |          |        |
| 142 |        | 135.5    |          | 45       | 124.7933 |        |        | 20       | 76.66666 |        |
| 143 |        | 130      |          |          | 128.725  |        |        | 71.25    | 387      |        |
| 144 |        |          |          |          | 154.71   |        |        |          | 318      |        |
| 145 | 382.62 | 222.5    |          | 15       | 230.3367 |        |        | 80       | 356.75   |        |
| 146 |        | 140      | 240      | 30       | 156.7667 |        |        |          | 365.3333 |        |
| 147 | 142.24 | 80       |          |          | 88.7     |        |        | 70       | 130.5    | 49.92  |
| 148 |        | 107.5    |          |          | 117.575  |        |        | 100      | 116.25   |        |
| 149 |        | 243.3333 |          | 40       | 128.92   |        |        |          | 318      |        |
| 150 |        |          | 204.0778 | 20.3     | 272.28   |        |        | 50       | 96.75    |        |
| 151 |        | 315      |          |          |          |        |        |          | 212      |        |
| 152 | 144.23 | 82.25    |          |          | 134.9    |        |        | 60       | 100      |        |
| 153 | 150.95 | 235      | 155.5556 | 15       | 56.47    |        |        | 125      | 312      | 647.32 |
| 154 |        |          |          |          | 123.76   |        |        |          | 106      | 60     |
| 155 | 240.36 | 187.5    | 153.99   | 22.71    | 160.89   |        |        | 55       | 49.875   |        |
| 156 |        |          |          |          | 99.01    | 90.13  |        | 40.09    |          |        |
| 157 |        | 520      |          |          | 96.95    |        |        |          |          |        |
| 158 |        | 113.75   |          | 100      |          |        | 113.19 | 40       | 154.625  | 60     |
| 159 |        | 196.75   |          | 30       | 144.39   |        |        |          | 145.75   | 66.33  |
| 160 | 314.48 | 240      |          |          |          |        |        | 205      | 209      | 37.5   |
| 161 |        |          | 112      | 20       | 138.0925 |        |        | 55       | 112.3767 |        |
| 162 |        | 170      |          |          | 206.27   | 191.9  |        | 76.25    | 170.6667 |        |
| 163 |        | 130      |          |          |          |        | 176.91 |          |          |        |

|     |          |          |          |    |          |     |        |          |          |
|-----|----------|----------|----------|----|----------|-----|--------|----------|----------|
| 164 | 288.25   |          | 205.3333 | 29 | 162.44   |     |        | 111.71   |          |
| 165 |          | 220      | 168      |    | 205.6275 |     |        | 100      | 257.5    |
| 166 |          |          |          |    |          |     |        | 100      | 200      |
| 167 |          | 86       |          | 40 |          |     |        | 80       | 371      |
| 168 |          |          |          |    |          | 320 |        |          | 42.62667 |
| 169 |          | 90       |          |    | 123.76   |     |        | 200      | 100      |
| 170 |          |          | 186.6667 | 36 | 247.53   |     | 60.095 |          | 68.66666 |
| 171 |          |          | 380.42   |    |          |     |        | 150      | 318      |
| 172 |          | 40       |          |    |          | 110 | 170.26 |          |          |
| 173 | 169.57   |          |          |    | 70.39    |     | 125.29 | 100      | 69.5     |
| 174 |          | 86       |          |    | 99.01    |     |        | 140      | 212      |
| 175 |          | 86       |          | 40 | 49.51    |     |        |          | 132.5    |
| 176 |          | 103.3333 |          |    |          |     |        |          |          |
| 177 |          |          | 112      | 30 | 74.26    | 55  |        | 60       | 100      |
| 178 |          |          |          | 50 |          |     |        | 30       | 450      |
| 179 |          |          |          | 60 | 123.76   |     |        |          | 150      |
| 180 |          |          | 240      | 10 | 23.21    |     |        | 90       | 158.875  |
| 181 |          | 167.5    |          |    | 111.39   | 50  |        | 65       | 156.25   |
| 182 | 240.38   |          |          |    |          |     |        | 85       | 131.25   |
| 183 |          |          | 240      | 30 | 99.01    |     |        | 80       | 125      |
| 184 |          |          |          | 30 |          |     |        | 100      | 187.5    |
| 185 |          |          |          |    |          |     |        | 20       | 124      |
| 186 |          | 140      |          |    |          |     |        | 35       | 93       |
| 187 | 480.72   | 446      |          | 60 |          |     |        | 68.5     | 424      |
| 188 |          |          | 480      |    | 247.53   |     | 189.96 | 30       |          |
| 189 | 250.39   | 50       |          | 35 | 546.62   |     |        | 65       | 155      |
| 190 |          |          |          |    | 322.2222 |     |        | 70       | 200      |
| 191 | 310.4825 | 110      |          |    | 242.71   |     |        | 50       | 105.315  |
| 192 |          |          |          |    |          |     |        | 45       | 124      |
| 193 | 150.22   | 97.25    |          | 32 | 190.29   |     |        | 47.8125  | 132.5    |
| 194 | 53.07    | 260      |          | 60 | 123.0333 |     |        | 100      | 129.82   |
| 195 | 301.9    | 180      | 112      | 30 |          |     |        | 125      | 65.88    |
| 196 | 240      | 113      |          | 60 | 247.53   | 80  |        | 150      | 310      |
| 197 |          |          |          |    |          |     |        | 140      | 318      |
| 198 |          |          | 186.6667 |    |          |     |        |          | 30       |
| 199 |          |          |          | 40 |          |     |        |          | 62.5     |
| 200 |          | 635      |          | 30 |          |     |        | 128.3333 | 150      |
| 201 |          |          |          |    |          | 300 |        |          | 348.75   |
| 202 | 75.48    | 135      |          |    | 154.7322 |     |        | 60       | 119.25   |
| 203 |          | 30       |          | 27 | 151.61   | 25  |        | 73.33334 | 123.6667 |
| 204 |          |          | 252.6    |    |          |     |        | 125      | 159      |

|     |         |          |          |          |          |     |        |          |          |          |
|-----|---------|----------|----------|----------|----------|-----|--------|----------|----------|----------|
| 205 |         |          |          |          |          | 75  |        |          | 217.25   |          |
| 206 | 251.58  |          |          |          | 24.75    | 320 |        |          | 212      |          |
| 207 |         |          | 373.3333 |          |          |     |        | 80       | 318      |          |
| 208 |         | 220      |          | 40       | 247.52   |     |        |          |          |          |
| 209 |         |          |          |          |          | 320 |        |          |          |          |
| 210 |         | 180      |          |          | 148.52   |     |        |          | 77.5     |          |
| 211 |         | 84       |          | 30       | 105.2    |     |        | 200      | 158.875  | 60       |
| 212 |         | 84       |          | 30       | 113.864  |     |        | 137.5    | 158.875  | 60       |
| 213 |         | 171      |          |          | 99.01    | 260 | 192.31 |          | 77       | 29.48333 |
| 214 |         |          |          | 37.5     | 104.68   |     |        | 52.5     | 54.25    |          |
| 215 |         | 110      |          | 30       | 151.61   |     |        | 100      | 169.25   |          |
| 216 |         | 180      | 228      | 10.33333 | 137.17   |     |        | 65       | 457.125  |          |
| 217 |         |          |          |          | 247.53   |     |        | 170      | 133.125  |          |
| 218 |         | 88       | 186.6667 | 5        | 95.91667 |     |        | 50       | 125      |          |
| 219 |         |          |          | 26.66667 | 129.2633 |     |        | 40       | 212      |          |
| 220 | 240.28  |          |          | 36       |          |     |        |          | 400      |          |
| 221 | 165.29  | 97.5     |          |          | 173.27   |     |        | 100      | 91.75    |          |
| 222 |         |          |          |          |          |     |        | 80       | 31       |          |
| 223 |         |          |          |          | 165.02   |     |        | 54       | 392.5    |          |
| 224 | 176.92  | 101.25   | 137.5    |          |          | 330 | 249.28 |          |          |          |
| 225 |         | 210      |          |          | 142.395  |     |        | 40       |          |          |
| 226 | 142.24  | 165      |          | 10       | 49.51    |     |        | 81       | 81       |          |
| 227 | 144.17  | 130      |          | 20       |          | 100 |        | 202.5    | 141.4375 |          |
| 228 |         |          |          | 12.5     | 63.43    | 60  |        | 80       | 186      |          |
| 229 | 120.16  | 85       |          | 30       | 247.53   | 75  |        |          | 98.33334 | 65       |
| 230 |         | 172      | 186.6667 |          |          |     |        | 80       | 116.25   |          |
| 231 |         |          | 52.62    |          | 86.635   |     |        |          | 155.75   | 30       |
| 232 |         |          | 52.62    |          | 86.635   |     |        |          | 89.5     | 30       |
| 233 |         | 235      |          |          | 77.35    |     |        | 78.33334 | 320.5    |          |
| 234 | 240.28  | 133.3333 | 112      | 30       | 74.515   |     |        | 95       | 116.25   |          |
| 235 | 365.43  | 95       | 208.81   |          | 77.35    |     | 113.05 |          | 106      |          |
| 236 | 367.085 |          |          |          | 247.53   |     |        |          | 62       |          |
| 237 |         | 150.5    |          |          |          | 45  |        | 90       | 248      |          |
| 238 |         |          | 224      |          |          |     |        | 60       | 132.5    |          |
| 239 |         | 140      | 167.7489 |          | 198.02   |     |        | 50       | 185.5    |          |
| 240 |         | 117.5    | 229.16   | 40       |          |     |        | 80       | 247.3333 |          |
| 241 | 480.71  | 135      |          |          | 129.45   |     |        |          | 93       |          |
| 242 |         |          | 149.3333 | 3.75     |          | 300 |        | 75       | 124.375  | 46       |
| 243 |         | 160      |          | 50       | 99.01    |     |        | 125.3333 | 392      |          |
| 244 | 300.35  | 172      | 544.4445 |          | 360.18   |     | 100.17 | 123.3333 | 181      | 160.8133 |
| 245 |         |          | 186.6667 |          | 148.52   |     |        | 87.5     | 77.5     |          |



|     |        |          |          |          |          |        |       |          |          |       |
|-----|--------|----------|----------|----------|----------|--------|-------|----------|----------|-------|
| 246 | 167.72 | 190.625  | 131.56   | 79       | 114.31   |        |       | 79       |          |       |
| 247 |        |          |          |          |          | 110    |       | 140      | 273.8333 |       |
| 248 |        | 150      |          |          | 99.01    | 75     |       |          | 125      |       |
| 249 | 243.47 | 246.5    |          |          | 198.025  |        |       | 43.33333 | 172.6667 |       |
| 250 |        | 115      | 186.6667 |          | 82.51    |        |       | 80       | 232.5    |       |
| 251 | 70.1   | 142.4    |          | 22.5     | 148.515  |        |       | 38.64    | 82.93333 | 20    |
| 252 |        | 135      |          |          | 58.79    | 110.92 |       | 86.66666 | 282.6667 |       |
| 253 |        | 238.6667 | 253.61   |          | 156.0767 | 660    |       | 60       | 62       | 20    |
| 254 | 251.58 | 108      |          | 10       |          |        |       | 50       | 62       |       |
| 255 |        |          |          |          | 371.295  | 67.6   |       | 50       | 116.25   |       |
| 256 | 144.2  | 40       |          |          |          |        |       |          |          |       |
| 257 |        | 172      |          |          |          | 110.01 |       |          | 265      |       |
| 258 | 245.97 | 94.5     |          | 21.66667 | 159.86   |        |       | 20       | 105.6667 |       |
| 259 |        | 87       |          |          | 229.3478 | 30     |       | 75       | 162.25   |       |
| 260 |        | 151.25   |          |          | 63.17    |        |       |          | 149.75   |       |
| 261 |        |          | 509.25   |          | 123.76   | 200.1  |       |          | 318      | 100   |
| 262 | 360.54 |          |          |          | 297.03   |        |       | 80.19    | 238.5    |       |
| 263 |        |          |          |          | 201.11   |        |       |          | 93       |       |
| 264 |        | 247.5    | 224      | 40       | 143.945  |        |       | 60       | 142.0833 |       |
| 265 |        | 133      |          | 42.5     | 128.92   |        |       | 80       | 361.095  |       |
| 266 |        | 86       |          |          | 122.39   |        |       |          | 100      |       |
| 267 |        |          |          | 40       | 25       |        |       | 101.625  | 73.625   |       |
| 268 |        | 90       |          | 30       |          |        |       | 35       | 93.75    |       |
| 269 |        | 170.25   |          | 52.5     |          |        | 174.5 |          | 156.25   |       |
| 270 |        | 120.5    | 252.6    |          | 247.53   |        |       |          | 50       |       |
| 271 |        | 213      | 186.6667 |          | 185.64   |        |       | 145      | 250      |       |
| 272 |        | 100      |          | 15       | 279.61   |        |       | 100      | 78.79333 |       |
| 273 |        | 133      |          | 45       | 110.0133 | 254.4  |       | 120      | 150      |       |
| 274 |        | 86       |          |          | 77.35    |        |       | 50       | 155      | 80.38 |
| 275 |        | 64       |          |          | 74.26    |        |       | 30       | 116.25   | 57.69 |
| 276 |        | 59.125   |          | 40       | 122.215  |        |       | 20       | 101.3333 |       |
| 277 |        | 122      |          |          | 46.41    |        |       | 20       | 50       |       |
| 278 |        | 137.5    | 137.5    | 40       | 992.2333 |        |       | 112.5    | 77.5     |       |
| 279 |        |          |          |          | 47.32    |        |       | 200      | 62.5     | 125   |
| 280 |        |          | 151.56   | 20       |          | 220    |       | 75       | 77.5     |       |
| 281 |        | 60       |          | 28.3     | 74.26    |        |       |          | 76.2     |       |
| 282 |        | 135      |          |          | 116.025  |        |       |          | 124      |       |
| 283 |        | 40       | 55.55556 | 25.3     | 99.01    | 82.06  |       |          | 50       |       |
| 284 | 144.23 |          |          |          |          |        |       |          | 125      |       |
| 285 |        |          |          |          | 247.53   |        |       | 18.75    | 93       |       |
| 286 | 240.36 |          |          |          | 132.01   | 149.4  |       | 33.33    | 90.66666 |       |

|     |         |          |          |          |          |       |       |          |          |        |
|-----|---------|----------|----------|----------|----------|-------|-------|----------|----------|--------|
| 287 | 607.99  | 86       |          |          | 99.01    |       | 76.87 |          |          |        |
| 288 |         | 86       | 240      | 20       | 99.01    |       |       | 50       | 106      |        |
| 289 |         | 40       |          |          | 99.01    |       |       | 80       | 62       |        |
| 290 |         |          |          | 15       | 74.26    | 80    |       | 120      | 100      |        |
| 291 |         | 180      |          | 30       | 51.57    |       |       | 65       | 250      |        |
| 292 |         | 99.91666 |          |          | 97.98    | 160   |       | 60       | 155      |        |
| 293 |         | 86       |          |          | 101.4167 | 160   |       | 70       | 331.25   |        |
| 294 |         | 86       |          | 135      | 195.96   | 200   |       | 125      | 187.5    |        |
| 295 |         | 175      |          |          | 128.92   |       |       | 30       | 62       |        |
| 296 |         | 172      |          |          | 115.51   |       |       | 100      | 103.75   |        |
| 297 |         |          |          |          | 283.3675 | 110   |       | 160      | 103      |        |
| 298 |         | 139.75   | 336      | 20       |          |       |       | 140      | 512      |        |
| 299 | 144.21  |          | 560      |          |          |       | 85    | 77.5     | 85.25    |        |
| 300 |         | 90       |          |          | 120.1525 |       |       | 42.5     | 125      |        |
| 301 | 144.17  |          |          | 20       | 84.57    | 277.5 |       | 50       | 123.6667 |        |
| 302 |         |          | 298.6667 |          | 123.76   |       |       | 180      | 187.5    |        |
| 303 |         |          | 240      | 20       |          |       | 220   | 110      | 137.5    | 54     |
| 304 |         |          |          |          | 123.76   |       |       | 57.5     | 265      |        |
| 305 |         | 40       | 137.3333 |          |          |       |       | 81.66666 | 212      |        |
| 306 |         |          |          | 30       | 165      |       |       | 100      | 108.3333 |        |
| 307 |         |          | 136.8889 |          |          |       | 400   | 84.44334 | 194.75   |        |
| 308 | 288.46  |          |          |          |          |       |       | 20       | 120.6667 |        |
| 309 |         | 40       |          |          | 371.29   |       |       | 350      | 116.25   |        |
| 310 | 200.31  |          |          |          |          |       | 25    | 140      | 100      |        |
| 311 |         |          |          |          |          |       | 190   | 175      | 50       |        |
| 312 |         |          |          |          |          |       |       | 40       | 187.5    |        |
| 313 | 1001.18 |          |          |          | 148.52   |       |       |          | 186      |        |
| 314 |         |          |          |          |          |       |       | 120      |          |        |
| 315 | 209.65  | 90       | 58.44445 | 4        |          |       |       |          | 93       |        |
| 316 | 200.31  | 105      | 80.2     | 30       | 128.92   |       |       |          | 55.8     |        |
| 317 |         | 184.5625 |          | 18       |          | 200   |       | 90       | 83.125   |        |
| 318 |         | 113      |          |          | 200.295  | 208.8 |       | 90       | 50       |        |
| 319 |         | 446      | 155.5556 | 22.65    | 74.26    | 162   |       | 24       | 120      |        |
| 320 |         |          | 111.1111 | 300      | 103.14   |       |       | 11.395   | 55.8     |        |
| 321 |         | 291.25   |          | 46.66667 | 150.985  |       |       | 60       | 118.1667 |        |
| 322 |         | 171      |          | 30       |          |       |       | 80       | 193.75   |        |
| 323 |         | 212.5    |          | 40       | 154.7    |       |       | 30       | 69.75    |        |
| 324 |         | 400      | 151.56   | 60       | 116.03   |       |       | 31.25    | 116.25   |        |
| 325 |         | 176.6667 | 131.56   | 20       | 386.76   |       |       | 31.25    | 135.625  |        |
| 326 |         |          |          |          | 74.26    |       |       | 75       | 72.375   | 100.07 |
| 327 | 144.23  | 86       |          |          | 185.6467 |       |       | 90       | 143.75   |        |

|     |        |          |          |          |          |          |         |          |          |       |
|-----|--------|----------|----------|----------|----------|----------|---------|----------|----------|-------|
| 328 | 144.23 | 277.05   |          | 40       | 371.29   |          |         | 90       | 125      |       |
| 329 | 75.48  |          |          |          | 99.01    | 159.375  |         |          |          |       |
| 330 |        |          |          |          |          | 191.25   |         |          |          |       |
| 331 | 144.13 | 200      | 112      |          | 111.84   |          |         |          |          |       |
| 332 |        |          |          | 24       | 154.7    |          |         | 75       | 116.25   |       |
| 333 |        | 205      |          |          | 74.26    |          |         | 40       | 77.5     |       |
| 334 | 251.58 | 265      |          |          |          | 330      |         |          |          |       |
| 335 |        |          |          |          | 330.04   |          |         |          | 125      |       |
| 336 |        | 114.0667 |          |          | 135.9667 |          |         | 90       | 140      |       |
| 337 |        | 193.6    |          |          | 166.05   |          |         | 100      |          |       |
| 338 |        | 88.16666 |          | 15.33    | 94.88    |          |         | 62.5     | 93.33334 | 80.38 |
| 339 |        |          |          |          |          |          |         | 80       | 112.5    |       |
| 340 |        |          |          | 64       |          |          |         | 93.33334 | 183.3333 |       |
| 341 | 144.23 | 117.2    |          | 20       | 121.185  |          |         | 120      | 137      |       |
| 342 | 144.41 | 93.6     |          | 10       | 98.495   |          |         |          | 120.125  |       |
| 343 |        |          | 264.4444 |          | 165.02   |          |         | 166.6667 | 187      |       |
| 344 |        |          | 186.6667 | 30       | 74.56    |          |         |          | 175      | 80    |
| 345 |        | 110      | 280      | 30       | 99.01    |          |         | 105      | 62       | 30.07 |
| 346 |        | 40       |          | 32       | 74.26    | 37.5     |         |          | 40.5     |       |
| 347 |        | 135      | 252.6    | 33.33333 | 50.645   |          |         | 95       | 144.6667 |       |
| 348 |        | 40       | 252.6    | 26.66667 |          |          |         | 77.5     | 121.4167 |       |
| 349 |        |          |          | 30       |          |          |         | 150      | 530      |       |
| 350 |        |          | 367.1111 |          |          | 500      |         | 60       | 212      |       |
| 351 | 144.17 |          |          |          |          |          | 219.64  |          | 212      |       |
| 352 | 181.77 |          |          | 24       |          |          |         |          | 106      |       |
| 353 |        | 195      | 186.6667 | 38.75    | 127.885  |          |         | 100      | 117      |       |
| 354 |        | 80       |          |          | 149.12   |          |         | 70       | 178      | 25.06 |
| 355 |        |          | 155.5556 | 40       | 116.03   |          |         | 65       | 262.5    |       |
| 356 |        |          |          | 30       | 108.98   | 80       |         | 115      | 100      |       |
| 357 |        | 86       | 112      | 54       | 222.78   |          |         | 120      | 477      |       |
| 358 |        |          | 112      | 30       |          |          |         | 70       | 143.75   |       |
| 359 |        |          | 186.6667 |          | 123.76   | 155      |         |          | 170      |       |
| 360 |        |          | 149.3333 |          | 86.635   | 370      |         |          | 170      |       |
| 361 |        |          | 373.3333 |          | 123.76   | 120      |         | 60       | 116.75   |       |
| 362 |        |          | 311.1111 |          |          | 190      | 131.745 | 60       | 85       | 50    |
| 363 |        |          |          | 40       | 74.26    |          |         | 120      | 246.6667 |       |
| 364 |        |          |          |          |          | 220      |         |          |          |       |
| 365 |        | 136.6667 |          |          |          |          |         | 100      | 175.6667 |       |
| 366 | 251.58 |          |          |          |          |          |         | 207.5    | 238.5    |       |
| 367 | 240.38 |          |          |          | 146.97   | 327.2833 |         | 60       | 71.66666 |       |
| 368 |        | 74.75    |          | 75       | 99.01    |          |         |          | 113      |       |



|     |        |          |          |       |          |        |        |       |         |       |
|-----|--------|----------|----------|-------|----------|--------|--------|-------|---------|-------|
| 410 |        |          |          | 75    | 135.4533 |        |        | 100   | 252.75  |       |
| 411 |        | 243.3333 |          | 40    | 148.81   |        |        | 25    | 75      |       |
| 412 |        | 324      | 254.63   | 200   | 345.505  | 304.4  |        | 85    | 125     |       |
| 413 |        |          |          |       | 99.01    |        |        |       | 212     |       |
| 414 |        |          |          |       | 99.01    |        |        |       | 424     |       |
| 415 | 480.56 |          | 384.16   | 94.45 | 123.76   |        |        |       | 101     |       |
| 416 |        |          |          |       |          |        |        |       | 200     | 120   |
| 417 |        |          |          |       |          |        |        | 172.5 | 530     |       |
| 418 |        |          |          |       |          | 160    |        |       |         | 38.35 |
| 419 |        | 65.5     |          | 30    |          |        |        | 56    | 62.5    |       |
| 420 |        | 116      |          | 20    | 66.01    |        |        | 20    | 125     |       |
| 421 |        | 79       |          | 25    | 266.09   |        |        | 28    | 127.25  |       |
| 422 | 251.58 |          |          | 10    | 99.00999 |        |        | 185.7 | 75      |       |
| 423 | 240.38 | 110      |          | 82    | 125.83   | 225    |        | 129.5 | 106     | 80.38 |
| 424 |        | 570      | 112      |       |          | 40     |        |       | 46.5    |       |
| 425 |        |          | 202.2222 |       | 247.53   |        |        |       | 200     |       |
| 426 |        |          |          | 30    | 92.82    |        |        |       | 115     |       |
| 427 |        |          |          | 20    |          |        |        |       | 201.5   | 31.96 |
| 428 |        |          | 368.37   |       |          | 411.84 |        |       |         |       |
| 429 |        | 75       |          |       | 99.01    |        |        | 80    | 97.5    |       |
| 430 | 240.38 |          | 186.6667 | 24    | 193.38   | 220    |        |       | 77.5    |       |
| 431 |        |          | 240      | 22    |          |        |        | 80    | 165.625 |       |
| 432 |        | 220      |          | 30    | 111.39   | 1100   |        |       |         |       |
| 433 |        | 155      |          | 50    | 128.92   |        |        | 70    | 10.75   |       |
| 434 |        |          |          |       | 78.385   |        |        | 100   |         |       |
| 435 | 150.95 |          |          | 48    | 99.215   |        |        | 100   | 215     |       |
| 436 |        |          | 112      |       |          |        |        | 60    | 129.5   |       |
| 437 | 300.47 |          | 224      | 40    | 88.18    |        |        | 105   | 294.25  |       |
| 438 | 503.17 |          |          | 50    |          |        |        | 132.5 | 250.75  |       |
| 439 |        | 108      |          | 40    | 64.46    |        |        | 100   | 124     |       |
| 440 |        |          |          |       | 123.76   |        |        | 20    | 62      |       |
| 441 |        |          |          | 30    |          |        |        | 230   | 58.125  |       |
| 442 |        |          |          | 20    | 99.01    |        |        | 120   | 212     | 70.13 |
| 443 |        |          |          |       | 222.775  |        |        | 90    | 92.75   | 70    |
| 444 |        |          |          |       | 247.53   | 330    |        | 340   | 269.875 |       |
| 445 |        |          | 280      |       | 247.53   |        |        | 125   | 636     |       |
| 446 |        |          |          |       | 99.01    |        | 400.69 | 280   | 200     |       |
| 447 |        |          |          |       | 99.01    |        | 200.34 | 150   | 100     | 90    |
| 448 |        |          |          |       | 123.76   | 220    |        | 40    | 62      |       |
| 449 |        |          |          | 30    | 148.52   |        |        |       | 265     |       |
| 450 | 240.36 | 117.3333 |          | 13.5  | 113.45   |        |        | 10    | 146.69  |       |

|     |        |          |          |          |          |       |        |        |          |       |
|-----|--------|----------|----------|----------|----------|-------|--------|--------|----------|-------|
| 451 |        | 140      |          |          |          | 220   |        |        | 445      |       |
| 452 |        |          | 112      |          |          |       | 76.87  | 60     | 112.5    |       |
| 453 |        |          |          | 22       |          |       |        | 105    | 105.9167 |       |
| 454 |        |          |          |          | 74.26    |       |        |        | 125      |       |
| 455 | 288.34 |          | 112      |          |          |       |        |        | 150      |       |
| 456 |        |          |          |          |          |       |        |        | 175      | 40    |
| 457 |        | 86       | 75       |          |          |       |        |        | 212      |       |
| 458 |        |          | 112      |          | 74.26    |       |        |        | 100      |       |
| 459 |        | 296.6667 |          |          |          | 320   |        | 30     |          |       |
| 460 | 148.85 | 105      |          |          | 206.27   |       |        |        | 65.66666 |       |
| 461 |        |          | 186.6667 |          |          | 220   | 300.51 |        |          |       |
| 462 |        |          |          |          |          | 220   | 200.34 |        |          |       |
| 463 |        | 214.6667 | 305.55   | 25       | 128.92   |       |        | 50     | 209      |       |
| 464 | 251.58 | 160      |          | 65       | 128.92   | 200   | 200.34 |        | 210.75   |       |
| 465 |        | 86       | 149.3333 |          |          |       |        | 40     | 31       |       |
| 466 |        | 150      |          |          |          |       |        |        |          |       |
| 467 |        |          |          |          |          |       |        | 118.5  | 170.5    |       |
| 468 |        |          |          | 25       |          |       |        |        | 50       |       |
| 469 |        | 172      | 186.6667 | 20.25    | 99.01    |       |        |        | 86.5     |       |
| 470 |        | 172      |          |          | 119.8925 |       |        | 71.25  | 62.16667 |       |
| 471 |        |          |          | 45       | 74.26    |       |        |        | 50       |       |
| 472 |        | 167.3333 | 210.34   | 50       | 87.57    | 159.5 |        |        |          |       |
| 473 |        |          |          | 25       | 46.41    |       |        |        | 112.5    |       |
| 474 |        | 130      |          | 25       | 156.77   | 220   |        | 100    | 156      |       |
| 475 |        | 140      |          | 12       |          |       |        | 40     | 106      |       |
| 476 |        |          |          |          | 136.655  | 280   |        | 60     | 112.75   |       |
| 477 |        |          |          | 20.25    |          |       |        | 20     | 124      |       |
| 478 | 39.51  | 97.198   |          | 28.32667 | 103.56   | 67.5  |        |        |          |       |
| 479 |        | 266.6667 |          |          |          |       |        | 160    | 62       |       |
| 480 |        | 80       | 186.6667 |          |          |       |        | 130    | 250      | 50    |
| 481 |        |          | 149.3333 | 5        |          | 320   | 185.12 | 30     |          |       |
| 482 |        | 206.4    |          |          |          |       |        | 60     | 187.5    |       |
| 483 |        |          | 373.3333 | 105      |          | 82.5  | 240.35 | 45     | 530      |       |
| 484 |        |          | 186.6667 |          |          |       |        |        | 150      |       |
| 485 |        |          | 126.81   |          | 109.075  | 75    |        | 25     | 100      |       |
| 486 |        | 40       |          | 10       | 290.7128 |       |        | 111.25 | 231.875  | 17.98 |
| 487 |        | 120      |          | 38       | 309.41   | 150   |        | 95     | 112.5    |       |
| 488 |        |          |          | 27.5     | 46.41    | 150   |        |        | 232.5    |       |
| 489 |        | 80       |          |          | 85.09    |       |        |        | 265      |       |
| 490 |        | 220      | 108.8889 |          | 123.76   |       |        |        | 278.25   |       |
| 491 |        |          |          | 40       | 99.01    |       |        |        | 186      | 49.75 |

|     |        |       |          |          |          |          |        |      |          |       |
|-----|--------|-------|----------|----------|----------|----------|--------|------|----------|-------|
| 492 |        |       | 186.6667 |          |          |          | 110.19 | 200  | 250      |       |
| 493 |        |       | 388.8889 |          |          |          |        | 142  | 156.25   | 49.86 |
| 494 |        |       | 186.6667 |          | 247.53   |          |        |      |          |       |
| 495 | 350.52 |       | 350      | 46.66667 |          | 360      |        |      |          |       |
| 496 | 503.17 |       |          | 9        | 100.1967 | 100      |        | 100  | 93.33334 |       |
| 497 |        |       |          |          |          |          |        | 40   | 125      |       |
| 498 |        |       | 373.3333 |          |          |          |        | 150  | 100      |       |
| 499 |        |       |          | 45       | 123.76   |          |        | 150  | 161.5    |       |
| 500 | 480.71 |       | 303.12   | 40       |          |          |        | 40   | 157      |       |
| 501 |        |       |          | 30       |          |          |        | 120  | 318      |       |
| 502 | 144.21 | 300   |          | 32.5     | 76.32    |          |        |      | 280.6667 |       |
| 503 | 144.21 | 45    |          | 20       | 163.295  |          |        |      | 114.8333 |       |
| 504 | 450.53 | 215   | 186.6667 | 30       | 82.51    | 208.8    |        |      | 126      |       |
| 505 |        |       |          |          | 99.01    | 304.4    | 622.98 |      |          |       |
| 506 |        |       | 251.58   |          |          | 220      |        |      |          |       |
| 507 |        |       |          |          | 74.26    |          |        |      |          | 31    |
| 508 | 176.92 |       |          |          |          |          |        | 49   | 62       |       |
| 509 |        | 86    | 186.6667 | 20       |          | 190      |        |      |          |       |
| 510 |        | 178   |          | 10       | 198.02   |          |        |      |          | 89    |
| 511 |        | 104.5 | 112      | 26.25    | 420.79   |          |        |      |          | 46.5  |
| 512 |        |       |          |          | 119.3033 | 80       |        | 50   | 139.5    |       |
| 513 |        | 40    | 112      |          | 99.42    |          |        |      |          | 50    |
| 514 |        |       |          |          |          |          |        |      |          | 58    |
| 515 |        | 77.5  |          |          | 554.6666 |          |        | 50   | 92.5     |       |
| 516 |        | 56    | 254.63   |          | 577.7778 |          |        | 62.5 | 200      |       |
| 517 | 188.69 | 262   |          | 118.625  | 149.12   |          |        | 94.8 | 108.5    |       |
| 518 |        |       | 186.6667 | 16       | 23.21    |          |        | 600  | 243      | 40    |
| 519 |        | 149.5 | 153.99   |          | 297.04   | 90       |        |      |          |       |
| 520 | 251.58 | 378   |          | 102      |          |          |        | 120  | 62       |       |
| 521 | 251.58 | 350   |          | 65       | 198.02   |          |        |      | 93       |       |
| 522 |        |       | 292.8445 |          | 244.09   | 200.97   |        | 175  | 400      |       |
| 523 |        |       | 186.6667 | 30       | 264.03   |          |        | 15   | 125      |       |
| 524 |        |       | 220.6483 |          | 107.6225 | 50       |        | 82.5 | 125      |       |
| 525 |        | 140   | 169.1133 | 30       | 95.915   |          |        |      | 100      |       |
| 526 |        |       |          |          | 309.41   | 144.1667 |        | 100  | 125      |       |
| 527 |        | 85    |          |          | 77.35    | 220      |        |      | 155      |       |
| 528 |        | 1080  | 186.6667 |          |          |          |        | 375  | 118.75   |       |
| 529 |        |       | 112      |          |          |          |        | 60   |          |       |
| 530 |        |       |          | 16       | 119.64   | 224      |        | 50   | 125      |       |
| 531 |        |       | 777.7778 |          |          | 340      |        | 30   | 212.5    |       |
| 532 |        | 147.5 | 112      | 60       |          | 280      |        |      | 175      |       |

|     |        |          |          |       |          |          |          |          |          |       |
|-----|--------|----------|----------|-------|----------|----------|----------|----------|----------|-------|
| 533 |        |          |          | 52.5  | 99.01    |          | 153.75   |          | 150      |       |
| 534 |        | 220      |          |       | 116.5    | 518.77   |          |          |          |       |
| 535 |        |          |          |       |          |          |          | 69.3     |          |       |
| 536 |        | 130      |          |       | 217.4767 |          |          |          | 118.8333 |       |
| 537 |        | 130      |          | 7.5   | 88.545   | 36       |          | 60       | 96.875   |       |
| 538 |        |          |          | 41    | 118.055  | 125      |          | 80       | 69.75    |       |
| 539 |        | 220      |          | 45    | 173.27   | 400.71   |          | 190      |          |       |
| 540 |        |          |          |       | 165.02   |          |          |          |          |       |
| 541 |        | 120      |          |       | 160.89   |          |          |          | 46.5     |       |
| 542 | 108.16 | 190.8333 |          | 24    | 272.89   | 196.6667 |          |          | 193.75   |       |
| 543 | 240.36 | 93.75    |          | 10.5  | 137.685  | 116.6667 |          |          |          |       |
| 544 |        | 115      |          |       | 120.175  |          |          | 90       |          |       |
| 545 |        |          |          |       | 48.735   |          | 95.14999 | 20       |          | 80.38 |
| 546 |        | 172      | 380.42   | 45    |          |          |          | 307.9733 | 99.125   |       |
| 547 |        |          | 186.6667 |       | 370.2978 |          |          | 96.74    | 68.5     |       |
| 548 |        | 200      |          | 30    | 253.715  | 165      |          | 100      | 104      |       |
| 549 |        | 180      | 280      | 55    |          |          |          | 77.5     | 167.9167 |       |
| 550 |        |          |          |       |          |          |          | 100      | 116.25   | 79.95 |
| 551 | 240.36 | 40       |          | 56.25 |          |          |          | 62.5     | 56.83333 |       |
| 552 |        | 140.5    | 149.3333 | 45    | 302.5367 |          |          | 15       | 290.625  |       |
| 553 |        | 40       |          |       | 123.76   | 86.4     |          |          |          |       |
| 554 | 480.42 | 176.6667 | 373.3333 | 50    | 151.27   |          |          |          | 135.625  |       |
| 555 |        |          |          | 45    |          |          |          |          | 375      |       |
| 556 |        | 155      |          | 35    |          | 208.8    |          |          | 75       |       |
| 557 |        | 276      |          | 140   | 82.51    |          |          |          |          | 84.57 |
| 558 | 150.95 | 162.5    |          | 80    | 129.45   | 880      |          | 96.875   | 625      |       |
| 559 |        | 220      |          | 60    | 57.895   | 385      |          | 91.66666 | 232.5    |       |
| 560 |        | 110.3333 |          | 25    | 221.225  |          |          |          | 95       |       |
| 561 |        | 137.5    |          | 20    | 110.19   |          |          |          | 188      |       |
| 562 |        |          |          |       |          |          | 219.64   | 200      | 100      |       |
| 563 | 240.38 |          | 213.88   | 54    |          |          | 109.82   | 72       | 95       |       |
| 564 |        |          |          | 23.2  | 116.03   |          |          | 96.66666 | 274.6667 |       |
| 565 | 251.58 |          |          |       | 165.02   |          |          |          |          |       |
| 566 |        |          |          | 55    | 198.025  |          |          | 112      | 172.25   |       |
| 567 |        | 47       |          |       | 132.01   |          |          |          | 95.4     |       |
| 568 |        | 310      | 314.9933 | 41.3  | 89.215   |          |          | 96.66666 | 232.5    |       |
| 569 |        | 165      |          | 26    | 241.64   |          |          | 75       | 119.1667 |       |
| 570 |        | 121.3333 |          | 25    | 141.81   | 193.52   |          | 80       | 171.125  |       |
| 571 |        | 195      |          |       | 259.9    | 190      |          |          | 116.25   |       |
| 572 |        |          | 253.61   |       | 116.8867 |          |          |          |          |       |
| 573 |        |          | 311.1111 | 18    | 268.16   |          |          | 85       | 188.75   |       |



|     |        |        |          |          |          |        |        |          |          |        |
|-----|--------|--------|----------|----------|----------|--------|--------|----------|----------|--------|
| 574 |        |        | 112      |          | 24.75    |        |        | 100      | 93       |        |
| 575 | 144.23 | 75.25  |          |          | 38.68    | 250    |        | 73.33334 | 139.5    |        |
| 576 | 120.14 | 242.11 |          | 30       | 80.575   |        |        |          | 80       |        |
| 577 |        | 40     |          |          | 38.68    |        |        |          | 125      |        |
| 578 |        | 83     |          | 38       | 225.87   |        |        | 85       | 139.5    | 75.4   |
| 579 | 72.11  |        |          | 10       | 261.88   | 210    |        | 43       | 187.5    |        |
| 580 |        |        |          | 0.35     | 111.385  |        |        | 66.66666 | 145.1    |        |
| 581 |        |        |          | 45       | 130.465  |        |        | 90       | 139.5    |        |
| 582 | 350.41 | 125    | 212.19   | 40.33333 | 99.01    | 190    |        | 215      | 93.75    | 42.98  |
| 583 |        | 399    | 140      | 32.5     | 132.01   |        |        | 72       | 132.5    | 41.24  |
| 584 |        | 86     |          | 20       | 248.54   |        |        | 20       | 77.5     |        |
| 585 | 21.33  | 197.5  |          | 50       | 99.01    |        |        | 125      | 193.75   |        |
| 586 | 144.06 | 180    |          | 26       | 149.125  |        |        |          | 151      |        |
| 587 |        | 40     |          |          | 99.01    |        |        | 100      | 187.5    |        |
| 588 |        | 40     | 186.6667 |          | 99.01    |        |        | 80       | 62.5     |        |
| 589 |        | 600    |          |          | 515.68   |        |        |          | 125      |        |
| 590 | 71.12  |        |          | 15       | 103.14   |        |        |          | 193.75   | 40     |
| 591 |        | 110    | 254.63   | 70       | 198.02   | 110    |        |          | 130.75   |        |
| 592 |        | 340    |          |          | 198.025  | 100    |        | 11       |          |        |
| 593 |        |        | 373.3333 | 40       | 74.26    |        |        | 42.5     | 266.6667 |        |
| 594 | 153.71 |        | 149.3333 | 30       | 132.55   |        | 100.04 | 160      | 58.13    | 28.995 |
| 595 | 300.27 | 270    |          | 41.94    | 160.515  |        |        | 93.33334 | 79.5     |        |
| 596 |        | 143.75 |          |          |          | 104    |        | 104.5    | 77.5     |        |
| 597 |        |        |          |          | 123.76   | 72     |        |          | 150      |        |
| 598 |        |        | 186.6667 | 67.5     | 123.76   |        |        |          | 156.25   |        |
| 599 |        | 180    | 93.33333 | 18       | 123.76   |        |        | 125      | 88.75    |        |
| 600 |        | 132.5  |          | 55       | 77.35    |        |        | 80       | 212      |        |
| 601 |        |        |          |          |          |        |        | 52.5     |          |        |
| 602 |        |        |          |          | 206.27   |        |        |          |          |        |
| 603 |        |        | 112      |          | 222.77   |        | 249.28 | 66       |          |        |
| 604 |        | 216    |          |          |          | 156.6  |        | 248.48   | 200      |        |
| 605 |        |        |          |          | 99.01    | 160    |        | 100      | 62       |        |
| 606 |        |        |          |          |          | 206.25 | 154.25 | 300      | 187.5    |        |
| 607 |        | 110    |          | 143      | 101.7867 | 50     | 153.99 | 150      | 125      | 109.98 |
| 608 |        |        | 186.6667 | 10       | 123.76   |        |        | 100      | 125      |        |
| 609 |        |        | 280      |          |          |        |        |          | 150      |        |
| 610 |        | 155    |          | 40       | 248.54   |        | 100.17 |          | 73       |        |
| 611 |        |        |          |          | 248.54   |        |        |          | 106      |        |
| 612 |        |        |          |          |          |        |        | 80       | 46.5     |        |
| 613 |        |        |          |          |          |        |        | 26.25    | 356      |        |
| 614 |        |        | 224      | 20       | 99.01    |        |        |          | 31       |        |



|     |         |          |        |          |          |       |        |          |          |       |
|-----|---------|----------|--------|----------|----------|-------|--------|----------|----------|-------|
| 656 |         |          |        | 40       | 247.53   |       |        | 350      | 174.38   |       |
| 657 | 480.76  | 270      |        | 31       | 247.53   |       |        | 180      | 159      |       |
| 658 |         |          |        |          | 184.27   | 220   |        | 135      | 31       |       |
| 659 | 240.21  | 110      |        | 32       | 126.605  | 100   |        | 70       | 143.5    | 87.31 |
| 660 |         | 135      |        | 30       | 99.01    |       |        | 150      | 212      |       |
| 661 |         |          |        |          | 103.14   |       |        | 150      | 106      |       |
| 662 | 209.65  | 175      |        | 110      | 99.42    |       |        |          | 150      |       |
| 663 | 250.38  | 98       |        | 50       | 99.57    | 208.8 |        |          | 92.75    |       |
| 664 | 240.38  | 173.75   |        |          | 99.01    |       | 100.17 |          | 125      |       |
| 665 |         | 95       |        |          | 99.42    |       |        |          | 150      |       |
| 666 |         | 150      |        |          | 99.42    |       |        |          | 200      |       |
| 667 |         | 133.7    |        |          | 126.855  |       |        | 75       | 140      |       |
| 668 |         |          |        | 24.66667 |          |       |        | 100      | 97.5     |       |
| 669 | 131.03  |          |        |          | 55.86666 |       |        | 80       | 50.83333 |       |
| 670 |         |          |        | 30       | 334.16   | 110   |        |          | 50       |       |
| 671 |         |          | 503.17 |          | 258.265  |       |        | 55       |          |       |
| 672 |         | 220      |        |          | 247.53   | 400   |        |          |          |       |
| 673 |         |          |        |          |          |       |        | 35       | 218.75   |       |
| 674 |         |          |        |          | 38.68    |       |        |          | 62.5     |       |
| 675 |         |          |        |          | 160.895  |       |        | 80       |          | 45    |
| 676 |         |          |        |          | 165.02   |       |        | 15       | 500      |       |
| 677 | 245.895 | 235      |        | 13.33333 | 148.52   |       |        | 100      | 112.5    |       |
| 678 |         |          | 224    | 200      | 74.26    |       |        | 150      |          |       |
| 679 | 200.24  | 115      |        |          | 309.405  |       |        |          |          |       |
| 680 |         |          |        | 27.5     |          |       |        | 30       | 37.5     |       |
| 681 |         | 64.25    |        |          |          |       |        |          | 110.8333 | 30    |
| 682 |         |          |        |          |          |       |        | 100      | 376.6667 |       |
| 683 |         | 65       |        | 20       | 549.8222 |       |        |          | 38.76    |       |
| 684 | 219.625 | 131.25   |        |          | 132.01   |       |        |          | 156.25   |       |
| 685 | 288.34  |          |        |          | 99.01    |       |        |          | 218.75   |       |
| 686 | 144.15  |          |        | 20       | 66.01    |       |        |          | 68.75    |       |
| 687 |         | 86       |        | 56.66667 | 132.01   |       |        | 100      | 95.83334 |       |
| 688 |         | 40       |        | 29       | 131.09   | 380   |        | 57.33333 | 93       |       |
| 689 |         |          |        | 6.66     | 165.02   |       |        | 47       | 45.22    |       |
| 690 |         | 86       |        | 24       | 115.51   |       |        | 69.33334 | 37.5     |       |
| 691 |         | 86       |        | 17.5     | 99.01    |       | 200.34 | 22.5     | 59.375   |       |
| 692 |         |          |        |          | 107.7    |       |        | 100      | 75       |       |
| 693 |         | 148.6667 |        | 35       | 99.42    |       |        |          | 62.5     |       |
| 694 | 144.27  | 113      |        | 33       | 235.0733 | 360   | 100.17 | 180      | 155      |       |
| 695 |         | 52.5     |        | 28       | 187.19   | 320   | 200.34 | 225      | 387.5    |       |
| 696 |         | 245      |        | 30       | 128.92   |       |        | 125      | 200      |       |

|     |          |          |          |        |          |     |        |          |         |       |
|-----|----------|----------|----------|--------|----------|-----|--------|----------|---------|-------|
| 697 |          | 206      |          |        | 259.91   |     |        | 30       | 23.25   |       |
| 698 |          | 198      |          | 16     | 207.99   |     | 113.19 | 45       | 165     | 70.33 |
| 699 |          | 112.5    | 229.16   | 35     | 284.6567 |     |        | 160      | 93      |       |
| 700 |          | 124      |          | 40     | 83.88667 | 270 |        | 125      | 76.25   | 10    |
| 701 |          |          |          |        | 123.7667 |     |        |          | 116.26  |       |
| 702 |          | 55       |          | 20     | 198.83   |     |        |          | 62      |       |
| 703 |          |          |          |        | 577.7778 |     |        | 80       | 124.5   |       |
| 704 |          |          |          |        | 198.43   |     |        | 100      | 58.13   |       |
| 705 |          | 96.875   |          | 20     | 222.775  |     |        | 80       | 89.375  |       |
| 706 |          |          |          | 10     | 222.78   | 400 |        | 70       |         |       |
| 707 |          | 202.3333 |          |        | 203.6925 |     |        | 150      | 150     |       |
| 708 |          |          |          |        | 99.01    | 400 |        |          |         |       |
| 709 |          | 180      |          |        | 112.93   |     |        |          | 187.5   | 23.97 |
| 710 |          |          | 168      |        | 148.52   |     |        | 41.75    | 75      |       |
| 711 |          | 178      | 62.22222 | 20     | 165.015  |     |        |          | 125.875 |       |
| 712 |          | 131      | 466.6667 |        | 247.53   |     |        | 86.66666 | 201.5   |       |
| 713 |          | 130      |          | 146    | 128.92   |     |        |          | 106     |       |
| 714 |          | 105      |          | 25.75  |          |     |        | 60       | 116.25  |       |
| 715 |          | 146      | 210.5    | 90     | 226.9    | 80  |        |          | 79.5    |       |
| 716 |          | 235      | 186.6667 | 130    |          |     |        | 70       |         |       |
| 717 | 150.95   |          |          |        |          |     |        | 100      | 210     |       |
| 718 |          | 40       |          |        | 88.18    |     |        | 65       | 148.6   |       |
| 719 |          |          |          | 30     |          |     |        |          | 106     |       |
| 720 |          | 170      |          |        | 99.01    |     |        | 40       | 69.75   |       |
| 721 |          |          |          | 95     | 49.51    |     |        | 100      | 331.25  |       |
| 722 |          |          |          |        | 63.43    | 400 |        | 32.5     | 84      |       |
| 723 |          |          |          |        | 128.92   |     |        |          | 424     |       |
| 724 |          |          | 186.6667 |        | 163.01   |     |        | 115      | 274.5   |       |
| 725 |          |          |          |        | 77.35    |     |        | 300      | 212     |       |
| 726 |          | 40       |          |        | 128.92   |     |        |          | 31      |       |
| 727 | 219.07   |          | 448      | 10     |          |     |        | 56       | 106     |       |
| 728 |          | 86       |          | 5      | 174.98   |     |        | 50       | 135.625 |       |
| 729 | 215.7767 | 169.75   |          |        | 148.79   |     |        | 20       | 90.5    |       |
| 730 |          | 119      |          |        |          |     |        |          | 93.75   |       |
| 731 |          | 80       |          | 24.835 |          |     |        |          | 156.35  |       |
| 732 |          |          |          | 6      | 128.92   |     |        | 102      | 100     |       |
| 733 | 150.95   | 40       |          |        |          |     |        | 80       | 139.5   |       |
| 734 |          | 180      |          | 20     | 198.02   | 60  |        | 200      |         |       |
| 735 |          |          | 224      |        | 148.52   |     |        | 160      | 387.5   |       |
| 736 |          | 180      |          | 27     | 74.26    |     |        | 100      | 116.25  |       |
| 737 |          |          |          | 54.5   | 1155.556 |     |        |          | 47.5    |       |

|     |        |          |          |          |          |     |          |          |        |
|-----|--------|----------|----------|----------|----------|-----|----------|----------|--------|
| 738 |        | 133.4    |          | 50.66667 | 503.7037 |     |          | 189.875  |        |
| 739 | 144.23 |          | 168      |          | 99.01    |     |          | 137.3333 |        |
| 740 |        |          |          | 34.5     | 198.5556 |     | 70       | 139.5    |        |
| 741 | 125.19 | 260      |          | 60       | 248.54   |     | 30       | 200      |        |
| 742 | 480.71 | 155      |          | 45       | 99.42    |     | 60       | 250      |        |
| 743 |        | 140      |          | 66.25    | 132.0133 |     | 96.66666 | 135.4167 |        |
| 744 |        |          | 252.6    |          | 37.13    |     |          | 112.5    |        |
| 745 |        |          |          |          | 403.88   |     |          | 38.75    | 199.39 |
| 746 |        | 152.375  |          |          | 123.76   |     | 98.33334 | 124.5    |        |
| 747 | 721.13 |          | 186.6667 | 60       |          |     | 150      | 125      |        |
| 748 | 300.35 | 256.6667 |          | 40       | 198.025  |     | 147      | 141.625  |        |
| 749 |        | 102.5    |          | 35.5     | 112.7633 |     | 40       | 188.5833 | 261.13 |
| 750 |        |          |          |          | 143.355  |     | 117.5    |          |        |
| 751 |        |          |          | 50       |          |     | 805      | 62       |        |
| 752 |        |          |          | 57       | 99.01    |     | 50       | 187.5    |        |
| 753 | 360.57 | 100      |          |          | 221.355  | 260 | 592      | 62       | 160.75 |
| 754 |        |          |          |          | 128.92   |     | 200      | 318      |        |
| 755 |        |          |          |          | 198.02   |     | 35       | 125      |        |
| 756 | 572.8  |          |          | 20       | 77.35    | 120 |          | 212      |        |
| 757 |        | 220      | 373.3333 | 27       | 99.01    |     | 100      | 212      | 79.95  |
| 758 |        |          |          |          |          |     | 150      | 187.5    |        |
| 759 |        |          |          | 90       | 297.04   |     |          | 250      |        |
| 760 |        | 135      |          | 25       | 132.0167 | 350 | 70       | 187.5    |        |
| 761 |        | 180      |          |          | 194.17   |     | 270      | 125      |        |
| 762 |        |          |          |          | 222.7725 |     |          | 128.23   |        |
| 763 |        | 86.5     |          | 28.75    | 125.83   |     |          | 124      |        |
| 764 |        | 125      |          | 45       |          |     | 100      | 93       |        |
| 765 |        |          |          |          | 123.76   |     |          | 125      |        |
| 766 |        |          |          |          | 123.76   |     |          | 62.5     |        |
| 767 |        |          |          | 37       |          | 110 | 150      | 342.5    | 110    |
| 768 |        |          | 186.6667 |          |          |     | 150      |          |        |
| 769 |        |          |          |          |          |     |          | 25       |        |
| 770 |        | 150      |          |          | 123.76   |     |          |          |        |
| 771 |        |          |          | 50       |          | 400 |          | 150      |        |
| 772 |        | 450      |          | 60       | 148.52   | 110 | 60       | 106      |        |
| 773 |        |          |          |          | 99.01    |     |          |          |        |
| 774 | 240.36 |          |          | 40       | 99.01    |     |          | 125      |        |
| 775 |        |          | 480      | 24       | 154.7    |     | 540      | 150      | 31.96  |
| 776 |        |          |          |          |          | 250 | 180      | 93       |        |
| 777 |        |          | 186.6667 |          | 68.35    | 240 | 92.5     |          |        |
| 778 |        |          | 151.56   | 20.25    | 80.25999 |     | 75       | 103      |        |

|     |        |          |          |  |          |          |          |          |          |        |
|-----|--------|----------|----------|--|----------|----------|----------|----------|----------|--------|
| 779 |        |          |          |  | 148.52   |          |          | 120      | 200      |        |
| 780 |        |          |          |  |          |          |          | 117.6667 | 106      |        |
| 781 |        |          | 186.6667 |  |          |          | 204.7    | 150      | 125      |        |
| 782 |        |          |          |  | 247.53   |          |          | 150      | 187.5    |        |
| 783 |        |          |          |  | 77.35    |          |          | 200      | 154.5    |        |
| 784 |        |          |          |  | 148.52   |          |          | 56.75    | 125      |        |
| 785 |        | 515      |          |  | 37.33333 |          |          |          | 187.5    |        |
| 786 |        |          |          |  | 32       |          |          |          | 125      |        |
| 787 |        | 230      |          |  | 123.76   | 440      | 100.17   |          |          | 100    |
| 788 |        | 150      |          |  | 22.5     | 63.43    | 320      | 155      | 318      |        |
| 789 |        | 100      |          |  |          | 207.12   |          |          |          |        |
| 790 | 245.97 | 253      |          |  | 40       | 412.54   |          | 153.3333 | 200      |        |
| 791 |        | 86       |          |  | 6        | 148.52   |          | 68.5     |          |        |
| 792 | 190.22 | 51.66667 |          |  |          | 128.92   |          | 195      | 253.3333 |        |
| 793 | 240.38 | 110      |          |  | 27       | 800      | 160      | 150      |          |        |
| 794 |        |          |          |  | 40       | 99.01    |          | 100      | 99       |        |
| 795 |        | 52.5     |          |  | 35       | 153.878  |          | 120      | 262      |        |
| 796 | 144.21 |          | 56       |  | 180      |          |          |          | 205.9167 |        |
| 797 |        | 141.6667 |          |  | 25       | 120.3267 |          |          | 93       |        |
| 798 |        | 458.3333 |          |  |          | 278.47   |          | 120      | 465.12   |        |
| 799 |        |          |          |  |          | 38.095   |          | 150      | 81       | 143.74 |
| 800 | 288.34 |          |          |  | 30       | 148.52   |          | 100      | 73       |        |
| 801 |        | 110.5    |          |  |          | 131.2425 |          | 20       | 144.75   |        |
| 802 |        | 143      |          |  |          | 86.635   |          |          | 93       |        |
| 803 | 160.14 | 143      |          |  | 32       | 151.915  |          | 100      | 108.3333 |        |
| 804 |        |          | 209.65   |  |          |          | 100.17   | 100      | 93       | 10     |
| 805 |        | 190      |          |  | 15       | 37.13    | 95.14999 | 80       | 116.25   |        |
| 806 |        |          |          |  |          |          |          | 140      | 200      |        |
| 807 |        |          |          |  |          |          |          | 140      | 100      |        |
| 808 | 240.36 |          | 154.3    |  | 30       | 233.2725 |          | 60       | 196.625  |        |
| 809 | 240.36 | 80       | 182.3    |  | 30       | 113.965  | 208.8    | 60       | 208      |        |
| 810 | 71.12  | 155      |          |  | 10       |          |          | 45       | 81.375   | 97.5   |
| 811 | 157.24 |          | 317.02   |  | 10       |          |          |          |          | 84.57  |
| 812 |        | 92       |          |  | 100      | 110.0967 |          |          | 113.0833 |        |
| 813 |        | 203      |          |  | 56       | 50.54    |          |          | 91.75    |        |
| 814 |        | 120      | 112      |  |          | 117.5733 |          | 123      | 247.3333 |        |
| 815 | 721.09 | 40       |          |  | 30.25    | 148.52   | 79.6     | 175      | 185.5    |        |
| 816 |        | 405      | 171.1111 |  | 20       | 115.5133 | 75       | 30       | 75       | 100    |
| 817 |        |          |          |  |          | 123.76   |          | 192.5    |          |        |
| 818 |        | 190      |          |  |          | 99.01    |          |          | 25       |        |
| 819 | 314.48 |          |          |  | 129.0533 |          | 100.17   | 200      | 342.5    | 107.72 |

|     |          |          |          |          |          |          |         |          |          |        |
|-----|----------|----------|----------|----------|----------|----------|---------|----------|----------|--------|
| 820 |          | 120      |          |          |          |          |         |          |          | 92     |
| 821 |          | 120      |          | 38.5     | 148.52   |          |         | 75       | 124      |        |
| 822 |          | 180      | 220.1383 |          | 181.52   | 380      |         | 340      | 150      |        |
| 823 |          | 75       |          |          | 211.61   | 406.6667 |         | 160      |          |        |
| 824 |          | 262.5    |          | 27       | 123.7625 | 50       |         | 135      | 73.25    |        |
| 825 | 292.77   |          |          | 110      | 248.0425 |          |         | 50       | 116.5    |        |
| 826 |          | 92.83334 |          | 27.75    | 191.8325 |          |         | 180      | 50       |        |
| 827 | 244.025  | 90       |          |          | 123.76   |          |         | 37.5     |          |        |
| 828 |          | 172      |          |          | 396.04   |          |         | 120      | 125      | 482.26 |
| 829 |          |          |          | 60       |          | 561.6    |         | 15       | 155      |        |
| 830 |          | 165      |          | 60       | 198.2267 | 100      |         |          | 96.5     |        |
| 831 |          | 77.16666 |          |          | 99.01    |          |         |          | 106      |        |
| 832 | 150.95   |          |          | 30       | 198.02   | 468      |         | 75       |          | 16     |
| 833 |          |          |          |          |          |          | 127.035 | 90       | 212      |        |
| 834 | 251.58   | 195      |          | 30       | 148.515  |          |         | 63.75    | 100      |        |
| 835 |          | 78.75    |          | 23.83    | 192.6175 |          |         | 225      | 168.75   |        |
| 836 |          | 445      |          |          | 297.64   |          |         | 130      | 79.5     |        |
| 837 |          | 296.4167 |          |          | 561.4814 |          |         |          | 123.69   |        |
| 838 |          | 106.5    |          | 20       | 149.12   |          |         | 30       | 125      |        |
| 839 |          | 265      |          |          | 103.14   |          |         | 98.33334 | 279      |        |
| 840 |          |          | 178.6667 | 13       | 103.14   |          |         | 91.25    | 234      | 135    |
| 841 |          | 170      |          |          | 93.51334 |          |         | 25       | 186      |        |
| 842 |          | 92.33334 |          | 25.33333 | 74.93    |          |         | 86.66666 | 92.875   |        |
| 843 |          | 70       |          | 76       | 74.26    |          |         | 50       | 73       |        |
| 844 | 240.21   | 285      |          | 50       | 99.01    |          |         | 10       | 137.5    |        |
| 845 | 277.42   |          |          | 20       | 515.68   |          |         | 150      | 187.5    |        |
| 846 |          | 455      |          |          | 149.12   |          |         | 80       | 125      |        |
| 847 |          | 223      |          |          | 286.5133 |          | 90.13   |          | 62.5     |        |
| 848 | 486.94   |          |          |          | 97.865   |          |         |          |          |        |
| 849 | 384.57   |          |          | 32       | 148.52   |          |         | 113.3333 | 125      | 50     |
| 850 |          |          |          |          |          |          |         | 90       | 250      | 25     |
| 851 |          |          |          |          | 99.01    |          | 130.22  |          | 100      |        |
| 852 |          | 200      |          |          | 77.35    |          |         | 112.5    | 248      |        |
| 853 |          |          |          |          |          |          |         |          | 42.5     |        |
| 854 |          |          |          |          | 173.7875 |          |         |          | 66.66    |        |
| 855 |          | 306.25   |          | 60       | 193.38   |          |         | 7.5      | 50       | 80.38  |
| 856 | 229.6333 | 110      | 224      |          | 162.1825 |          |         | 50       | 194.7933 |        |
| 857 |          | 758      |          |          | 113.965  | 60       |         | 80       | 100      |        |
| 858 | 251.58   |          |          | 30       | 148.92   | 123.15   |         | 18       | 126.2933 |        |
| 859 |          |          |          |          |          |          |         | 84       | 250      |        |
| 860 | 75.12    | 215      |          |          | 193.38   |          |         | 10       |          | 29.95  |

|     |        |       |          |          |          |       |        |          |          |       |
|-----|--------|-------|----------|----------|----------|-------|--------|----------|----------|-------|
| 861 | 240.33 | 154   |          |          | 227.415  | 82.5  |        |          | 125      |       |
| 862 | 144.2  | 155   |          |          |          | 55    |        |          | 101.25   |       |
| 863 |        |       | 233.3333 | 45       | 99.01    | 182   |        | 30       |          | 75    |
| 864 | 240.28 |       |          | 40       | 247.53   |       |        | 150      | 125      |       |
| 865 |        |       |          | 24       | 99.01    | 275   |        | 131.6667 | 137.0325 |       |
| 866 |        | 90    | 186.6667 | 50       |          |       |        | 105      | 187.5    |       |
| 867 |        | 42    | 233.3333 | 23.13    | 577.7778 |       |        | 116.65   | 153.125  | 7.99  |
| 868 |        | 172   |          |          |          |       |        | 300      | 125      |       |
| 869 |        | 125   |          |          | 495.05   |       |        |          | 112.5    |       |
| 870 |        |       |          |          |          |       |        | 150      | 125      |       |
| 871 | 560.84 | 87.5  |          |          |          |       |        |          | 424      |       |
| 872 | 240.36 | 270   |          |          | 194.17   |       |        | 160      | 194.725  |       |
| 873 |        |       | 256.66   | 16       | 247.53   |       |        | 100      |          |       |
| 874 |        |       | 112      | 45       | 119.635  |       |        |          | 97.5     |       |
| 875 |        |       |          |          | 247.53   |       |        |          | 100      |       |
| 876 |        |       |          | 60       | 99.01    |       |        | 355      | 93.75    |       |
| 877 | 240.36 | 302   |          |          | 248.135  | 220   |        | 180      | 38.76    |       |
| 878 |        |       |          | 60       | 74.56    |       |        | 45       | 198.75   |       |
| 879 |        |       |          | 60       |          |       |        | 17.815   | 79.5     |       |
| 880 |        |       | 112      | 30       | 132.01   |       | 250.09 |          | 46.88    |       |
| 881 |        |       |          | 62.5     | 148.515  |       |        | 130      | 239.065  | 100   |
| 882 |        |       |          |          | 99.01    |       |        | 200      | 159      | 100   |
| 883 |        | 133   |          |          | 193.38   |       |        |          | 62       |       |
| 884 |        | 180   |          |          |          |       |        |          | 100      |       |
| 885 | 251.58 | 86    |          | 63.33333 | 198.53   | 150   |        |          | 93       |       |
| 886 |        |       | 88.88889 |          |          |       |        | 40       | 159      | 31.96 |
| 887 |        | 86    | 233.3333 |          | 99.01    |       |        |          | 212      |       |
| 888 |        | 180   |          | 68.4     | 77.35    |       |        | 295      | 106      |       |
| 889 | 251.58 |       |          | 20       | 128.92   |       |        | 105      | 93       |       |
| 890 |        |       |          |          |          |       |        | 45       |          |       |
| 891 | 240.38 | 60    |          | 90       |          | 150   |        | 80.16    | 166.6667 |       |
| 892 |        |       | 112      | 10       | 103.14   | 300   |        | 20       | 212      |       |
| 893 |        |       | 224      | 10       | 148.52   | 300   |        | 35       | 212      |       |
| 894 |        |       |          | 28       | 37.13    |       |        | 155.5    | 115      |       |
| 895 |        |       |          | 34.5     | 74.26    |       |        | 48       | 108.125  |       |
| 896 |        |       |          |          |          |       |        | 60       | 62       |       |
| 897 |        | 207.5 |          |          | 103.14   | 400   |        | 100      | 212      |       |
| 898 |        |       | 140      | 80       | 169.145  |       |        | 100      | 147.6667 |       |
| 899 | 209.65 |       | 112      | 30       | 112.415  |       | 77.12  | 180      | 166.3333 |       |
| 900 |        |       |          | 15       | 74.26    |       |        |          | 50       |       |
| 901 |        |       |          |          | 136.91   | 169.8 |        |          | 132.5    |       |



|     |          |          |          |          |          |          |          |          |          |         |
|-----|----------|----------|----------|----------|----------|----------|----------|----------|----------|---------|
| 902 |          |          |          |          | 118.295  |          |          |          | 90.66666 |         |
| 903 |          |          |          |          | 231.02   | 110      |          | 96       | 77.33334 |         |
| 904 |          |          |          |          | 64.46    |          | 270.39   | 60       | 100      |         |
| 905 |          | 266      | 253.61   |          | 132.01   |          | 95.14999 | 80       | 112.5    |         |
| 906 |          |          |          |          | 105.885  | 100      |          | 40       | 206.25   |         |
| 907 |          |          |          |          | 231.02   |          |          | 164      | 75       |         |
| 908 | 628.96   | 140      |          | 54.83333 | 206.61   | 206.65   |          | 50       | 116.25   |         |
| 909 |          |          |          | 30       | 297.64   |          |          |          | 124      |         |
| 910 |          |          |          | 40       | 149.0325 |          |          | 10       | 124      |         |
| 911 |          |          |          | 60       | 149.0325 |          |          | 10       | 139.5    |         |
| 912 |          |          | 112      | 20       | 74.26    |          |          | 100      | 116.25   |         |
| 913 | 232.715  |          |          | 20       | 77.35    |          |          | 140      | 120.1    | 116.53  |
| 914 |          | 220      |          | 40       | 148.52   |          |          |          | 100      |         |
| 915 |          | 146      |          | 9        |          |          |          |          | 119.25   | 20      |
| 916 |          | 430      | 355.055  | 20       |          |          |          | 90       | 124      |         |
| 917 |          |          |          | 30       |          |          | 249.28   | 104      | 75       | 49.975  |
| 918 |          |          |          |          |          |          |          |          |          |         |
| 919 |          | 180      | 254.63   |          |          |          |          | 45       | 116.25   | 94.78   |
| 920 |          |          |          |          | 247.53   |          |          |          |          | 40.98   |
| 921 |          | 150      |          | 100      | 202.1433 |          |          | 125      | 243.75   |         |
| 922 |          | 560      |          | 60       | 216      |          |          | 60       | 100      |         |
| 923 |          | 40       |          |          | 194.17   |          |          | 21       | 21       |         |
| 924 |          | 95       |          | 16.66    |          |          |          | 25       | 62       |         |
| 925 | 366.89   | 60       |          | 10.27667 | 93.22    | 224.77   |          | 64.96    | 96       | 10      |
| 926 |          | 55       |          | 60       |          |          |          |          | 212      |         |
| 927 |          | 100.6667 |          | 37.5     | 117.575  |          | 130.22   | 37.5     | 176.375  |         |
| 928 | 251.58   | 105      |          |          | 473.3333 | 67.5     |          |          |          |         |
| 929 |          | 184.4    |          | 24       |          | 167.8667 |          | 80       |          | 120.565 |
| 930 |          | 40       | 93.33333 | 60       | 132.01   |          |          | 185      | 187.5    | 154.515 |
| 931 |          | 90       |          |          | 436.8933 |          |          | 120      | 185.5    | 40      |
| 932 |          | 180      |          | 20       | 706.6666 |          |          | 56       | 105      |         |
| 933 | 169.2167 | 110.3333 |          | 22.5     | 99.21333 | 85       |          | 47.5     | 82.66666 |         |
| 934 |          |          |          | 15       |          | 220      | 414.6    | 95       | 185      |         |
| 935 | 240.38   | 40       |          | 31.66667 |          | 110      | 276.4    | 90       | 92.5     |         |
| 936 |          | 263      |          | 24       | 193.38   |          |          | 75       | 137      |         |
| 937 |          |          |          | 86.5     | 247.53   | 340      |          |          | 106      |         |
| 938 | 144.23   |          |          | 87.5     | 309.41   | 144.4    |          | 100      | 248.75   | 90      |
| 939 |          |          | 67.47    | 50       | 96.69    | 221.85   |          | 123.75   | 150      |         |
| 940 | 240.38   |          |          |          | 144      | 183.3333 |          |          |          |         |
| 941 | 240.38   |          |          |          | 247.53   | 346.6667 |          | 73.33334 |          |         |
| 942 | 240.28   | 338      |          | 30       | 185.64   |          |          | 150      | 240      |         |

|     |          |          |          |          |          |        |         |          |          |          |
|-----|----------|----------|----------|----------|----------|--------|---------|----------|----------|----------|
| 943 |          | 250      | 186.6667 | 25.875   | 148.52   |        |         | 100      | 219.5    |          |
| 944 |          |          |          |          |          |        |         | 300      | 93       |          |
| 945 |          |          | 168      | 40       | 111.69   | 340    |         | 100      |          |          |
| 946 | 243.47   | 95       |          | 56       | 99.215   |        |         | 500      | 57.94    |          |
| 947 |          | 175      |          | 37.5     |          | 112.5  |         | 75.75    | 118.8333 |          |
| 948 |          |          |          |          |          |        |         | 60       |          | 78.225   |
| 949 |          | 100      |          |          | 51.57    |        |         | 116.6667 | 137.3333 |          |
| 950 |          |          |          | 16       | 74.26    | 220    |         | 80       |          |          |
| 951 |          |          | 112      | 49       | 38.68    |        |         | 150      | 162.7933 |          |
| 952 |          | 103.2    | 373.3333 |          | 148.5133 |        |         | 135      | 103      |          |
| 953 |          |          |          | 8        |          |        |         | 100      | 125      |          |
| 954 |          | 130      |          | 20       | 466.02   |        |         | 250      | 62.5     |          |
| 955 |          | 180      |          |          |          |        |         |          | 116.25   |          |
| 956 |          | 450      |          | 90       | 99.01    |        |         |          | 150      |          |
| 957 | 144.17   | 110      |          | 39.6     |          |        |         | 20       | 46.5     |          |
| 958 |          |          |          | 80       |          |        |         |          | 62.5     |          |
| 959 |          |          | 253.61   |          | 206.27   |        |         | 80       | 196.5833 |          |
| 960 | 144.23   |          |          |          | 49.51    |        |         | 46.66667 | 210.0033 |          |
| 961 |          |          |          | 15       | 37.13    |        |         |          | 150      |          |
| 962 |          |          |          | 43       | 74.26    |        |         |          | 636      | 50       |
| 963 |          |          |          | 24       | 193.38   |        |         | 250      | 375      |          |
| 964 | 120.125  | 35       | 84.065   | 30       | 99.01    | 12.5   |         | 55       | 134.375  |          |
| 965 |          |          |          | 10       | 37.13    |        |         | 123      | 125      | 31.96    |
| 966 | 132.1275 |          |          | 15       | 198.025  | 166.25 |         | 77.5     | 132.5    |          |
| 967 | 244.32   | 150      |          | 25       |          |        | 149.57  | 90       | 153      | 69.96    |
| 968 | 263.9167 | 105      | 373.3333 | 40       | 311.99   |        | 124.64  | 125      | 161.5    | 140.4133 |
| 969 |          | 110      | 254.63   | 12       | 138.715  |        |         | 112.5    | 156      |          |
| 970 | 300.41   | 188      |          |          | 196.22   | 120    |         | 48.33333 | 96.25    | 15.935   |
| 971 | 366.89   |          | 186.6667 |          |          |        |         | 120      | 150      | 35       |
| 972 |          |          |          |          |          |        |         |          |          |          |
| 973 |          | 130      | 186.6667 | 25       | 165.02   | 110    |         | 99.94    | 106      | 10.11    |
| 974 |          |          |          | 27       | 117.575  | 80     | 106.665 | 70       | 112.5    |          |
| 975 |          | 510      | 252.6    | 7        | 176.36   |        |         | 150.5    | 108.125  | 79.95    |
| 976 |          | 85.33334 |          | 36.66667 |          | 400    |         | 200      | 200      |          |
| 977 |          | 64.5     |          | 30       | 143.0167 |        |         |          | 84.25    |          |
| 978 | 167.72   | 89.875   |          | 28.33333 |          |        |         | 34.2     | 378.42   |          |
| 979 | 144.21   | 85.5     |          | 51       | 149.12   |        |         | 160      | 170.5    |          |
| 980 |          | 142.5    |          | 50       | 102.105  |        |         | 45       | 68.75    |          |
| 981 |          |          | 373.3333 |          | 495.05   | 29.7   |         |          |          | 80       |
| 982 |          |          |          |          |          |        |         | 170      | 73       |          |
| 983 |          | 141.25   |          |          |          | 250    | 100.17  | 101.25   | 175      |          |

|      |        |          |          |          |          |       |  |          |          |        |
|------|--------|----------|----------|----------|----------|-------|--|----------|----------|--------|
| 984  |        | 86.66666 |          |          | 281.565  | 250   |  | 111.5    | 100      |        |
| 985  |        | 492.75   |          | 22.5     | 198.02   |       |  |          | 146      |        |
| 986  |        |          | 140      | 27       | 99.01    |       |  |          | 132.5    |        |
| 987  |        | 170      | 186.6667 | 27       | 99.01    |       |  |          | 37.5     |        |
| 988  |        | 86       |          | 16       |          |       |  |          | 100      |        |
| 989  |        |          |          |          | 259.9    | 100   |  |          | 106      |        |
| 990  |        |          |          |          |          | 180   |  |          | 115.5    |        |
| 991  |        | 106.5    |          | 133.5    | 85.60667 | 110   |  |          | 116.6667 |        |
| 992  |        |          |          | 20       | 188.225  |       |  |          | 178.875  |        |
| 993  |        | 40       | 253.61   |          | 348.09   |       |  |          | 397.5    |        |
| 994  |        |          |          | 50       |          |       |  | 240      | 168.75   | 401.89 |
| 995  | 240.36 |          |          | 200      | 49.51    |       |  |          | 150      |        |
| 996  | 240.28 |          |          | 23       | 72       |       |  | 55       | 334.3333 |        |
| 997  | 480.56 | 170.6667 |          | 26.66667 | 128.92   |       |  | 112.5    | 103      |        |
| 998  | 598.46 | 258      |          | 130      |          |       |  |          | 77.5     |        |
| 999  |        | 76.66666 |          | 37.5     | 143.0613 |       |  |          | 145.6667 |        |
| 1000 |        |          | 186.6667 |          |          |       |  |          | 62       |        |
| 1001 |        | 301.8    |          |          |          |       |  |          |          |        |
| 1002 |        | 316      |          |          |          | 208.8 |  |          |          |        |
| 1003 |        | 258      |          | 21       | 132.0133 | 80    |  | 30       | 212      |        |
| 1004 | 240.38 |          |          | 45.65    |          | 79.6  |  | 50.66667 | 200      |        |
| 1005 |        |          |          | 30       |          | 330   |  | 30       | 180      |        |

| id | softdrinks_portion | soups_portion | sugar_portion | sweets_portion | toast_portion | tubers_portion | vegetables_portion | whitemeat_portion |
|----|--------------------|---------------|---------------|----------------|---------------|----------------|--------------------|-------------------|
| 1  | 249.96             |               | 2             |                | 16            | 25             |                    | 100               |
| 2  | 302.04             |               |               |                |               | 90             | 30                 |                   |
| 3  |                    |               | 10            |                |               |                |                    |                   |
| 4  |                    |               | 6.25          | 60             | 31            | 30             | 20                 | 20                |
| 5  |                    |               | 2.5           |                | 48            |                |                    | 140               |
| 6  |                    |               | 24            | 45             |               | 270            | 30                 | 39.6              |
| 7  |                    |               | 8             |                | 80            |                |                    | 55                |
| 8  | 149.98             |               | 10.6          |                | 32            |                |                    | 40                |
| 9  | 148.1175           |               | 4.533333      |                |               |                |                    | 180               |
| 10 | 249.96             |               |               |                |               |                | 50                 | 160               |
| 11 | 249.14             |               | 5             | 200            |               |                |                    |                   |
| 12 |                    |               |               |                | 27.333333     | 157.5          |                    |                   |
| 13 | 246.1733           |               | 8             | 60             | 40            |                | 10.66              | 200               |
| 14 |                    |               | 12            |                |               |                |                    |                   |
| 15 | 374.94             |               | 5             |                | 15            |                |                    | 35                |
| 16 | 249.15             |               | 5             |                |               |                |                    | 140               |
| 17 | 298.98             |               | 22.325        |                |               | 134            | 20                 | 100               |
| 18 |                    | 649.99        | 4             |                | 30            | 30             | 15.725             | 280               |
| 19 | 249.96             | 60            |               |                | 30            | 85             | 31.45              | 140               |
| 20 |                    | 563.3233      | 10.325        | 66             |               |                |                    |                   |
| 21 | 207.62             |               | 5.4           | 63             | 2.75          |                | 30                 | 45                |
| 22 | 415.25             |               |               |                |               |                |                    |                   |
| 23 | 208.3              |               |               | 77.45          | 40            |                | 14.15              |                   |
| 24 |                    | 20            |               |                |               | 140            |                    |                   |
| 25 |                    |               | 4.5375        | 107.605        |               |                |                    |                   |
| 26 |                    |               | 9             | 14.58          | 32            |                |                    |                   |
| 27 |                    |               |               |                |               |                | 100                | 680               |
| 28 | 144.13             |               | 5             | 40             |               | 35             | 52.5               | 65                |
| 29 | 129.76             |               | 6.5           | 57.06          |               | 40             | 80                 |                   |
| 30 | 149.98             |               | 5.616667      | 105            | 40            |                |                    | 76.5              |
| 31 | 74.99              |               | 3             |                | 26.66667      |                | 100                | 43.33333          |
| 32 |                    |               | 7.466667      |                | 55            |                | 18.75              | 140               |
| 33 |                    |               | 57.6          |                |               |                |                    |                   |
| 34 |                    |               | 3.75          |                |               |                | 60                 | 100               |
| 35 |                    |               |               | 52.5           |               |                | 28.5               | 60                |
| 36 |                    | 325           | 14.66667      | 11.2           | 46.33333      | 90             |                    |                   |
| 37 | 124.57             |               |               |                |               | 177.53         | 87                 |                   |
| 38 | 124.57             |               |               |                | 12.6          | 25             | 20                 |                   |
| 39 |                    |               |               |                | 24            |                |                    |                   |
| 40 |                    |               | 8             | 40             | 16            |                | 51                 |                   |

|    |          |        |          |        |        |          |          |
|----|----------|--------|----------|--------|--------|----------|----------|
| 41 |          | 22     |          |        |        | 60       |          |
| 42 |          |        | 3.75     |        | 260    | 360      | 63       |
| 43 | 363.34   |        |          |        |        | 26.06667 |          |
| 44 |          |        |          |        |        | 142.5    |          |
| 45 |          |        |          | 25     | 62.5   |          |          |
| 46 |          |        | 12       |        |        |          | 122      |
| 47 |          |        | 4        |        | 118.5  | 10       |          |
| 48 | 124.57   |        |          | 160.49 | 14.81  |          | 180      |
| 49 |          |        | 17       | 20     |        | 80       | 180      |
| 50 | 130.19   |        | 4.815    |        | 32     | 77.76667 | 40       |
| 51 |          | 162.5  |          |        | 16     |          | 70       |
| 52 | 342.58   |        |          | 22     |        |          | 240      |
| 53 |          |        | 10       |        |        | 120      |          |
| 54 |          |        |          |        |        | 30       |          |
| 55 |          |        | 10       | 400    |        | 49       |          |
| 56 | 156.23   |        | 8        |        | 105    |          |          |
| 57 | 249.96   |        | 15       |        | 109.94 |          |          |
| 58 | 350.32   |        | 3.666667 |        | 30     | 60       | 106.25   |
| 59 |          |        |          |        | 35     | 110      | 80       |
| 60 |          |        | 24       |        | 48     | 280      | 237.5    |
| 61 |          |        |          |        | 173.25 | 173.25   |          |
| 62 |          |        | 3.5      |        | 24     | 42.6     | 20       |
| 63 |          |        | 16       |        | 15     | 45       |          |
| 64 | 149.98   |        | 7.2      |        |        |          | 180      |
| 65 | 1046.43  |        | 4        |        | 45     |          | 310      |
| 66 |          |        | 4        |        |        |          | 500      |
| 67 | 174.9733 |        | 4.8      |        |        |          | 40       |
| 68 | 124.98   |        |          |        | 48     |          | 47.5     |
| 69 | 298.98   |        | 16.8     | 75     |        | 218.7    | 195      |
| 70 |          |        | 8.8      |        | 11.85  | 300      | 120      |
| 71 | 498.3    |        | 10.8     |        | 47.16  | 630      | 101.6667 |
| 72 | 249.15   |        |          | 100    |        |          | 270      |
| 73 |          |        | 4        |        | 32     |          |          |
| 74 |          |        | 32       |        |        | 15       |          |
| 75 | 149.98   |        | 7.5      |        |        | 144      | 60       |
| 76 | 498.84   |        | 4.8      |        |        | 31.5     | 360      |
| 77 | 274.96   |        | 6        | 59     |        |          |          |
| 78 |          |        |          |        | 30     | 141      | 60       |
| 79 | 158.31   |        | 12       |        | 39     | 45       | 24       |
| 80 | 373.7233 | 88.255 |          |        | 30     |          | 59.125   |
| 81 |          |        |          |        |        |          |          |

|     |         |        |          |          |          |     |          |          |
|-----|---------|--------|----------|----------|----------|-----|----------|----------|
| 82  |         |        |          |          |          |     |          |          |
| 83  |         | 135.49 |          |          |          |     | 20       |          |
| 84  |         | 519.99 |          |          |          |     | 45       | 40       |
| 85  |         |        | 7.2      |          |          |     |          | 120      |
| 86  |         |        | 11       |          | 30       | 195 | 78.75    | 127.5    |
| 87  |         |        |          |          |          | 60  | 50       | 260      |
| 88  |         | 519.99 |          |          |          | 60  | 112      | 105      |
| 89  | 249.15  |        | 3.1      |          |          |     | 40       |          |
| 90  | 249.15  |        | 2        |          |          |     | 40       |          |
| 91  |         |        | 12       |          |          |     | 30       | 75       |
| 92  |         |        |          |          |          |     |          | 120      |
| 93  | 433.265 | 234    | 7.85     | 31.72333 | 65       |     |          | 40       |
| 94  |         |        | 12       |          |          | 310 |          | 120      |
| 95  |         |        | 8        |          |          |     | 75       |          |
| 96  |         |        | 5.1575   |          |          |     | 42       |          |
| 97  |         |        | 7        | 75       |          |     |          |          |
| 98  |         |        | 1.25     |          |          |     | 110      | 120      |
| 99  |         |        | 40.65    |          |          |     | 100      |          |
| 100 | 124.57  |        |          | 40       | 23.25    |     |          |          |
| 101 |         |        |          |          |          |     |          | 135      |
| 102 |         |        | 12.33333 |          | 14.66667 |     | 37.5     |          |
| 103 | 149.98  |        | 9.85     | 186.25   |          |     | 72.75    | 640      |
| 104 |         |        | 6.8      |          |          | 400 | 372      | 180      |
| 105 | 603.56  |        | 5        | 70       |          | 145 | 75       | 155      |
| 106 |         |        | 8        |          |          | 70  | 75.66666 | 140      |
| 107 |         |        |          |          |          |     |          |          |
| 108 |         |        | 6.25     |          | 27.6     |     | 30       | 40       |
| 109 | 83.32   | 433.33 |          |          | 30       |     |          |          |
| 110 |         |        | 20.74    |          |          |     |          | 30       |
| 111 |         |        | 21.5     | 75       | 24       |     | 83.33334 | 46.66667 |
| 112 |         |        |          |          |          |     | 22.5     | 70       |
| 113 | 499.92  |        |          | 30       |          |     |          |          |
| 114 | 249.96  |        |          |          |          |     | 62.5     |          |
| 115 |         | 519.99 |          |          |          |     |          |          |
| 116 |         |        | 7.5      | 40       | 80       |     | 37.2     | 200      |
| 117 | 1494.9  |        | 18       |          | 80       |     | 75       | 100      |
| 118 | 399.94  |        | 9.225    | 17.5     | 16       |     | 80       | 90       |
| 119 |         |        | 7.25     |          | 24       |     |          |          |
| 120 | 240     |        | 4        |          |          |     | 72       |          |
| 121 | 499.92  |        | 2.375    | 37.5     |          |     | 20       |          |
| 122 | 363.34  |        | 9        | 80       |          |     | 39.33333 | 52       |

|     |          |        |          |         |          |       |          |        |
|-----|----------|--------|----------|---------|----------|-------|----------|--------|
| 123 | 1388.667 |        |          |         |          |       |          |        |
| 124 |          |        | 12.76429 |         |          |       |          | 180    |
| 125 |          |        | 8.95     | 140.375 | 24       |       | 58       |        |
| 126 |          |        | 18.25    |         |          |       |          |        |
| 127 |          | 22     | 10.8     |         |          |       |          | 80     |
| 128 | 249.96   |        | 12.8     |         | 32       |       |          |        |
| 129 | 524.915  |        | 7.45     |         |          |       |          |        |
| 130 |          |        |          |         |          |       | 25       | 10     |
| 131 | 208.3    |        | 4        | 72.91   |          |       | 48.75    | 402.5  |
| 132 |          |        | 12       |         |          |       | 50       | 500    |
| 133 |          |        |          |         |          | 1065  | 50       |        |
| 134 | 640.86   |        | 2.4      |         |          |       | 32       | 175    |
| 135 |          |        |          | 160     |          | 710   | 45       |        |
| 136 | 207.62   |        | 4        | 53.32   |          |       | 50       |        |
| 137 |          |        | 4        |         | 75       |       | 450      | 360    |
| 138 | 249.96   |        |          |         |          |       | 150      | 360    |
| 139 |          |        |          |         |          |       | 100      |        |
| 140 | 312.45   |        |          | 50      |          |       | 30       |        |
| 141 |          |        |          | 75      |          |       |          |        |
| 142 | 149.49   |        | 3.6      |         | 16       | 75    |          | 48.75  |
| 143 |          |        | 3.733333 |         | 16       |       |          |        |
| 144 |          |        | 15       |         | 32       |       |          | 60     |
| 145 |          |        | 12.75    |         |          |       | 12       | 30     |
| 146 |          | 300    | 5.133333 |         |          | 300   | 140      | 238.75 |
| 147 |          | 103.38 | 6.295    |         | 15       | 215   | 100      | 450    |
| 148 |          |        | 2.666667 |         |          | 100   | 26.66667 | 65     |
| 149 |          |        | 16.25    | 240     | 16       |       | 49.5     | 80     |
| 150 | 228.725  |        | 9.17     | 103     | 44       |       | 95       | 60     |
| 151 |          |        | 3.7      |         | 39.66667 |       | 50       | 70     |
| 152 |          |        | 11.64    | 30.306  | 33.53333 |       | 53       | 60     |
| 153 | 312.45   |        | 6.06     | 90      | 31.5     | 60    | 50       |        |
| 154 |          |        | 12       | 21      |          |       | 52.5     |        |
| 155 |          | 40     |          |         | 14       | 45    | 18.12667 | 30     |
| 156 | 149.49   |        | 9.030001 | 41.5    |          | 280   | 54.6     |        |
| 157 |          |        | 2.5      |         | 120      |       |          |        |
| 158 | 374.535  |        | 6        | 238.75  |          |       | 56       |        |
| 159 | 120.11   |        |          | 10.4    |          |       | 57       |        |
| 160 | 246.55   |        |          | 87.5    |          | 300   |          |        |
| 161 | 134.955  |        | 5.75     |         | 24       | 155.2 | 70       | 30     |
| 162 | 312.45   |        | 6.675    |         |          |       | 75       | 30     |
| 163 | 299.955  |        |          |         |          |       |          |        |

|     |          |         |          |        |      |        |       |          |
|-----|----------|---------|----------|--------|------|--------|-------|----------|
| 164 |          |         | 6.8      | 26.25  | 64   |        | 100   | 84.5     |
| 165 | 187.47   |         | 12.6     |        | 31   |        | 40    | 200      |
| 166 | 249.96   |         | 4        | 180    |      |        |       |          |
| 167 | 312.11   |         | 3.675    |        |      | 45     | 26.25 |          |
| 168 | 324.95   |         | 3.675    |        | 188  |        |       |          |
| 169 | 249.96   |         |          |        |      |        |       |          |
| 170 |          |         |          |        | 27.6 |        | 70    | 78.33334 |
| 171 | 363.34   |         |          |        |      |        |       |          |
| 172 | 249.15   |         | 6        |        |      |        |       |          |
| 173 | 141.6467 |         | 11.85    | 60     | 20   |        |       |          |
| 174 |          |         |          |        |      | 20     |       |          |
| 175 |          |         |          | 14.98  |      |        | 90    |          |
| 176 |          | 150.16  | 24       |        | 56   |        |       |          |
| 177 |          |         | 3.6      |        |      |        | 45    |          |
| 178 | 299.95   |         | 24       |        |      |        | 45    | 120      |
| 179 | 124.98   |         | 12       |        |      |        |       | 40       |
| 180 |          |         | 8        |        | 20   |        | 19.5  | 60       |
| 181 |          |         |          |        | 15   |        |       | 40       |
| 182 | 156.23   |         | 6.6      |        |      |        |       |          |
| 183 |          |         | 4        |        |      |        | 50    | 140      |
| 184 | 156.23   |         | 3.6      | 40.08  |      |        |       |          |
| 185 |          | 325     | 2.5625   |        |      |        |       |          |
| 186 | 149.49   |         | 0.8      |        |      |        |       |          |
| 187 |          |         | 7.5      |        |      |        |       |          |
| 188 |          |         | 21.6     |        |      |        |       |          |
| 189 | 363.34   |         | 12       |        | 45   |        | 43.5  |          |
| 190 | 228.79   |         |          | 37.5   |      |        |       | 180      |
| 191 |          |         | 13.54    |        | 16   |        | 40    |          |
| 192 | 314.99   |         | 2.59     |        | 160  |        | 78    |          |
| 193 |          |         | 5.333333 |        |      |        | 105.9 | 120      |
| 194 |          |         | 4        |        |      |        | 105   |          |
| 195 |          |         | 4        |        |      |        | 315   |          |
| 196 |          |         |          |        | 20   |        | 100   |          |
| 197 | 224.235  | 519.99  | 7.2      |        | 80   |        |       |          |
| 198 |          |         | 9.6      | 120.17 |      |        | 5     |          |
| 199 |          | 324.99  | 8        |        |      |        | 30    |          |
| 200 | 374.695  |         | 4.165    |        | 32   |        | 12.9  | 120      |
| 201 |          |         | 6.6      |        |      |        |       | 126.155  |
| 202 |          | 212.875 | 23.25    |        |      | 50.975 |       |          |
| 203 |          |         | 3.166667 |        |      |        | 61.5  | 60       |
| 204 |          |         | 9.75     |        |      |        |       | 90       |



|     |          |  |          |         |          |      |        |          |
|-----|----------|--|----------|---------|----------|------|--------|----------|
| 205 |          |  | 6        |         |          |      |        | 80       |
| 206 | 374.94   |  | 6.48     |         |          |      |        | 320      |
| 207 |          |  | 7.2      |         |          |      |        |          |
| 208 | 149.98   |  |          |         |          | 175  |        | 90       |
| 209 |          |  | 4.6      |         |          |      |        |          |
| 210 |          |  |          | 160     |          |      | 60     | 195      |
| 211 |          |  | 18       |         | 20       |      | 50     |          |
| 212 |          |  |          |         | 14.63333 |      | 50     |          |
| 213 | 209.9767 |  |          | 60      | 10       |      | 40     | 70       |
| 214 |          |  | 8.1      |         |          | 16.5 | 37.5   | 70       |
| 215 |          |  | 6        |         |          |      |        |          |
| 216 |          |  | 34.66667 |         | 40       |      | 45     | 180      |
| 217 | 560.585  |  | 10.01    |         | 21       | 95   |        | 100      |
| 218 |          |  | 10       | 127.085 | 16       |      | 11.25  |          |
| 219 |          |  | 5        |         | 12       |      | 30     | 100      |
| 220 | 249.555  |  | 12       | 22      |          |      | 90     |          |
| 221 | 374.13   |  | 6.816667 | 28.75   |          |      |        |          |
| 222 |          |  | 16       | 60      | 80       | 235  | 35     |          |
| 223 | 999.84   |  | 4        |         | 40       |      |        | 240      |
| 224 |          |  | 4        |         | 25       |      |        | 35       |
| 225 |          |  | 10       |         |          | 355  |        |          |
| 226 |          |  | 6.15     |         |          |      | 215.35 | 70       |
| 227 |          |  | 7.35     |         | 21.66667 |      | 50     | 80       |
| 228 |          |  | 5.8125   |         |          |      | 40     |          |
| 229 |          |  |          |         | 31       | 60   | 50     | 40       |
| 230 |          |  | 3.75     |         |          |      |        | 150      |
| 231 | 149.98   |  |          |         |          |      |        |          |
| 232 | 149.98   |  |          |         |          |      |        |          |
| 233 |          |  | 7.3      |         | 24       |      |        | 240      |
| 234 |          |  | 10.225   |         | 24       | 42.6 | 60     | 120      |
| 235 |          |  | 16.625   | 30      | 17.4     |      |        |          |
| 236 |          |  | 12       | 77.33   |          |      |        | 92.31    |
| 237 |          |  | 2        |         |          |      |        |          |
| 238 |          |  | 57.19    |         |          |      |        |          |
| 239 | 249.96   |  | 6.333333 |         | 30       |      | 50     |          |
| 240 | 312.45   |  |          |         |          |      | 70     | 213.3333 |
| 241 |          |  | 2.25     |         | 24       |      | 100    |          |
| 242 | 249.96   |  | 4.533333 | 22.5    | 25       |      |        | 120      |
| 243 |          |  | 9.6      | 150     | 20       | 130  | 50     |          |
| 244 | 520.75   |  | 48.6     | 53.75   | 39       |      |        | 80       |
| 245 |          |  | 24       |         |          | 290  |        |          |

|     |          |        |          |          |          |          |          |          |
|-----|----------|--------|----------|----------|----------|----------|----------|----------|
| 246 |          | 260    | 9        |          | 13       | 47       | 56.66667 | 110      |
| 247 | 833.2    |        | 10.325   |          |          |          |          | 32       |
| 248 | 281.205  |        | 10.85    |          | 24.33333 | 15       | 10.625   |          |
| 249 |          |        |          |          |          |          |          |          |
| 250 |          |        | 8        | 80       |          |          |          |          |
| 251 |          |        | 10.575   | 50       |          |          | 49.06667 | 68       |
| 252 | 162.07   |        | 3.834286 | 12.53333 | 38       | 114.6667 | 75       |          |
| 253 |          |        | 5.25     | 80       | 35       |          |          | 110      |
| 254 | 363.34   |        | 4        |          |          |          | 10       | 75       |
| 255 |          | 248.51 | 5.666667 | 50       |          | 41.55    | 41.55    |          |
| 256 |          | 259.86 | 43.5     |          |          |          |          |          |
| 257 |          |        | 9.3      |          |          |          | 50       |          |
| 258 |          |        | 8        |          | 32       |          | 51.66667 | 50       |
| 259 |          |        | 5.333333 |          | 20.625   |          | 75       | 100      |
| 260 |          |        |          |          | 20       |          | 14.732   | 116.6667 |
| 261 | 249.96   |        | 12       | 310      |          |          | 108      |          |
| 262 | 249.15   |        | 14.25    | 12.5     |          |          | 30       | 132.5    |
| 263 | 289.015  |        | 15       |          |          |          | 75       | 30       |
| 264 |          | 520.01 |          |          |          |          |          | 37.5     |
| 265 |          |        | 21.6     |          |          |          |          |          |
| 266 | 249.96   |        | 5.7      | 33.75    |          |          | 64       |          |
| 267 | 240.22   |        | 4.63     |          | 25       |          | 30       |          |
| 268 | 146.99   |        |          |          |          |          | 50       |          |
| 269 |          |        | 4.5      |          | 15.8     |          |          |          |
| 270 |          |        |          |          |          |          |          |          |
| 271 | 999.84   |        | 12       |          |          |          | 200      |          |
| 272 | 279.31   |        |          |          | 14       |          | 24.25    | 120      |
| 273 | 149.4867 |        | 6        |          |          | 140      | 43.33333 |          |
| 274 |          |        | 12       |          |          |          |          |          |
| 275 |          |        | 3.6      |          |          | 8.75     | 6.25     | 40       |
| 276 |          |        | 4.625    |          | 16       | 64.58334 | 42.41667 | 160      |
| 277 |          |        | 4        | 15       |          | 8.75     | 5.625    | 140      |
| 278 |          |        |          |          |          |          | 30       |          |
| 279 | 200.18   |        |          |          |          |          |          | 150      |
| 280 |          |        | 2.25     |          |          |          |          | 100      |
| 281 | 149.49   |        |          |          |          |          | 76.6     | 55       |
| 282 |          |        |          |          | 32       |          | 67       |          |
| 283 |          |        | 4.8      | 15       | 15       |          | 35.8     | 155      |
| 284 |          |        | 5.6      |          |          |          | 50       | 50       |
| 285 | 363.34   |        |          |          |          | 22.5     | 24       |          |
| 286 | 249.15   |        | 12       |          | 32       | 20       | 100      |          |

|     |         |        |          |          |          |       |         |          |
|-----|---------|--------|----------|----------|----------|-------|---------|----------|
| 287 |         | 519.99 |          |          |          |       |         |          |
| 288 |         |        | 6        |          | 25       |       |         |          |
| 289 | 364.53  |        | 6        |          |          | 50    | 15      |          |
| 290 |         |        | 63       |          |          |       |         |          |
| 291 |         |        | 7.5      |          |          |       | 50      |          |
| 292 |         |        |          |          |          |       |         | 100      |
| 293 |         |        | 5.166667 |          |          |       |         | 120      |
| 294 |         |        | 13.66667 |          |          |       |         | 10       |
| 295 |         |        | 6        |          |          |       |         |          |
| 296 | 282.64  |        | 8        | 116.6667 | 60       |       |         |          |
| 297 |         | 520    | 8.55     |          | 45       | 80    |         |          |
| 298 |         | 1040   | 14.5     | 483.26   | 113.3333 | 290   | 60      |          |
| 299 |         |        | 29.4     |          |          | 77.99 |         |          |
| 300 |         |        | 5.625    |          | 40       |       |         |          |
| 301 | 145.81  |        | 8.2      |          |          | 30    |         | 60       |
| 302 |         |        |          |          |          |       |         | 110      |
| 303 | 373.725 |        | 4        | 3        |          |       | 30      |          |
| 304 | 749.88  |        | 6        |          |          |       |         |          |
| 305 |         |        | 5.4      |          | 14.75    |       |         |          |
| 306 |         |        | 8.82     |          | 31.5     |       | 10      | 40       |
| 307 |         |        |          | 195.0467 |          |       |         | 48.75    |
| 308 |         |        | 8.666667 |          | 39       |       |         | 50       |
| 309 |         |        | 6        |          | 100      |       |         |          |
| 310 | 499.92  |        | 8.125    |          |          |       |         |          |
| 311 | 299.95  |        | 5        |          |          |       |         |          |
| 312 |         |        | 5        |          |          |       |         |          |
| 313 |         |        | 36       |          |          |       |         | 100      |
| 314 |         |        | 2.25     |          |          |       |         |          |
| 315 |         | 520.35 |          |          |          |       | 24      | 40       |
| 316 |         | 520.35 | 5        |          |          |       | 13.5    | 40       |
| 317 |         |        | 6        |          |          |       | 35      | 85.50667 |
| 318 |         | 312    |          |          | 10       | 125   | 57.5    |          |
| 319 | 364.53  |        |          |          | 50.4     |       | 34      |          |
| 320 |         |        | 5        |          |          |       | 18.1975 | 180      |
| 321 |         |        |          |          |          |       | 90      | 105      |
| 322 |         |        | 16       |          |          |       | 100     | 170      |
| 323 | 130.19  | 519.99 | 7.5      |          |          |       | 25      |          |
| 324 |         |        | 7.5      |          | 28       |       |         |          |
| 325 |         |        |          |          | 26       |       |         |          |
| 326 | 249.42  |        | 16       |          |          | 70    |         | 40       |
| 327 |         | 454.99 | 8        | 30       | 17       | 90    | 44.5    |          |

|     |          |        |          |          |      |       |          |        |
|-----|----------|--------|----------|----------|------|-------|----------|--------|
| 328 |          | 454.99 | 9        | 16.25    | 30   |       | 33.125   |        |
| 329 |          |        | 8.325001 | 110      |      |       |          |        |
| 330 |          |        | 7.5      | 285      |      |       |          |        |
| 331 |          |        |          | 200      | 12.9 |       | 50       |        |
| 332 | 78.11    |        | 12       |          |      |       | 30       |        |
| 333 |          |        |          |          |      |       | 3        | 65     |
| 334 | 240.22   |        |          |          |      |       |          | 102    |
| 335 |          |        | 4        |          |      |       |          | 360    |
| 336 |          | 659.11 | 13.41667 |          |      |       | 12       |        |
| 337 |          |        | 4        |          |      |       | 120      |        |
| 338 | 207.62   |        | 9.333333 |          |      |       | 23.125   | 50     |
| 339 | 183.3067 |        | 3.675    |          |      |       |          |        |
| 340 | 162.35   |        | 9.6      | 25       | 33.6 |       |          | 80     |
| 341 |          |        | 15.1     |          |      | 110   | 57.33333 | 300    |
| 342 |          |        | 7.688    |          | 46   |       | 66.6     | 55     |
| 343 |          |        | 14       |          | 150  | 80    |          | 65     |
| 344 | 299.95   |        | 10.4     |          |      | 80    |          | 200    |
| 345 |          |        | 23.4     | 12       | 23   | 79.89 | 21       |        |
| 346 | 156.22   |        | 3.45     |          |      | 63.9  |          | 18.75  |
| 347 | 249.96   |        | 3.7      | 49.825   | 22.5 |       | 30       | 40     |
| 348 | 114.045  |        | 3.375    |          | 30   |       | 30       | 40     |
| 349 | 1868.61  |        |          |          |      |       |          |        |
| 350 |          |        | 23.6     |          |      |       |          |        |
| 351 |          |        | 14.4     |          |      |       |          |        |
| 352 | 325.99   |        | 9.075    |          |      |       | 30       |        |
| 353 |          |        |          |          |      |       | 50       | 100    |
| 354 |          |        | 4.395    |          |      | 110   | 20       |        |
| 355 | 249.15   |        | 10.5     |          |      |       |          | 116.25 |
| 356 | 249.15   |        | 6.666667 |          |      |       |          |        |
| 357 |          |        | 10.8     |          |      |       |          |        |
| 358 |          |        | 5.475    |          |      |       |          | 200    |
| 359 | 274.065  |        | 4.6125   | 23.48    |      |       |          |        |
| 360 | 218.31   |        | 4.575    | 35.23    |      |       |          | 132.5  |
| 361 | 374.13   |        | 6.625    | 79.66666 |      |       |          | 65     |
| 362 |          |        | 24       | 117.375  | 75   |       |          |        |
| 363 | 149.49   |        | 5.37     |          |      |       | 90       |        |
| 364 | 149.49   |        | 8        |          |      |       |          |        |
| 365 |          | 100.5  | 8.4      |          |      |       |          |        |
| 366 | 244.98   |        | 8.625    |          |      |       | 200      |        |
| 367 | 112.48   |        | 5.692857 | 107.79   |      |       |          |        |
| 368 |          |        | 7        |          | 16   |       | 37.5     |        |

|     |         |        |          |          |       |       |          |       |
|-----|---------|--------|----------|----------|-------|-------|----------|-------|
| 369 | 334.465 |        | 18       |          |       | 30    | 90       | 50    |
| 370 |         |        | 6.625    |          |       |       |          | 180   |
| 371 |         |        | 6        |          | 24    |       | 85.5     |       |
| 372 | 467.155 |        |          | 83.66666 |       |       | 60       |       |
| 373 |         |        | 4.8      |          |       | 15    | 13.33    | 95    |
| 374 |         |        | 21.6     |          |       | 141   |          |       |
| 375 |         |        | 13.5     |          | 18.5  |       | 30       | 100   |
| 376 |         |        | 3        |          |       |       |          |       |
| 377 |         |        | 4.8      |          | 15    |       | 60       |       |
| 378 | 149.49  |        | 11.05    | 70       |       |       | 43.88    | 90    |
| 379 |         |        | 11.58    |          |       |       | 35       |       |
| 380 |         |        | 15.8     | 22.5     | 40    | 53.75 | 83.33334 | 140   |
| 381 | 299.95  |        | 10.61667 |          |       | 188   | 90       |       |
| 382 |         |        | 7.866667 | 22.46    | 48    |       |          |       |
| 383 |         |        | 5.852    | 79.13    | 34    |       |          |       |
| 384 | 570.965 |        |          | 25       |       |       |          |       |
| 385 |         | 292.5  |          |          | 16.25 |       |          |       |
| 386 |         |        | 11.5     |          | 15    |       |          |       |
| 387 |         |        | 5        |          |       |       | 30       | 200   |
| 388 |         |        | 10.25    |          |       |       |          |       |
| 389 |         |        | 12.13333 |          |       |       | 52.5     | 140   |
| 390 | 74.74   |        | 3.666667 |          |       |       |          |       |
| 391 | 100.09  |        |          |          |       |       | 20       |       |
| 392 |         |        | 9.6      |          |       |       | 120      | 80    |
| 393 | 149.98  |        |          |          |       |       | 75       |       |
| 394 |         |        | 6.15     |          | 20    |       |          | 73.75 |
| 395 | 363.34  |        | 16.8     |          |       |       | 94       | 65    |
| 396 | 149.49  |        |          | 34.24    |       |       | 35       |       |
| 397 | 187.23  |        | 3.283333 |          | 20    |       | 132      | 180   |
| 398 | 249.96  |        | 12       |          |       |       | 71.66666 |       |
| 399 |         |        |          |          |       |       | 35.83333 |       |
| 400 |         |        |          |          |       |       |          |       |
| 401 |         |        |          |          |       |       | 25       |       |
| 402 |         |        | 16.2     |          | 24    |       |          |       |
| 403 | 761.365 |        | 12       |          | 200   |       |          | 40    |
| 404 |         |        | 32       |          |       | 35.7  | 63.75    |       |
| 405 | 624.9   | 519.99 |          | 30       |       |       |          |       |
| 406 | 215.815 | 519.99 | 7.85     | 25.45    | 34.25 |       | 30       |       |
| 407 | 156.23  |        | 8        | 25       | 20    |       | 30       | 120   |
| 408 |         |        | 12       |          | 20    |       | 200      |       |
| 409 | 249.15  |        | 12       | 25       |       |       | 50       |       |

|     |         |       |          |        |       |     |          |          |
|-----|---------|-------|----------|--------|-------|-----|----------|----------|
| 410 |         |       | 13.13333 |        |       |     | 45       | 60       |
| 411 | 519.06  |       | 7.1      |        |       |     |          |          |
| 412 |         |       |          | 238.96 |       |     | 53       |          |
| 413 |         |       |          |        |       |     |          | 160      |
| 414 |         |       |          |        |       |     |          | 160      |
| 415 | 374.94  |       | 8.475    | 16     |       |     | 104      | 80       |
| 416 |         |       | 5        |        |       |     |          | 310      |
| 417 | 373.725 |       | 2        |        |       |     |          | 121.6667 |
| 418 | 224.725 |       |          |        |       |     |          | 60       |
| 419 |         |       | 9.6      | 150    | 20    | 20  | 50       | 20       |
| 420 |         |       | 5.6      |        |       |     |          |          |
| 421 |         |       |          |        | 18    |     | 178.6667 | 180      |
| 422 |         |       |          |        | 35    | 10  | 32.5     | 80       |
| 423 | 129.975 |       | 12.4     | 20     |       |     |          | 105      |
| 424 | 124.98  |       | 2.5      | 17.5   |       |     | 272      | 70       |
| 425 |         |       | 25.125   |        | 40    |     | 115      |          |
| 426 | 83.32   |       | 9        |        | 35    | 280 | 72       | 48.75    |
| 427 | 181.67  |       | 10.125   |        |       |     |          | 120      |
| 428 |         |       |          | 30     |       |     |          |          |
| 429 |         |       | 7        |        |       |     |          | 80       |
| 430 |         |       | 14       |        |       |     | 120      | 100      |
| 431 | 249.15  |       | 27.2     |        |       |     | 45       | 217.13   |
| 432 |         |       |          | 37.45  |       |     | 103.75   |          |
| 433 |         |       | 12.5     |        | 32    |     | 60       |          |
| 434 | 498.3   |       | 24       | 7.5    |       |     |          |          |
| 435 | 298.98  |       | 9        | 92.18  |       |     | 50       |          |
| 436 |         | 89.47 | 37.8     |        | 43.75 |     |          |          |
| 437 |         |       |          |        | 10    |     | 45       | 81.16666 |
| 438 |         |       | 8        |        |       |     | 90       |          |
| 439 |         |       | 6.25     |        |       |     | 22.5     | 50       |
| 440 |         |       | 6        |        |       |     |          |          |
| 441 |         |       | 7.125    |        |       |     | 82.5     |          |
| 442 | 149.49  |       | 3.6      | 143.98 |       |     | 60       |          |
| 443 | 224.235 |       |          | 100    |       |     |          |          |
| 444 | 1041.5  |       | 11.33333 |        | 80    | 141 |          | 120      |
| 445 |         |       | 30       |        |       |     |          |          |
| 446 |         |       | 4.8      | 40     |       |     |          |          |
| 447 | 285.82  |       |          | 80     |       |     |          |          |
| 448 |         |       | 12       |        | 32    |     |          |          |
| 449 | 299.95  |       | 2.25     |        |       |     | 60       | 150      |
| 450 |         |       | 9.833333 |        | 32    |     | 121.25   | 146.25   |

|     |         |     |          |        |     |       |          |         |
|-----|---------|-----|----------|--------|-----|-------|----------|---------|
| 451 | 149.98  |     | 3.375    | 37.5   |     |       |          | 50      |
| 452 | 149.49  |     | 14.25    |        |     |       |          |         |
| 453 | 149.98  |     | 39.9     |        |     |       | 21       | 114.615 |
| 454 |         |     | 12       |        |     |       |          | 80      |
| 455 |         |     | 12       |        |     |       |          | 40      |
| 456 |         |     | 36       |        |     |       |          | 80      |
| 457 |         |     | 5.475    |        |     |       |          | 40      |
| 458 |         |     |          |        |     |       |          | 55      |
| 459 | 149.98  |     | 3.75     |        | 24  | 22.5  |          |         |
| 460 |         | 360 | 4        |        |     | 92    |          | 40      |
| 461 | 498.3   |     |          |        |     |       | 50       |         |
| 462 | 430.82  |     |          |        |     |       |          |         |
| 463 |         |     |          |        |     |       | 47.5     | 120     |
| 464 |         |     |          |        |     | 210   | 50       | 137.31  |
| 465 |         | 160 |          |        | 30  |       |          |         |
| 466 |         |     |          |        | 10  |       |          |         |
| 467 | 149.98  |     | 14.4     |        |     | 5.5   |          |         |
| 468 |         |     | 10       |        |     |       | 100      |         |
| 469 |         |     | 9.6      |        |     |       | 40       |         |
| 470 |         |     | 5.7      |        |     | 20    |          |         |
| 471 | 373.725 |     | 7.2      |        | 20  |       | 100      |         |
| 472 |         | 195 | 7.08     |        |     |       | 2.7      |         |
| 473 |         |     | 4        | 22.5   |     | 88.88 |          | 40      |
| 474 | 499.92  |     | 16.53333 | 99.97  | 25  |       | 66       | 65      |
| 475 | 75      |     | 14.13333 | 99.97  | 5.2 |       |          | 65      |
| 476 |         |     | 8.133333 | 280    | 64  |       |          | 40      |
| 477 |         |     | 2.5      |        |     |       | 46       |         |
| 478 |         |     |          | 32     | 20  |       | 128.3333 | 44      |
| 479 | 199.97  |     | 13.6     |        | 25  |       | 52       |         |
| 480 |         |     | 5        |        |     |       |          |         |
| 481 |         |     | 6.885    |        |     |       | 15       |         |
| 482 |         |     | 8        |        |     |       |          |         |
| 483 |         |     | 2.7      |        |     |       | 30       |         |
| 484 |         |     | 6.25     | 50     |     | 160   |          |         |
| 485 | 130.19  |     |          |        | 16  |       | 160      | 56.875  |
| 486 | 187.54  |     |          | 179.22 |     | 37.5  | 46.875   |         |
| 487 | 249.96  |     | 2.25     | 40     |     |       | 100      | 65      |
| 488 |         |     | 8        |        |     |       | 15       | 180     |
| 489 |         |     | 8.25     |        |     |       |          | 85      |
| 490 |         |     | 19       |        | 25  |       |          | 140     |
| 491 |         |     | 6.4      |        |     |       |          | 65      |

|     |         |        |          |       |          |       |          |          |
|-----|---------|--------|----------|-------|----------|-------|----------|----------|
| 492 | 249.15  |        | 9.6      |       |          |       |          |          |
| 493 |         |        |          | 15    | 151.6667 | 36    |          |          |
| 494 |         |        | 12.5     |       | 60       |       | 100      |          |
| 495 | 998.215 |        | 24       |       |          |       | 133.3333 | 80       |
| 496 | 124.98  |        |          |       | 26.25    |       |          | 162.5    |
| 497 |         |        | 5        |       |          |       |          |          |
| 498 |         |        | 9        |       |          |       |          |          |
| 499 | 387.44  | 341.25 | 5        | 50    |          |       | 120      | 65       |
| 500 | 208.3   |        | 10.5     | 22.5  | 20       |       | 400      | 95       |
| 501 |         |        | 3.75     |       |          | 15    |          | 50       |
| 502 | 149.98  |        | 7.5      |       |          | 24    | 97.5     | 223.3333 |
| 503 | 149.98  |        | 8.25     |       |          | 30    | 36.66667 | 38.75    |
| 504 |         |        | 27.6     | 43.75 |          |       | 45       |          |
| 505 | 499.92  |        | 24       |       |          |       |          |          |
| 506 |         |        | 9.6      |       |          |       |          | 80       |
| 507 |         |        | 7.2      |       |          |       | 60       | 70       |
| 508 |         | 52.8   | 4        | 25    |          | 21    |          |          |
| 509 |         |        | 2.25     |       | 30       |       | 30       |          |
| 510 |         |        | 9.6      |       | 39.25    |       |          | 105.625  |
| 511 |         |        |          |       | 15.5     |       | 75       | 120      |
| 512 |         |        | 13.45    |       | 20       |       | 21.66667 |          |
| 513 |         |        |          |       |          | 140   |          | 100      |
| 514 | 240.22  |        | 2.25     |       |          | 280   |          | 67.5     |
| 515 |         | 119.76 | 49       |       | 10       |       | 23.75    |          |
| 516 |         |        |          | 48    | 18.325   |       | 137.5    |          |
| 517 |         | 260    |          | 75    | 10       |       | 138.95   |          |
| 518 |         |        | 26.75    |       |          |       | 31.33333 | 60       |
| 519 |         |        | 11       |       |          |       |          |          |
| 520 |         |        | 6        | 80    |          | 140   | 200      |          |
| 521 |         |        |          |       | 8        |       | 50       |          |
| 522 |         |        | 12.75    |       |          |       |          |          |
| 523 |         |        | 4        |       |          |       | 60       |          |
| 524 |         |        | 6        | 130   | 10       | 90    | 592.5    | 130      |
| 525 |         | 260    | 3.6      |       |          |       |          | 40       |
| 526 | 810.95  |        |          |       | 52       | 20    | 15       | 52.5     |
| 527 | 293.49  |        | 7.5      |       |          |       |          | 105      |
| 528 |         |        |          |       |          |       |          |          |
| 529 |         | 779.99 | 3.533333 |       |          |       |          |          |
| 530 | 124.57  |        | 5.8      | 28    | 40       |       |          | 48       |
| 531 | 249.96  |        | 9        | 43    | 50       | 126   | 25.75    |          |
| 532 |         |        | 6        |       |          | 186.7 | 45.33333 | 220      |



|     |         |        |          |         |          |        |          |          |
|-----|---------|--------|----------|---------|----------|--------|----------|----------|
| 533 | 149.49  |        |          | 40      |          |        |          |          |
| 534 | 149.98  |        |          |         |          |        |          |          |
| 535 |         |        | 2        |         |          | 69.3   | 69.3     |          |
| 536 |         |        | 4        |         |          |        | 40       |          |
| 537 |         | 349.99 | 10       |         |          |        |          | 155      |
| 538 | 207.62  | 260    | 3        |         | 6        |        | 258      | 48.75    |
| 539 |         |        |          |         |          |        | 31       |          |
| 540 |         | 390    |          |         |          | 50     |          |          |
| 541 | 150.935 | 519.99 | 5.2      |         |          |        | 60       |          |
| 542 |         | 74.83  | 3.133333 | 48.6475 | 30       | 75     | 13.8     | 56.25    |
| 543 |         |        | 12       |         |          | 110    | 23.33333 | 24       |
| 544 |         | 520    |          |         |          |        |          |          |
| 545 |         |        | 3.375    | 50      | 27       |        | 20       |          |
| 546 | 499.11  |        | 2.25     |         |          | 90     | 30       | 150      |
| 547 | 499.92  |        | 12.66667 |         |          | 90     |          | 30       |
| 548 |         |        | 9.6      | 59.88   |          |        |          | 45       |
| 549 |         | 72     |          | 100     | 25       |        | 30       | 95.44    |
| 550 |         |        |          | 124.45  |          |        |          |          |
| 551 |         |        |          | 126.38  |          |        | 10       | 32.5     |
| 552 |         | 519.99 |          | 32.5    |          | 81.95  | 75       | 51.75    |
| 553 |         | 519.99 | 12       | 10      |          |        |          | 275      |
| 554 |         |        | 10.85    | 123     | 18.33333 |        | 45       | 55       |
| 555 |         |        |          |         |          | 30     | 240      | 105      |
| 556 |         |        | 9        |         |          | 30     | 180      | 105      |
| 557 |         |        | 12       |         |          |        | 55       |          |
| 558 |         |        |          |         | 25       |        | 47.5     |          |
| 559 | 112.48  |        |          |         |          |        | 33.75    |          |
| 560 |         |        | 9.333333 | 60.005  |          | 40     | 300      | 73.33334 |
| 561 |         |        | 4.725    | 192     | 18       |        | 52       | 102.31   |
| 562 | 249.15  |        |          |         |          |        |          |          |
| 563 | 207.62  |        |          |         |          |        |          |          |
| 564 |         |        | 8.75     | 30      |          | 180    |          |          |
| 565 |         |        | 12       |         |          |        |          |          |
| 566 |         |        |          |         |          |        | 133.3333 | 74       |
| 567 | 149.98  |        | 9.6      |         |          |        |          | 120      |
| 568 |         |        | 9.85     | 152.17  |          |        | 66.6     |          |
| 569 | 259.53  |        | 7        | 5       | 21.33333 | 346.25 | 72       | 40       |
| 570 |         |        | 8        | 60      | 27       | 400    |          | 140      |
| 571 | 149.98  |        | 8        | 56      | 24       | 50     | 30       |          |
| 572 |         | 390    | 18       |         | 30       |        | 15       |          |
| 573 |         |        | 48       |         |          |        | 100      | 40       |

|     |        |      |          |        |          |       |        |          |
|-----|--------|------|----------|--------|----------|-------|--------|----------|
| 574 |        |      | 15.6     |        |          |       |        |          |
| 575 |        |      | 6.512    |        |          |       |        |          |
| 576 |        |      | 7.105    |        | 20       |       | 45     | 52.5     |
| 577 |        |      | 3.19     |        | 32       |       |        | 75       |
| 578 |        |      | 5.966667 |        |          |       | 43.61  |          |
| 579 | 622.87 |      | 2        | 10     |          |       | 30     | 40       |
| 580 |        |      | 9.75     | 100    |          | 140   | 45     |          |
| 581 |        |      | 21.9     | 20     |          |       | 272.5  |          |
| 582 | 363.34 |      | 15       | 150    |          |       | 242.25 | 120      |
| 583 |        |      | 23.34    |        |          |       | 15     |          |
| 584 |        |      |          | 90     |          | 33.75 | 30     |          |
| 585 |        | 1040 |          |        | 24       |       | 100    |          |
| 586 |        | 520  | 7.2      |        |          |       | 87.5   | 100      |
| 587 | 747.45 |      | 16.5     | 90     |          |       |        |          |
| 588 |        |      | 36       | 20     | 10.3     |       | 24     |          |
| 589 | 306.84 |      |          | 50     |          |       | 63     | 100      |
| 590 | 311.44 |      | 12       |        | 30       | 140   | 90     | 90       |
| 591 |        |      | 8        | 80     | 40       |       | 50     | 40       |
| 592 |        |      |          | 68     |          |       |        | 40       |
| 593 | 799.35 |      | 3.3      |        |          |       | 45     | 153.3333 |
| 594 |        |      | 9.6      | 61.335 |          |       |        |          |
| 595 |        |      | 15       |        | 17.77    |       | 27.5   |          |
| 596 |        |      |          | 30     |          | 174   | 104    | 21       |
| 597 | 130.19 |      |          | 54.5   |          | 22.5  | 18.75  | 180      |
| 598 | 249.15 |      | 11.33333 |        |          |       |        |          |
| 599 |        |      | 12       |        | 15       |       | 68     |          |
| 600 |        |      | 5.75     |        |          |       | 45     | 40       |
| 601 |        |      | 11.95    |        |          |       |        |          |
| 602 | 519.06 |      | 5        |        |          |       |        |          |
| 603 | 298.98 |      | 9        | 17.75  |          |       |        |          |
| 604 |        |      |          |        |          |       |        |          |
| 605 |        |      | 8        | 30     | 44.1     |       |        |          |
| 606 |        |      | 5        |        |          | 45    | 37.5   |          |
| 607 | 249.96 |      | 3.375    | 16     | 40.33333 |       | 17.5   |          |
| 608 |        |      | 7.125    |        |          |       | 120    | 127.5    |
| 609 |        | 24.9 |          |        |          | 30    |        | 40       |
| 610 |        |      |          |        |          |       |        | 100      |
| 611 |        |      | 8        |        | 25       |       |        | 272      |
| 612 |        |      |          |        |          |       | 33.3   |          |
| 613 | 298.98 |      | 9.6      |        |          |       |        | 67.5     |
| 614 |        |      | 5.925    | 80     |          |       |        |          |

|     |         |         |          |        |          |      |          |          |
|-----|---------|---------|----------|--------|----------|------|----------|----------|
| 615 | 49.83   | 1040    |          | 334.33 | 10       | 280  |          | 50.59    |
| 616 | 364.53  |         | 3.8      | 100    |          |      | 55       |          |
| 617 |         |         | 9.6      | 421.25 |          | 480  | 200      | 110      |
| 618 | 149.98  |         |          | 168.5  |          | 160  | 87.5     | 70       |
| 619 |         |         | 10       |        | 25.87667 |      |          | 260      |
| 620 |         | 211.575 | 3        | 6.79   |          |      | 54       | 66.66666 |
| 621 | 364.53  |         | 12       | 101.97 |          |      | 30       | 120      |
| 622 |         |         | 8        | 95     |          |      | 122.5    | 40       |
| 623 |         |         |          | 47.5   |          |      |          |          |
| 624 |         |         | 6        |        | 30       |      | 95       |          |
| 625 |         |         | 7.2      |        | 2.96     |      |          |          |
| 626 | 149.49  |         | 9        | 120.37 |          |      | 50       |          |
| 627 |         |         | 12       |        |          |      |          |          |
| 628 |         |         | 12.5     | 102.23 |          |      |          |          |
| 629 | 249.15  |         | 3.583333 | 48     |          | 11.6 | 47.73333 |          |
| 630 | 769.02  |         | 8.4      | 43.5   |          | 20   | 50       |          |
| 631 | 249.96  |         | 2.25     |        | 15       | 140  |          | 91.5     |
| 632 |         |         | 3.68     |        |          | 105  | 21.66667 | 65       |
| 633 |         |         | 4.5      |        |          |      | 58.5     |          |
| 634 | 249.96  |         |          | 45     |          |      |          |          |
| 635 |         |         |          |        |          |      |          |          |
| 636 |         |         |          | 80     |          |      |          |          |
| 637 |         | 520     |          |        |          | 42   |          | 270      |
| 638 | 249.96  |         |          | 26     | 31       | 60   | 90       |          |
| 639 |         |         | 18       | 122    |          | 90   | 30       |          |
| 640 |         |         | 19.2     |        | 50       |      |          |          |
| 641 |         |         | 3        |        | 30       |      |          | 184.62   |
| 642 |         | 60.05   | 10       | 50     |          |      | 100      | 30       |
| 643 | 178.555 |         | 3        | 50     |          | 100  | 100      | 68.75    |
| 644 |         |         | 3.6      |        |          |      |          |          |
| 645 |         | 325     |          |        | 10       |      | 66.66666 | 40       |
| 646 | 311.44  |         | 13       | 80     | 40       |      | 277.5    | 110      |
| 647 | 312.45  |         | 19       | 91     | 30       |      | 78.75    |          |
| 648 | 622.87  |         | 5.174    | 14.5   | 49       |      |          |          |
| 649 |         |         | 15.3625  |        | 50       | 280  |          | 280      |
| 650 |         |         |          | 10     |          |      |          |          |
| 651 |         |         |          |        |          |      | 60       |          |
| 652 |         |         | 3.75     |        | 100      |      |          |          |
| 653 |         |         | 4        |        |          |      |          |          |
| 654 |         |         | 4        |        | 30       |      |          |          |
| 655 |         |         | 2.25     |        |          |      |          | 60       |

|     |         |         |          |        |          |        |          |          |
|-----|---------|---------|----------|--------|----------|--------|----------|----------|
| 656 |         | 520     | 10.8     | 17.36  | 40       |        | 30       |          |
| 657 |         | 520     | 24       | 113.61 | 32       |        | 108.5    |          |
| 658 |         |         | 4        | 80     |          |        |          | 30       |
| 659 | 78.11   |         |          | 50     |          |        | 49.16667 | 100      |
| 660 |         |         | 4.8      |        |          |        |          |          |
| 661 |         |         | 5        |        |          |        |          |          |
| 662 |         |         |          |        | 15       |        | 45       | 48.5     |
| 663 |         | 780.38  | 10.425   | 44     |          |        | 50       | 80       |
| 664 | 408.27  | 422.49  | 3.733333 | 21.5   |          | 55     |          | 55       |
| 665 |         |         |          |        |          | 70     |          | 40       |
| 666 |         |         |          |        |          | 52.5   |          | 40       |
| 667 | 207.62  |         |          |        | 35       |        | 255      |          |
| 668 | 386.425 |         | 7.733333 |        |          |        | 327      | 90.625   |
| 669 |         |         | 2.72     |        |          |        | 37.5     | 60       |
| 670 | 249.96  |         | 3        |        | 75       |        | 50       | 60       |
| 671 |         |         |          |        |          |        |          |          |
| 672 | 103.81  |         |          |        |          |        |          | 99       |
| 673 |         |         |          |        |          |        |          |          |
| 674 |         |         | 6        |        |          |        |          | 120      |
| 675 | 363.34  |         | 7.2      |        |          |        | 72       |          |
| 676 |         |         | 4        |        |          |        |          | 85       |
| 677 |         |         | 16.4     |        |          | 96     |          | 200      |
| 678 |         | 520     | 24       |        |          |        |          |          |
| 679 |         |         |          |        | 45       |        | 236.6667 | 32.5     |
| 680 | 520.75  |         |          |        |          |        | 69       | 155.6333 |
| 681 |         |         | 5        | 96.69  | 48       |        |          | 40       |
| 682 |         |         | 3.75     |        |          |        |          | 168.3333 |
| 683 |         |         | 15.9     |        |          |        | 16       | 70       |
| 684 |         |         | 6        |        |          | 20.625 | 17.185   | 120      |
| 685 |         |         | 9.2      |        |          | 22.5   | 18.75    | 120      |
| 686 |         |         | 5.2      |        |          | 11.25  | 24.375   | 240      |
| 687 | 211.08  | 1039.99 | 5        |        | 24       |        | 51       | 40       |
| 688 | 144.13  | 260.17  |          | 100    |          |        | 258.4    |          |
| 689 | 333.28  |         |          |        | 30       |        |          |          |
| 690 |         |         | 6.9      |        | 13.66667 |        | 117.3333 |          |
| 691 |         |         | 4.4      | 10     |          |        | 52.5     |          |
| 692 |         |         | 3.375    |        | 10       | 80     | 19       |          |
| 693 |         | 520     |          |        |          |        |          | 100      |
| 694 | 350.32  |         |          |        | 32       | 62.975 | 15       | 40       |
| 695 | 189.035 | 649.99  | 24.15    |        | 39       | 110.44 | 25       | 130      |
| 696 | 249.96  |         |          | 22     |          |        |          |          |

|     |        |         |          |          |      |          |         |
|-----|--------|---------|----------|----------|------|----------|---------|
| 697 | 78.11  |         | 9.6      |          |      | 26.66667 |         |
| 698 |        |         | 55.925   | 20.04    |      | 37.5     | 113.75  |
| 699 | 26.04  |         |          |          |      | 175      | 80      |
| 700 | 130.19 |         | 9.066667 | 50       | 39   | 71.04333 |         |
| 701 |        |         | 3.6      |          |      |          | 120     |
| 702 |        |         |          |          | 16   |          | 170     |
| 703 | 499.92 |         | 12       |          | 32   |          |         |
| 704 |        | 406.17  |          |          |      | 5.4      |         |
| 705 |        | 454.895 |          |          | 8    | 11.25    |         |
| 706 |        |         | 3        |          |      |          |         |
| 707 |        |         |          |          |      |          |         |
| 708 |        |         | 5.75     |          |      | 80       |         |
| 709 | 149.98 |         |          |          |      |          | 52.5    |
| 710 |        |         | 7.2      |          | 20   | 13.5     | 20      |
| 711 |        |         | 6.8      |          |      | 135      | 15      |
| 712 |        |         |          | 120      | 67.5 |          |         |
| 713 | 249.96 |         |          |          |      |          | 100     |
| 714 |        |         |          |          | 40   | 100      | 134.375 |
| 715 |        |         | 5.6      |          |      | 64       | 14      |
| 716 |        |         | 5.333333 |          |      | 50       |         |
| 717 | 74.99  |         | 6.6      |          |      |          |         |
| 718 |        |         | 39       |          |      | 62.5     | 58.42   |
| 719 |        |         | 9.125    |          |      |          | 36      |
| 720 |        |         |          |          |      |          | 35      |
| 721 |        |         | 4.8      |          |      | 140      |         |
| 722 |        | 376.28  | 6.15     |          |      | 30       |         |
| 723 |        | 643.17  | 25       |          |      |          | 500     |
| 724 |        |         | 8.55     | 20       |      | 90       | 50      |
| 725 | 149.49 |         | 16.5     | 57.06    | 48   |          | 100     |
| 726 |        |         |          |          | 26   |          | 30      |
| 727 |        |         |          |          |      |          |         |
| 728 |        |         | 4.466667 | 26.88333 |      | 100      | 36      |
| 729 |        |         | 4.8      |          |      |          | 195     |
| 730 |        |         | 4        |          |      |          | 81.25   |
| 731 | 280.29 |         | 2.25     |          |      | 50       | 110     |
| 732 |        |         | 13.08333 |          |      | 10       |         |
| 733 |        |         |          |          |      | 120      |         |
| 734 | 437.43 |         | 7.125    |          |      | 105      | 87.5    |
| 735 |        |         |          |          |      |          |         |
| 736 |        |         | 12       |          | 25   | 60       |         |
| 737 |        |         | 4        | 10       | 21   | 300      | 100     |

|     |         |        |          |         |          |     |       |          |
|-----|---------|--------|----------|---------|----------|-----|-------|----------|
| 738 |         |        |          | 20      |          | 200 | 52.5  | 60       |
| 739 |         |        | 4.8      |         |          |     |       | 83.83334 |
| 740 |         |        | 7.216667 |         |          |     | 57.5  |          |
| 741 | 249.96  | 519.99 |          |         |          | 35  | 30    |          |
| 742 | 124.57  | 325    | 10.8     |         |          | 60  | 30    |          |
| 743 | 278.31  |        |          | 22.5    | 22.66667 |     | 140   | 65       |
| 744 | 282.37  | 325    | 2.775    | 3.75    | 16       |     |       |          |
| 745 | 150.14  |        |          |         |          |     |       |          |
| 746 |         |        |          |         | 20       | 45  | 62.5  | 170      |
| 747 | 249.15  |        | 36       |         |          |     | 30    |          |
| 748 | 249.96  |        | 7.125    | 143.72  |          |     | 50    | 177      |
| 749 | 149.49  |        | 12.25    | 143.72  |          |     | 88.75 | 122.5    |
| 750 | 339.985 |        | 4.666667 | 120     | 68.14    |     |       |          |
| 751 | 2325.39 |        |          | 30      |          |     | 111   | 80       |
| 752 |         |        |          |         | 15       |     |       |          |
| 753 |         |        |          | 22      |          |     | 40    | 100      |
| 754 |         |        | 9        |         |          |     |       |          |
| 755 | 149.98  |        |          | 205.32  | 48       |     | 40    | 48.75    |
| 756 |         |        | 15.2     | 75      | 69       |     | 45    |          |
| 757 |         |        | 10.425   | 196.095 |          |     |       |          |
| 758 |         |        | 5        |         |          |     |       |          |
| 759 |         |        |          |         |          |     | 45    |          |
| 760 |         |        | 12.26667 |         |          | 70  |       |          |
| 761 | 249.96  |        |          |         |          | 30  |       |          |
| 762 |         |        | 14.4     |         | 48       |     |       | 65       |
| 763 |         |        | 14.55    | 16      | 20.6     | 170 | 88.25 |          |
| 764 |         |        | 2.815    |         |          |     | 75    |          |
| 765 |         |        | 12       |         |          |     |       |          |
| 766 |         |        | 12       |         |          |     |       |          |
| 767 | 307.245 |        | 2.25     |         | 30       |     | 40    | 130      |
| 768 |         |        | 10       |         |          |     |       | 81.25    |
| 769 | 249.96  |        |          |         |          |     |       | 55       |
| 770 |         |        | 12       |         |          |     |       |          |
| 771 |         |        |          |         |          |     | 115   | 165      |
| 772 | 129.76  |        |          |         | 16       |     | 115   | 140      |
| 773 |         | 519.99 |          |         |          |     |       |          |
| 774 |         |        |          |         |          |     | 45    |          |
| 775 |         |        |          | 44      |          |     | 60    | 148      |
| 776 |         |        | 3.75     |         |          |     |       | 100      |
| 777 |         | 649.99 | 8        | 62.5    |          | 140 |       |          |
| 778 |         |        | 17.33333 |         |          |     |       | 200      |

|     |          |        |          |        |          |       |          |          |
|-----|----------|--------|----------|--------|----------|-------|----------|----------|
| 779 |          |        | 14.4     |        |          |       |          | 80       |
| 780 | 374.94   |        |          |        | 49.38    | 21    | 16       |          |
| 781 | 249.96   |        | 6        |        |          | 60    |          |          |
| 782 | 249.96   |        |          |        |          |       | 50       |          |
| 783 | 199.32   |        | 7.5      | 24     |          |       | 90       |          |
| 784 | 125.12   |        |          |        |          |       |          |          |
| 785 |          | 520    |          |        |          |       |          |          |
| 786 |          | 519.99 |          |        |          |       |          |          |
| 787 | 249.15   |        | 12       | 26.88  |          |       |          |          |
| 788 | 149.49   |        | 8.2      | 57.06  |          |       | 31.91667 |          |
| 789 | 175.16   |        |          |        |          |       |          |          |
| 790 |          |        | 12       | 60     |          | 210   | 84       |          |
| 791 |          | 25     | 2        |        |          |       | 59       |          |
| 792 |          |        | 13       |        | 24       | 17.08 | 22.77333 | 100      |
| 793 | 209.3533 | 260    | 16       | 60     |          |       |          |          |
| 794 | 350.32   |        | 9.6      |        |          |       | 30       |          |
| 795 | 249.96   | 242.6  | 11.08    | 180    |          |       | 32.25    | 72.5     |
| 796 |          |        | 4        |        |          |       | 50       | 76.66666 |
| 797 |          |        | 9.333333 |        | 32       |       | 20       | 70       |
| 798 |          |        | 3        |        |          |       | 120      | 150      |
| 799 | 269.9133 |        | 14.54    | 66.875 |          |       |          |          |
| 800 |          |        | 7.2      |        |          |       | 132      | 40       |
| 801 |          | 234    | 8        |        |          |       | 300      |          |
| 802 | 149.98   |        | 2.4      |        |          | 150   |          | 56.66667 |
| 803 | 137.235  |        | 4.483334 | 152    | 14       |       | 50       | 40       |
| 804 | 74.99    |        |          | 76     |          |       | 5        | 40       |
| 805 | 280.8    |        | 3.933333 |        | 19.5     |       | 58.33333 | 65       |
| 806 |          |        | 7.2      |        |          |       |          |          |
| 807 |          |        | 2.25     |        |          |       |          |          |
| 808 |          |        | 12       | 70     |          |       |          | 230      |
| 809 |          |        | 11.21    |        | 24       |       |          | 92.31    |
| 810 |          | 460.28 |          | 120.14 | 15       | 60    | 80       | 40       |
| 811 |          |        | 15       |        |          |       | 15       |          |
| 812 |          |        |          |        |          |       | 100      | 24       |
| 813 |          |        |          |        |          |       | 150      | 35       |
| 814 | 149.98   |        | 24.3     |        |          | 420   | 60       |          |
| 815 | 247.075  |        | 20       |        | 30       |       | 25       | 95       |
| 816 |          |        | 3        |        | 26.66667 |       | 40       | 97.5     |
| 817 |          | 779.98 | 12       | 120    |          |       |          | 40       |
| 818 |          |        |          | 50     |          |       |          | 26.4     |
| 819 | 394.7567 |        | 14       |        | 5        |       | 27.46667 |          |

|     |         |          |       |        |          |       |          |          |
|-----|---------|----------|-------|--------|----------|-------|----------|----------|
| 820 |         |          | 5     |        |          | 15    | 24.75    | 102      |
| 821 | 216.76  |          |       | 15     |          |       | 30       |          |
| 822 | 368.53  |          | 4     | 50.26  |          |       |          |          |
| 823 | 253.735 |          |       | 30     | 15.66667 | 39.75 | 37.5     | 55       |
| 824 |         |          | 4.8   |        | 20       |       | 36.15    | 100      |
| 825 |         | 520.58   | 12.4  | 280    |          |       | 360      | 41.66667 |
| 826 |         |          | 5.25  | 219.12 | 16       |       | 19.66667 | 70       |
| 827 |         |          | 18    |        |          |       |          |          |
| 828 | 364.53  | 226.085  |       | 201.17 |          |       | 100      |          |
| 829 | 155.72  |          |       | 33.125 |          |       |          |          |
| 830 |         |          | 19    |        | 15       | 355   | 150      | 80       |
| 831 |         |          |       | 110    |          |       | 175      | 100      |
| 832 |         |          |       |        |          |       |          |          |
| 833 |         |          |       | 16     |          | 140   |          | 95       |
| 834 |         |          | 8     | 22.5   | 8        |       | 13.32    | 50       |
| 835 |         |          | 6.8   |        | 12       |       | 48.66333 |          |
| 836 |         |          |       |        |          |       | 39.84    | 240      |
| 837 |         |          | 8     |        |          |       | 125      | 16       |
| 838 |         |          |       | 45.07  | 20       |       | 50       |          |
| 839 | 190.075 |          | 10    |        | 23       | 117.5 |          |          |
| 840 | 499.92  |          | 10    |        | 400      | 94    | 51.6     |          |
| 841 | 86.76   |          | 13.6  | 63     | 30       | 35    |          | 65       |
| 842 |         |          |       |        | 22       |       | 46.66667 | 80       |
| 843 |         |          | 9     |        | 5        |       |          |          |
| 844 |         |          | 17.5  | 30     |          |       | 250      | 230      |
| 845 |         |          | 24    |        |          |       | 30       | 200      |
| 846 | 288.26  |          |       |        |          |       | 75       | 200      |
| 847 |         | 259.81   | 8.875 | 7.5    | 16       |       |          |          |
| 848 |         | 227.5    | 4.2   | 30     | 30       |       | 171.26   |          |
| 849 |         |          | 7.85  | 10     | 30       | 85    | 60       |          |
| 850 | 199.32  |          | 16.8  | 157.44 | 59.25    |       |          | 130.6    |
| 851 | 298.98  |          | 6.9   |        | 50       |       |          |          |
| 852 |         |          |       |        |          |       |          |          |
| 853 |         |          |       |        |          |       |          |          |
| 854 |         | 77.5     |       |        | 17.5     |       |          |          |
| 855 | 125     |          | 10.75 |        |          | 56.25 |          |          |
| 856 |         |          | 4.5   |        | 39       | 175   |          | 40       |
| 857 |         |          | 5.7   |        |          |       |          | 50       |
| 858 | 498.3   |          |       | 10     | 20       |       |          | 35       |
| 859 |         |          |       |        |          |       | 36       |          |
| 860 |         | 151.6667 |       |        |          |       | 40       |          |



|     |         |          |       |        |     |       |          |       |
|-----|---------|----------|-------|--------|-----|-------|----------|-------|
| 861 | 249.96  | 390.09   | 10.75 | 69.98  |     |       | 34       |       |
| 862 |         | 325.09   | 8.6   | 38.115 |     |       | 31       |       |
| 863 | 240.22  |          | 9.6   | 20     |     | 80    |          | 95    |
| 864 |         |          | 12    |        |     |       | 16       |       |
| 865 | 311.435 |          | 7.8   |        |     |       | 45       | 150   |
| 866 |         |          | 15    | 260    | 100 | 140   | 100      | 80    |
| 867 |         |          |       | 100    | 100 |       |          |       |
| 868 |         |          | 2.25  |        |     |       |          |       |
| 869 | 520.75  |          | 5     |        |     |       |          |       |
| 870 | 612.49  |          |       | 37.5   |     |       |          |       |
| 871 |         |          |       |        |     | 290   |          |       |
| 872 |         |          |       | 60     |     |       | 100      |       |
| 873 |         |          |       |        |     | 106.5 |          |       |
| 874 | 498.3   |          | 24.5  |        |     |       | 60       | 37.5  |
| 875 |         | 350      |       |        |     |       | 80       |       |
| 876 | 499.92  |          | 9.6   |        |     |       |          |       |
| 877 |         |          | 12    | 150    |     |       |          | 60    |
| 878 |         |          |       |        |     |       | 45       |       |
| 879 | 298.98  |          | 3.6   |        |     |       |          |       |
| 880 | 218.005 |          | 8.8   |        |     |       |          |       |
| 881 | 249.96  |          | 12.4  | 30     | 20  |       | 78       |       |
| 882 | 299.225 |          | 7.2   | 66.2   | 30  |       | 100      |       |
| 883 |         | 256.8667 | 29    | 105    |     |       |          | 40    |
| 884 |         | 324.3175 | 5.425 | 32.7   |     | 140   |          | 40    |
| 885 |         |          | 21.6  |        |     |       | 46.57333 |       |
| 886 |         |          | 6     |        |     | 140   | 112.5    |       |
| 887 |         |          | 12.53 |        |     |       | 120      |       |
| 888 |         |          | 7.5   |        |     |       |          |       |
| 889 |         |          | 9     | 80     |     |       | 36       |       |
| 890 | 624.9   |          |       |        |     |       | 58.6     |       |
| 891 | 171.85  |          | 12    |        |     |       | 43.78    |       |
| 892 |         |          | 11.7  |        |     |       |          | 100   |
| 893 |         |          | 10.8  |        |     |       |          | 100   |
| 894 |         |          |       | 10     |     | 160   | 130.66   |       |
| 895 | 199.565 |          | 8     | 38     |     | 120   | 44       | 79.22 |
| 896 |         |          | 6     |        |     |       |          |       |
| 897 | 249.96  |          | 12    |        |     |       |          |       |
| 898 |         |          | 6     |        |     |       | 60       | 57.5  |
| 899 | 249.555 | 260      | 2.725 | 110    | 23  | 30    | 106      | 93    |
| 900 | 149.98  |          | 18    |        |     |       | 150      |       |
| 901 |         |          | 4.565 |        |     |       |          | 100   |

|     |        |        |          |       |          |          |          |        |
|-----|--------|--------|----------|-------|----------|----------|----------|--------|
| 902 |        |        | 4        |       |          |          |          | 150    |
| 903 |        |        | 12.33333 |       |          |          | 27       |        |
| 904 | 200.18 |        | 4        |       |          |          |          |        |
| 905 |        |        | 4        |       |          |          |          |        |
| 906 |        |        | 4.333333 |       | 50       |          |          | 40     |
| 907 |        |        | 3.883333 |       | 20       | 18       | 34       |        |
| 908 | 244.98 |        | 21.33333 | 85    | 15       | 140      | 30       | 475.63 |
| 909 |        |        |          |       | 30       |          | 26.66667 |        |
| 910 |        | 395.46 | 9.6      |       |          |          | 30       | 40     |
| 911 |        | 395.46 | 12       |       |          |          | 30       | 40     |
| 912 |        |        | 4        |       | 15       |          | 122.5    |        |
| 913 | 299.95 |        |          |       |          | 100      | 45       | 40     |
| 914 |        |        | 18       |       | 30       |          | 82.5     |        |
| 915 | 302.04 |        |          |       | 98.5     |          | 35       | 210    |
| 916 |        |        |          |       |          |          | 163.3333 | 120    |
| 917 | 364.53 |        |          |       |          |          |          | 75     |
| 918 | 249.96 |        |          |       |          |          |          |        |
| 919 |        |        |          |       |          |          | 240      |        |
| 920 | 363.34 |        | 12       |       | 30       |          |          |        |
| 921 | 298.98 |        |          | 40    |          |          | 100      |        |
| 922 |        |        | 14.4     |       |          |          | 48       |        |
| 923 |        |        | 10.66667 | 83    | 15       | 21       | 21       |        |
| 924 |        |        |          |       | 29.66667 |          |          |        |
| 925 |        |        | 12       | 90.18 | 24       | 45       | 39.18833 | 16.25  |
| 926 |        |        |          |       |          | 145      | 18       | 60     |
| 927 |        |        | 10.5     | 62    | 40       | 53.33333 | 96       | 40     |
| 928 |        | 520.35 |          |       |          |          |          | 65     |
| 929 |        |        | 2        |       |          |          | 102.5    |        |
| 930 | 255.17 |        | 6.5      | 68.75 |          | 140      |          | 80     |
| 931 | 416.6  |        |          |       | 30       |          | 10       | 180    |
| 932 |        |        |          |       | 20       |          |          | 100    |
| 933 |        |        | 10.4     |       | 20       | 50       |          |        |
| 934 | 249.96 | 650    | 5.425    |       |          |          | 18       |        |
| 935 |        |        | 6.625    |       |          |          | 120.4    | 100    |
| 936 |        |        | 12.5     |       | 16       |          | 90       | 300    |
| 937 | 249.96 |        | 21       |       | 40       |          | 95       | 180    |
| 938 |        |        | 19.2     |       | 10       |          | 175      | 185    |
| 939 | 149.49 |        | 5.083333 |       |          |          |          | 160    |
| 940 |        |        | 12       | 50    |          | 70       |          | 30     |
| 941 |        |        | 12       | 54    |          | 157.5    |          |        |
| 942 |        |        | 9        | 65    |          |          | 30       | 142.5  |

|     |        |        |          |          |      |          |          |        |
|-----|--------|--------|----------|----------|------|----------|----------|--------|
| 943 |        |        |          | 80       | 30   |          |          |        |
| 944 | 149.98 |        | 3.75     | 18       |      |          |          |        |
| 945 |        |        | 18       |          | 100  |          |          |        |
| 946 |        | 519.99 | 10.55    |          |      |          | 111.8333 | 50     |
| 947 | 240.22 |        |          | 11       | 25   | 13.5     | 98.5     | 90     |
| 948 | 208.3  |        |          | 42.255   |      |          |          |        |
| 949 |        |        | 5.733333 |          |      | 45       |          |        |
| 950 |        |        | 12       |          |      |          |          |        |
| 951 |        |        | 24       |          | 30   |          |          |        |
| 952 |        |        | 50       |          | 20   |          | 100      |        |
| 953 | 249.15 | 390    |          |          |      |          |          |        |
| 954 |        | 390    |          |          |      |          | 45       |        |
| 955 |        |        |          |          | 24   |          | 87.5     | 280    |
| 956 |        |        |          |          |      | 40       | 48       | 100    |
| 957 |        | 200    | 5.76     |          | 18   |          | 18.33    | 60     |
| 958 |        |        | 2.375    |          |      |          | 32       | 100    |
| 959 | 363.34 |        | 8        |          | 100  | 433.3333 | 50       | 110    |
| 960 |        |        | 6.375    |          |      | 26.25    | 25       |        |
| 961 |        |        | 108      |          |      |          | 360      |        |
| 962 |        |        |          |          |      |          |          |        |
| 963 |        |        | 27       |          | 65   |          |          |        |
| 964 |        |        | 9.3125   | 67.5     |      | 107.5    | 49.125   | 65     |
| 965 | 249.15 |        | 23.48    | 200      |      | 105.25   | 28.5     | 80     |
| 966 |        | 160.41 | 13.2     | 24.14    |      |          | 69       | 40     |
| 967 | 249.96 |        | 5.56     | 18.33333 |      |          | 15       |        |
| 968 | 208.3  |        | 10.41667 | 47.5     | 26   |          |          |        |
| 969 | 124.57 | 312    | 5.625    |          |      |          | 45       |        |
| 970 | 104.15 | 325    | 5.75     | 65       |      |          | 23.75    |        |
| 971 |        |        | 7.25     |          |      |          |          |        |
| 972 |        |        |          |          |      |          |          |        |
| 973 |        |        | 18       |          |      |          |          |        |
| 974 | 380.15 |        | 5.15     |          |      |          | 33.75    | 187.55 |
| 975 |        |        | 12.5125  | 90       | 31.2 | 188      |          | 110    |
| 976 |        |        | 4        |          | 39   |          | 166.6667 | 100    |
| 977 |        |        | 7.466667 |          | 16   |          | 80       | 100    |
| 978 | 374.94 |        | 9.75     |          |      | 42.6     | 45       | 65     |
| 979 | 165.8  |        | 14.4     |          | 25   | 70       | 60       | 65     |
| 980 |        | 260    | 4.8      |          | 25   |          |          | 40     |
| 981 | 498.3  |        | 24       | 213.03   |      |          |          |        |
| 982 |        |        | 3.6      |          |      | 175      |          |        |
| 983 |        | 278.25 | 12.525   |          |      |          | 25       |        |

|      |          |        |          |     |      |       |        |      |
|------|----------|--------|----------|-----|------|-------|--------|------|
| 984  | 104.15   | 321.59 | 10.8     | 190 |      |       |        |      |
| 985  |          |        |          |     |      |       | 45     |      |
| 986  |          |        | 9.6      |     |      |       | 60     |      |
| 987  |          |        | 2.25     |     |      |       | 60     |      |
| 988  |          |        | 9        | 50  |      |       |        |      |
| 989  |          |        | 8.35     |     |      |       |        |      |
| 990  |          |        | 9.6      |     |      |       |        |      |
| 991  |          |        |          |     |      |       | 60     | 45   |
| 992  |          |        |          |     |      |       | 75     | 100  |
| 993  |          |        | 15       |     | 24.5 |       |        | 45   |
| 994  |          |        | 6.05     |     | 80   |       |        | 65   |
| 995  |          |        | 16       |     |      |       |        |      |
| 996  | 143.0567 |        | 3.7      |     | 37.5 |       |        | 57.6 |
| 997  | 249.96   |        | 10.75    | 90  |      |       | 48     |      |
| 998  |          |        | 33.6     | 150 |      | 60    | 145.75 | 10   |
| 999  |          |        | 5.55     |     | 48   |       |        | 65   |
| 1000 |          |        | 9.6      |     | 24   |       | 100    |      |
| 1001 |          |        |          |     |      |       |        | 180  |
| 1002 |          |        |          |     |      |       |        | 80   |
| 1003 |          |        | 19.8     |     | 55   | 138.6 | 310    |      |
| 1004 |          |        | 9.416667 |     | 115  |       |        | 120  |
| 1005 |          |        | 4.5      |     |      |       |        |      |
